# Supplementary material for: RECAST: Study protocol for an observational study for the understanding of the increased REsilience of Children compared to Adults in SARS-CoV-2 infecTion
Source: PubMed Central journal article supplement — BMJ Open. 2023 Apr 17;13(4):e065221. doi: 10.1136/bmjopen-2022-065221 (PMC10111194; doi:10.1136/bmjopen-2022-065221), 2023-04-17
Supplement: bmjopen-2022-065221.draft_revisions.pdf [file bmjopen-2022-065221.draft_revisions.pdf]

# BMJ Open

BMJ Open is committed to open peer review. As part of this commitment we make the peer review history of every article we publish publicly available.

When an article is published we post the peer reviewers' comments and the authors' responses online. We also post the versions of the paper that were used during peer review. These are the versions that the peer review comments apply to.

The versions of the paper that follow are the versions that were submitted during the peer review process. They are not the versions of record or the final published versions. They should not be cited or distributed as the published version of this manuscript.

BMJ Open is an open access journal and the full, final, typeset and author-corrected version of record of the manuscript is available on our site with no access controls, subscription charges or pay-per-view fees (<http://bmjopen.bmj.com>).

If you have any questions on BMJ Open's open peer review process please email [info.bmjopen@bmj.com](mailto:info.bmjopen@bmj.com)

# BMJ Open

## RECAST: An observational study for the understanding of the increased REsilience of Children compared to Adults in SARS-CoV-2 infection

|                               |                                                                                                                                                                                                                                                                                                                                                                                                                                                                                                                                                                                                                                                                                                                                                                                                                                                                                                                                                                                                                                                                                                                                                                                                                                                                                                                                                                                                                                                                                                                                                                                                                                                                                                                                                                                                                                                                                                                                                                                                                                                                                                                                                                                 |
|-------------------------------|---------------------------------------------------------------------------------------------------------------------------------------------------------------------------------------------------------------------------------------------------------------------------------------------------------------------------------------------------------------------------------------------------------------------------------------------------------------------------------------------------------------------------------------------------------------------------------------------------------------------------------------------------------------------------------------------------------------------------------------------------------------------------------------------------------------------------------------------------------------------------------------------------------------------------------------------------------------------------------------------------------------------------------------------------------------------------------------------------------------------------------------------------------------------------------------------------------------------------------------------------------------------------------------------------------------------------------------------------------------------------------------------------------------------------------------------------------------------------------------------------------------------------------------------------------------------------------------------------------------------------------------------------------------------------------------------------------------------------------------------------------------------------------------------------------------------------------------------------------------------------------------------------------------------------------------------------------------------------------------------------------------------------------------------------------------------------------------------------------------------------------------------------------------------------------|
| Journal:                      | <i>BMJ Open</i>                                                                                                                                                                                                                                                                                                                                                                                                                                                                                                                                                                                                                                                                                                                                                                                                                                                                                                                                                                                                                                                                                                                                                                                                                                                                                                                                                                                                                                                                                                                                                                                                                                                                                                                                                                                                                                                                                                                                                                                                                                                                                                                                                                 |
| Manuscript ID                 | bmjopen-2022-065221                                                                                                                                                                                                                                                                                                                                                                                                                                                                                                                                                                                                                                                                                                                                                                                                                                                                                                                                                                                                                                                                                                                                                                                                                                                                                                                                                                                                                                                                                                                                                                                                                                                                                                                                                                                                                                                                                                                                                                                                                                                                                                                                                             |
| Article Type:                 | Protocol                                                                                                                                                                                                                                                                                                                                                                                                                                                                                                                                                                                                                                                                                                                                                                                                                                                                                                                                                                                                                                                                                                                                                                                                                                                                                                                                                                                                                                                                                                                                                                                                                                                                                                                                                                                                                                                                                                                                                                                                                                                                                                                                                                        |
| Date Submitted by the Author: | 31-May-2022                                                                                                                                                                                                                                                                                                                                                                                                                                                                                                                                                                                                                                                                                                                                                                                                                                                                                                                                                                                                                                                                                                                                                                                                                                                                                                                                                                                                                                                                                                                                                                                                                                                                                                                                                                                                                                                                                                                                                                                                                                                                                                                                                                     |
| Complete List of Authors:     | <p>Stricker, Sebastian; Charité Universitätsmedizin Berlin, Department of Pediatric Respiratory Medicine, Immunology and Critical Care Medicine<br/> Ziegahn, Niklas; Charité Universitätsmedizin Berlin<br/> Karsten, Martin; Karsten, Rugo, Wagner, paediatric practice<br/> Boeckel, Thomas; Boeckel, Haverkaemper, paediatric practice and practice for paediatric cardiology<br/> Stich-Boeckel, Heike; Stich-Boeckel, paediatric practice<br/> Maske, Jakob; Maske, Pankok, paediatric practice<br/> Rugo, Evelyn; Karsten, Rugo, Wagner, paediatric practice<br/> Balazs, Anita; Charité Universitätsmedizin Berlin, Department of Paediatric Respiratory Medicine, Immunology and Critical Care Medicine<br/> Millar Büchner, Pamela ; Charité Universitätsmedizin Berlin, Department of Paediatric Respiratory Medicine, Immunology and Critical Care Medicine<br/> Dang-Heine, Chantip; Berlin Institute of Health at Charité, Clinical Study Center (CSC)<br/> Schriever, Valentin; Charité Universitätsmedizin Berlin, Department of Paediatric Neurology; Charité Universitätsmedizin Berlin, Center for Chronically Sick Children (Sozialpädiatrisches Zentrum, SPZ)<br/> Eils, Roland; Berlin Institute of Health at Charité, Center for Digital Health; Berlin Institute of Health at Charité, Molecular Epidemiology Unit<br/> Lehmann, Irina; Berlin Institute of Health at Charité, Center for Digital Health; German Center for Lung Research<br/> Sander, Leif Erik; Charité Universitätsmedizin Berlin, Department of Infectious Diseases and Respiratory Medicine<br/> Ralsler, Markus; Charité Universitätsmedizin Berlin, Department of Biochemistry; The Francis Crick Institute, Molecular Biology of Metabolism Laboratory<br/> Corman, Victor; Charité Universitätsmedizin Berlin, Institute of Virology<br/> Mall, Marcus; Charité Universitätsmedizin Berlin; German Center for Lung Research<br/> Sawitzki, Birgit; Charité Universitätsmedizin Berlin; Berlin Institute of Health at Charité<br/> Roehmel, Jobst; Charité Universitätsmedizin Berlin, Department of Paediatric Respiratory Medicine, Immunology and Critical Care Medicine</p> |
| Keywords:                     | IMMUNOLOGY, PAEDIATRICS, VIROLOGY                                                                                                                                                                                                                                                                                                                                                                                                                                                                                                                                                                                                                                                                                                                                                                                                                                                                                                                                                                                                                                                                                                                                                                                                                                                                                                                                                                                                                                                                                                                                                                                                                                                                                                                                                                                                                                                                                                                                                                                                                                                                                                                                               |
|                               |                                                                                                                                                                                                                                                                                                                                                                                                                                                                                                                                                                                                                                                                                                                                                                                                                                                                                                                                                                                                                                                                                                                                                                                                                                                                                                                                                                                                                                                                                                                                                                                                                                                                                                                                                                                                                                                                                                                                                                                                                                                                                                                                                                                 |

1  
2  
3  
4  
5  
6  
7  
8  
9  
10  
11  
12  
13  
14  
15  
16  
17  
18  
19  
20  
21  
22  
23  
24  
25  
26  
27  
28  
29  
30  
31  
32  
33  
34  
35  
36  
37  
38  
39  
40  
41  
42  
43  
44  
45  
46  
47  
48  
49  
50  
51  
52  
53  
54  
55  
56  
57  
58  
59  
60

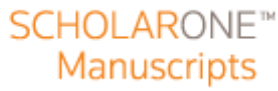

1  
2  
3 **RECAST: An observational study for the understanding of the increased**  
4  
5 **REsilience of Children compared to Adults in SARS-CoV-2 infection**  
6

7 Sebastian Stricker<sup>1</sup>, Niklas Ziegahn<sup>1</sup>, Martin Karsten<sup>2</sup>, Thomas Boeckel<sup>3</sup>, Heike Stich-  
8 Boeckel<sup>4</sup>, Jakob Maske<sup>5</sup>, Evelyn Rugo<sup>2</sup>, Anita Balázs<sup>1</sup>, Pamela Millar Büchner<sup>1</sup>,  
9  
10 Chantip Dang-Heine<sup>6</sup>, Valentin Alexander Schriever<sup>7,8</sup>, Roland Eils<sup>9, 10</sup>, Irina  
11  
12 Lehmann<sup>11, 12</sup>, Leif Erik Sander<sup>13</sup>, Markus Ralser<sup>14,15</sup>, Victor Max Corman<sup>16</sup>, Marcus A.  
13  
14 Mall<sup>1,12</sup>, Birgit Sawitzki<sup>17,18</sup>, Jobst Röhmel<sup>1</sup>  
15  
16  
17  
18  
19  
20  
21

22 **Affiliations:**  
23

- 24  
25 1. Charité – Universitätsmedizin Berlin, Department of Paediatric Respiratory  
26 Medicine, Immunology and Critical Care Medicine, Augustenburger Platz 1,  
27 13353 Berlin, Germany.  
28  
29 2. Karsten, Rugo, Wagner, paediatric practice, Aßmannshauer Str. 11a, 14197  
30 Berlin, Germany.  
31  
32 3. Boeckel, Haverkaemper, paediatric practice and practice for paediatric cardiology,  
33 Prager Straße 10, 10779 Berlin, Germany.  
34  
35 4. Stich-Boeckel, paediatric practice, Hauptstr. 132, 10827 Berlin, Germany.  
36  
37 5. Maske, Pankok, paediatric practice, Goebenstraße 24, 10783, Berlin, Germany.  
38  
39 6. Clinical Study Center (CSC), Berlin Institute of Health at the Charité -  
40 Universitätsmedizin Berlin, Augustenburger Platz 1, 13353 Berlin, Germany.  
41  
42 7. Charité – Universitätsmedizin Berlin, Department of Paediatric Neurology,  
43 Augustenburger Platz 1, 13353 Berlin, Germany.  
44  
45 8. Charité – Universitätsmedizin Berlin, Center for Chronically Sick Children  
46 (Sozialpädiatrisches Zentrum, SPZ), Augustenburger Platz 1, 13353 Berlin,  
47 Germany  
48  
49 9. Center for Digital Health, Berlin Institute of Health at the Charité –  
50 Universitätsmedizin Berlin, Augustenburger Platz 1, 13353 Berlin, Germany.  
51  
52  
53  
54  
55  
56  
57  
58  
59  
60

- 1  
2  
3 10. Molecular Epidemiology Unit, Berlin Institute of Health at the Charité –  
4  
5       Universitätsmedizin Berlin, Augustenburger Platz 1, 13353 Berlin, Germany.  
6  
7 11. Center for Digital Health, Berlin Institute of Health (BIH) at the Charité –  
8  
9       Universitätsmedizin Berlin.  
10  
11 12. German Center for Lung Research (DZL), associated partner site, Berlin, Germany  
12  
13 13. Department of Infectious Diseases and Respiratory Medicine, Charité –  
14  
15       Universitätsmedizin Berlin, Augustenburger Platz 1, 13353 Berlin, Germany.  
16  
17 14. Molecular Biology of Metabolism Laboratory, The Francis Crick Institute, London,  
18  
19       UK.  
20  
21 15. Charité – Universitätsmedizin Berlin, Department of Biochemistry, corporate  
22  
23       member of Freie Universität Berlin and Humboldt-Universität zu Berlin, 10117  
24  
25       Berlin, Germany.  
26  
27 16. Charité – Universitätsmedizin Berlin, Institute of Virology, Rahel-Hirsch-Weg 3,  
28  
29       10117 Berlin, Germany.  
30  
31 17. Charité – Universitätsmedizin Berlin, Institute of Medical Immunology,  
32  
33       Augustenburger Platz 1, 13353 Berlin, Germany.  
34  
35 18. Berlin Institute of Health at the Charité - Universitätsmedizin Berlin, Anna-Louisa-  
36  
37       Karsch-Str. 2, 10178 Berlin, Germany.  
38  
39  
40  
41  
42

43 **Correspondence:** Dr. Jobst Röhmel, Charité – Universitätsmedizin Berlin,  
44  
45 Department of Paediatric Respiratory Medicine, Immunology and Critical Care  
46  
47 Medicine, Augustenburger Platz 1, 13353 Berlin, Germany.  
48  
49 jobst.roehmel@charite.de ; Tel.: +49 450 616446.  
50  
51

52  
53 **Word count:** 3734  
54  
55  
56  
57  
58  
59  
60

## ABSTRACT

**Introduction:** The SARS-CoV-2 pandemic remains a threat to public health. Soon after its outbreak, it became apparent that children are less severely affected. Indeed, opposing clinical manifestations between children and adults are observed for other infections. The SARS-CoV-2 outbreak provides the unique opportunity to study the underlying mechanisms. This protocol describes the methods of an observational study that aims to describe age dependent differences in immune responses to primary respiratory infections using SARS-CoV-2 as a model virus and to assess age differences in clinical outcomes including lung function.

**Methods and Analysis:** The study aims to recruit at least 120 children and 60 adults that are infected with SARS-CoV-2 and collect specimen for a multi-omics analysis, including single cell RNA sequencing of nasal epithelial cells and peripheral blood mononuclear cells, mass cytometry of whole blood samples and nasal cells, mass spectrometry-based serum and plasma proteomics, nasal epithelial cultures with functional *in vitro* analyses, SARS-CoV-2 antibody testing, sequencing of the viral genome and lung function testing. Data obtained from this multi-omics approach is correlated with medical history and clinical data. Recruitment started in October 2020 and is ongoing.

**Ethics and dissemination:** The study was reviewed and approved by the Ethics Committee of Charité – Universitätsmedizin Berlin (EA2/066/20). All collected specimens are stored in the central biobank of Charité – Universitätsmedizin Berlin and are made available to all participating researchers and on request.

The study is registered at the German Clinical Trials Register with number DRKS00025715.

1  
2  
3 **Key Words:** SARS-CoV-2, children, multiple breath washout, immune response,  
4  
5  
6 resilience, multi-omics  
7  
8  
9

### 10 11 **Strengths and limitations of this study**

- 12 • Initial sampling in the early phase of SARS-CoV-2 infection enables insights in  
13 the primary immune response of children compared to adults. Longitudinal  
14 sampling allows to detect long term effects.
- 15 • A multi-omics approach with state-of-the-art techniques permits a high  
16 resolution immune mapping of SARS-CoV-2 infections
- 17 • Data is completed with clinical information and lung function testing
- 18 • Since the recruitment period extends over more than 18 month there will be a  
19 chance to study the immune response against different variants of the SARS-  
20 CoV-2 virus  
21  
22  
23  
24  
25  
26  
27  
28  
29  
30  
31  
32  
33  
34  
35  
36  
37  
38  
39  
40  
41  
42  
43  
44  
45  
46  
47  
48  
49  
50  
51  
52  
53  
54  
55  
56  
57  
58  
59  
60

## INTRODUCTION

In December 2019, the novel coronavirus SARS-CoV-2 emerged as cause of acute pneumonia <sup>1 2</sup>. By August 2021, more than 200 million people were infected with SARS-CoV-2 <sup>3</sup>. Soon after the beginning of the pandemic, it became obvious that children have an increased resilience against the primary infection. The course of disease in children is more likely to be milder and severe or even fatal courses remain extremely rare <sup>4-8</sup>. Various hypotheses to explain the reduced susceptibility and mortality of children are currently discussed, including reduced virus entry via ACE-2 in children <sup>9</sup>, pre-activated components of the immune system, such as cross-reactive T cells <sup>10-13</sup> and antibodies <sup>14</sup>, or a more accentuated innate immunity in children <sup>15 16</sup> (table 1). Most of these findings are complementary in the explanation of the observed phenomenon, however some findings are in part contradictory and require further investigation. Opposing clinical manifestations between children and adults are also observed for other viral respiratory infections <sup>17 18 19</sup>. This points to major changes in the general immune response pattern during aging. In the past comparative immune response analyses to primary infections in various age groups were difficult to perform, as many adults had been already exposed to the pathogens. The SARS-CoV-2 outbreak provides the unique opportunity to study the age-dependent changes in immune responses in a controlled manner.

To understand the mechanisms behind the lower susceptibility of children compared to adults to develop severe COVID-19 disease, we have established the observational study RECAST (increased **RE**silience of **C**hildren compared to **A**dults in **SARS-CoV-2** infection) focusing on the differences in the clinical presentation, lung function and the immune response to SARS-CoV-2 in children compared to adults.



**Table 1.** Hypotheses to explain the resilience of children in SARS-CoV-2 infections

| Hypothesis                                                                                                                | Proposed explanation                                                                                | Scientific findings                                                                                                                                                                                                                                                                                                 |
|---------------------------------------------------------------------------------------------------------------------------|-----------------------------------------------------------------------------------------------------|---------------------------------------------------------------------------------------------------------------------------------------------------------------------------------------------------------------------------------------------------------------------------------------------------------------------|
| <b>Reduced susceptibility for SARS-CoV-2 in children</b> <sup>20</sup>                                                    | Reduced virus entry via ACE-2 in children                                                           | SARS-Cov-2 uses ACE-2 in the upper and lower airways for host cell entry <sup>21</sup>                                                                                                                                                                                                                              |
|                                                                                                                           |                                                                                                     | The age-dependency of ACE-2 expression is controversially discussed <sup>22 23 24</sup><br>Even though an increased expression of ACE-2 renders the individual more susceptible to viral infection, ACE-2 also initiates anti-inflammatory signaling and might contribute to a milder immune response <sup>25</sup> |
| <b>Age-dependent differential immune activation pattern</b>                                                               | Pre-activated immune components in children entail a milder immune response                         | In early childhood, infections of the upper respiratory tract are frequent. It has been proposed that previous infections with coronaviridae might contribute to a cross-reactive immunity <sup>26</sup>                                                                                                            |
|                                                                                                                           |                                                                                                     | Pre-existing T cell reactivity to SARS-CoV-2 could affect the severity of COVID-19 <sup>10-13 27</sup>                                                                                                                                                                                                              |
|                                                                                                                           |                                                                                                     | Cross-reactive antibodies entail a milder immune response to SARS-CoV-2 <sup>14</sup> . Of note, uninfected infants do not express cross-reactive antibodies <sup>28</sup>                                                                                                                                          |
|                                                                                                                           |                                                                                                     | The polyclonality and polyreactivity of IgM naturally present in children recognizes SARS-CoV-2 particles <sup>29</sup>                                                                                                                                                                                             |
|                                                                                                                           | Children possess a stronger innate immunity than adults                                             | Children display a higher basal expression of pattern recognition receptors than adults and a stronger innate antiviral response <sup>15 30</sup>                                                                                                                                                                   |
|                                                                                                                           |                                                                                                     | The nasopharyngeal mucosa of children exhibits a stronger innate immunity and expresses more anti-viral cytokines than adults <sup>16</sup>                                                                                                                                                                         |
|                                                                                                                           | Children expose a different cytokine response upon SARS-CoV-2 infection than adults                 | In COVID-19, a cytokine storm leads to acute respiratory distress syndrome <sup>31 32</sup>                                                                                                                                                                                                                         |
|                                                                                                                           |                                                                                                     | Certain cytokine patterns correlate with COVID-19 severity <sup>33</sup>                                                                                                                                                                                                                                            |
| Pro-inflammatory cytokine concentrations might be lower in children infected with SARS-CoV-2 than in adults <sup>34</sup> |                                                                                                     |                                                                                                                                                                                                                                                                                                                     |
| Co-infections lead to a milder immune reaction, e.g. because of virus competition or primed immune components             | In COVID-19, Co-infection with other pathogens is not rare, especially in children <sup>35-37</sup> |                                                                                                                                                                                                                                                                                                                     |

1  
2  
3 The complexity of immune responses requires a multi-level approach to display  
4 changes on various layers, including local immune cell composition, cytokine signaling  
5 and systemic response. It can be assumed that the combination of several  
6 mechanisms leads to the largely different phenotypes. At the same time, modern  
7 techniques allow to engage on an exploratory approach analyzing simultaneously the  
8 involvement of canonical and non-canonical immune response patterns. The multi-  
9 omics approach presented here allows deeply detailed characterization of the various  
10 layers of age dependent specific immune responses. Therefore, we believe that the  
11 presented study design will contribute to a further understanding even beyond COVID-  
12 19.

13  
14 To meet these requirements adequately, we chose a multi-omics approach, including:  
15 i) single cell RNA sequencing of peripheral blood mononuclear cells (PBMC) and nasal  
16 epithelial cells, ii) mass spectrometry-based serum and plasma proteomics, which has  
17 been used to identify prognostic marker signatures for SARS-CoV-2 disease severity  
18 and devise risk-adapted treatment strategies <sup>38</sup>, iii) mass cytometry (cytometry by time-  
19 of-flight, CyTOF) of whole blood samples and nasal cells, that has been used to  
20 elucidate the role of T cell cytotoxicity in COVID <sup>27</sup> and to identify a dysregulation of  
21 the myeloid cell compartment as hallmark of severe COVID <sup>39</sup>, iv) highly differentiated  
22 nasal epithelial cultures and functional *in vitro* analyses, that have been used to display  
23 age-related differences in the nasal epithelium <sup>40</sup>, v) antibody testing and vi)  
24 sequencing of the viral genome. Obtained data are complemented with anamnestic  
25 and clinical information, lung function testing, including spirometry and multiple breath  
26 washout, which is a standardized method that allows to assess the ventilation  
27 homogeneity of the lungs already in preschool children, as well as testing of smell and  
28 taste. Longitudinal sampling allows monitoring of the immune response over the  
29  
30  
31  
32  
33  
34  
35  
36  
37  
38  
39  
40  
41  
42  
43  
44  
45  
46  
47  
48  
49  
50  
51  
52  
53  
54  
55  
56  
57  
58  
59  
60

1  
2  
3 course of disease and beyond. Due to the maturation of the immune system during  
4  
5 childhood, age-specific immune response pattern against SARS-CoV-2 can be  
6  
7 expected <sup>41 42</sup>. Thus participants of all age groups are enrolled.  
8  
9

10 Participant recruitment began in October 2020 and is ongoing. Of particular interest is  
11  
12 the recruitment of children infected with various SARS-CoV-2 virus variants of concern.  
13  
14  
15

### 16 **Study objectives**

17  
18  
19 This study aims to characterize and compare primary infections with SARS-CoV-2 in  
20  
21 children and adults, and to identify age-related determinants of disease course and  
22  
23 prognosis. The immune system is not only highly complex, but immune response  
24  
25 patterns also vary depending on individual predisposition; moreover, it also matures  
26  
27 throughout the ageing of an individual. Furthermore, of pivotal interest for the  
28  
29 interpretation of these data is the correlation between immune response pattern and  
30  
31 clinical outcome.  
32  
33  
34  
35  
36

## 37 **METHODS AND ANALYSIS**

### 38 **Study design**

39  
40  
41 RECAST is a prospective observational cohort study at Charité – Universitätsmedizin  
42  
43 Berlin in Berlin, Germany. It is a sub-study of the Pa-COVID study of the Charité <sup>43</sup>,  
44  
45 aiming to characterize the disease course of patients suffering from COVID-19.  
46  
47  
48

49  
50 Data is collected longitudinally from patients with confirmed COVID-19 at three time  
51  
52 points, directly after the diagnosis and at follow-up visits after two weeks and four to  
53  
54 six months, and from healthy age-matched controls.  
55  
56  
57  
58  
59  
60

## Study population

### Inclusion criteria

Main inclusion criteria for the index person is a primary acute SARS-CoV-2 infection in a minor (< 18 years of age) with positive PCR or antigen testing (both will be confirmed by PCR testing).

### Exclusion criteria

Subjects with preexisting conditions affecting the immune response, such as diseases requiring chemotherapy or syndromes with immunodeficiency and subjects with concomitant medication that affects the immune response, such as systemic steroids, biologicals or investigational therapeutics targeting SARS-CoV-2, are excluded.

## Study procedures

### Patient identification and recruitment

A network of participating pediatric outpatient practices (n=20) has been established as sentinels to provide access to a pool of >25.000 pediatric patients. All children who tested positive for SARS-CoV-2 by PCR or antigen testing as well as their household members are eligible for inclusion.

Healthy controls are recruited from clinical routine diagnostic settings if the diagnostic screening for SARS-CoV-2 was negative.

### Medical history and clinical assessment

Assessed data include epidemiological and demographic parameters, medical history and potential risk factors, clinical course – including all diagnostic results of the present medical attendance – and household and family constellation. A complete list of all items is attached in the appendix (table E1).

1  
2  
3 Data are collected at first contact and during the follow-up visits. Symptoms of post- /  
4 long-COVID <sup>44</sup> are documented and symptoms of myalgic encephalomyelitis / chronic  
5 fatigue syndrome are assessed with the Canadian consensus criteria <sup>45 46</sup>, Chalder  
6 Fatigue Scale <sup>47</sup> and PedsQL Multidimensional Fatigue Scale <sup>48-56</sup>. Loss of smell and  
7 taste are assessed with the “U-Sniff” test, a 12-item odor identification, the “Sniffin’  
8 Sticks” olfactory threshold test and taste samples for sweet, sour, salty, and bitter  
9 tastes <sup>57 58</sup>. For adults, health status and quality of life are assessed with the St  
10 George's Respiratory Questionnaire <sup>59</sup> and health status and mental health are  
11 evaluated with PHQ-9 <sup>60</sup> and PCL-5 <sup>61</sup> questionnaires. For children, quality of life is  
12 assessed using the KINDL questionnaire <sup>62</sup>.

13  
14  
15  
16  
17  
18  
19  
20  
21  
22  
23  
24  
25  
26  
27 Disease severity is classified according to clinical features using the criteria outlined in  
28 the WHO COVID-19 clinical management guideline <sup>63</sup> as asymptomatic, mild,  
29 moderate, severe or critical disease. Also, clinical progression is classified according  
30 to the WHO clinical progression scale <sup>64</sup>. Applied classification scales are shown in  
31 tables 2 and 3.

**Table 2. COVID disease severity.**

Abbreviated criteria for COVID-19 disease severity according to WHO COVID-19 Clinical management guideline<sup>63</sup>.

| Disease severity        | Definition                                                                | Criteria                                                                                                                                                                                                                                                                                                                                                                                                                                     |
|-------------------------|---------------------------------------------------------------------------|----------------------------------------------------------------------------------------------------------------------------------------------------------------------------------------------------------------------------------------------------------------------------------------------------------------------------------------------------------------------------------------------------------------------------------------------|
| <b>Asymptomatic</b>     |                                                                           |                                                                                                                                                                                                                                                                                                                                                                                                                                              |
| <b>Mild</b>             |                                                                           | Symptomatic patients meeting the case definition for COVID-19 without evidence of viral pneumonia or hypoxia                                                                                                                                                                                                                                                                                                                                 |
| <b>Moderate</b>         | Pneumonia                                                                 | Clinical signs of (non-severe) pneumonia<br>Adolescent or adult: Fever, cough, dyspnoea, fast breathing<br>Child: Cough or difficulty breathing + fast breathing and/or chest indrawing<br>Diagnosis can be made on clinical grounds; chest imaging (radiograph, CT scan, ultrasound) may assist in diagnosis and identify or exclude pulmonary complications.                                                                               |
| <b>Severe</b>           | Severe pneumonia                                                          | Adolescent or adult: Plus one of the following: respiratory rate > 30 breaths/min; severe respiratory distress; or SpO <sub>2</sub> < 90% on room air<br>Child: Plus at least one of the following: Central cyanosis or SpO <sub>2</sub> < 90%; severe respiratory distress (e.g. fast breathing, grunting, very severe chest indrawing); general danger sign: inability to breastfeed or drink, lethargy or unconsciousness, or convulsions |
| <b>Critical disease</b> | Acute respiratory distress syndrome (ARDS)<br>OR<br>sepsis / septic shock | Oxygenation impairment, invasive ventilation or bilevel NIV / CPAP (≥ 5 cmH <sub>2</sub> O) required<br>OR<br>Infection and ≥ 2 Systemic Inflammatory Response Syndrome (SIRS) criteria                                                                                                                                                                                                                                                      |

**Table 3.** WHO clinical progression scale.Modified from WHO working group <sup>64</sup>.

| Patient State                         | Descriptor                                                                                                                   | Score |
|---------------------------------------|------------------------------------------------------------------------------------------------------------------------------|-------|
| <b>Uninfected</b>                     | Uninfected; no viral RNA detected                                                                                            | 0     |
| <b>Ambulatory: mild disease</b>       | Asymptomatic; viral RNA detected                                                                                             | 1     |
|                                       | Symptomatic; independent                                                                                                     | 2     |
|                                       | Symptomatic; assistance needed                                                                                               | 3     |
| <b>Hospitalized: moderate disease</b> | Hospitalized; no oxygen therapy                                                                                              | 4     |
|                                       | Hospitalized; oxygen by mask or nasal prongs                                                                                 | 5     |
| <b>Hospitalized: severe disease</b>   | Hospitalized; oxygen by NIV or high flow                                                                                     | 6     |
|                                       | Intubation and mechanical ventilation, pO <sub>2</sub> /pFiO <sub>2</sub> ≥ 150 or SpO <sub>2</sub> /FiO <sub>2</sub> ≥ 200  | 7     |
|                                       | Mechanical ventilation, pO <sub>2</sub> /pFiO <sub>2</sub> < 150 ( SpO <sub>2</sub> /FiO <sub>2</sub> < 200) or vasopressors | 8     |
|                                       | Mechanical ventilation, pO <sub>2</sub> /pFiO <sub>2</sub> < 150 and vasopressors, dialysis or ECMO                          | 9     |
| <b>Dead</b>                           | Dead                                                                                                                         | 10    |

### Sample collection

Nasal and pharyngeal swab samples are collected for a SARS-CoV-2-PCR, single-cell RNA sequencing and establishment of air-liquid cell cultures. In addition, peripheral blood mononuclear cells (PBMCs) are collected for single-cell sequencing, whole blood for mass cytometry and plasma and serum for mass-spectrometry based proteomics, and SARS-CoV-2-specific antibody testing.

### Study database

For Pa-COVID-19 a study protocol was established that harmonizes clinical, molecular, and immunological phenotyping assessment in COVID-19 patients<sup>43</sup>. All data are added to an electronic case report form (eCRF; SecuTrial). Participants included in RECAST are part of Pa-COVID-19. All participants are assigned a pseudonym consisting of a six- or seven-digit alphanumeric participant code. A separate log allows to match each participant and their code. Access to SecuTrial requires username and password. All local data are secured by password.

### Sample description

Patients recruited in RECAST are grouped into six age categories (table 4). Due to the nature of observatory studies and the lack of pre-existing data, it is not possible to predict the extent of assumptive differences. Preliminary findings suggest that for most planned analyses a sample size of 15 is sufficient. The outlined sample sizes should suffice even for comparisons between children of different age groups.



**Table 4.** Age categories of the RECAST participants.

Participants in the RECAST study are grouped according to their age and their disease state. The projected minimum number of participants for each group as well as the timepoints for samplings are stated.

| Age group       |                                | Disease state | Number      | Timepoints         |                    |
|-----------------|--------------------------------|---------------|-------------|--------------------|--------------------|
| <b>Children</b> | Nursery (0-3 years)            | SARS-CoV2 -   | ≥ 30        | 1                  |                    |
|                 |                                | SARS-CoV2 +   | ≥ 30        | 3 (day 0, 14, 180) |                    |
|                 | Kindergarten (3-6 years)       | SARS-CoV2 -   | ≥ 30        | 1                  |                    |
|                 |                                | SARS-CoV2 +   | ≥ 30        | 3 (day 0, 14, 180) |                    |
|                 | Primary school (6-12 years)    | SARS-CoV2 -   | ≥ 30        | 1                  |                    |
|                 |                                | SARS-CoV2 +   | ≥ 30        | 3 (day 0, 14, 180) |                    |
|                 | Secondary school (13-18 years) | SARS-CoV2 -   | ≥ 30        | 1                  |                    |
|                 |                                | SARS-CoV2 +   | ≥ 30        | 3 (day 0, 14, 180) |                    |
|                 | <b>Adults</b>                  | <60 years     | SARS-CoV2 - | ≥ 30               | 1                  |
|                 |                                |               | SARS-CoV2 + | ≥ 30               | 3 (day 0, 14, 180) |
| >60 years       |                                | SARS-CoV2 -   | ≥ 30        | 1                  |                    |
|                 |                                | SARS-CoV2 +   | ≥ 30        | 3 (day 0, 14, 180) |                    |
| <b>TOTAL</b>    |                                |               | ≥ 360       | ≥ 720              |                    |

## PLANNED ANALYSES AND OUTCOMES OF INTEREST

We propose a multi-omics workup for all patients. A synopsis of the planned analyses is depicted in figure 1.

### **SARS-CoV-2-specific PCR and antibody testing**

All participants are screened for an active SARS-CoV-2 infection with RT-qPCRs targeting E and N genes <sup>65</sup>. Antibody testing is conducted for all serum and saliva samples with SARS-CoV-2-specific IgG- and IgA-ELISAs. In case of a reactive screening result, confirmatory testing with a recombinant Immunofluorescence assay (IFA) and a plaque reduction neutralization test <sup>66</sup> are conducted.

### **Nasal epithelial culture and functional *in-vitro* analyses**

Conditional reprogramming allows for the generation of long-term cultures of primary airway epithelial cells <sup>67-71</sup>. Without the need of genetic modification or clone selection, conditional reprogramming enables cell expansion, while re-differentiated cultures retain their organ-specific phenotype <sup>72</sup>. We establish highly differentiated polarized *in-vitro* air-liquid interface cultures that reproduce and allow for the analysis of physiological *in-vivo* conditions, such as heterogeneous cell composition with preserved lineage <sup>73</sup> as well as functional characteristics, including production of airway surface liquid <sup>74 75</sup> and mucociliary clearance <sup>76 77</sup>. For material collection, FLOQswabs (Copan, Italy) are used. Swabs are transferred into DMEM/F12 medium (Gibco, USA) and transported to our laboratory within two hours.

### **Mass cytometry of whole blood samples**

Whole blood is fixed with a proteomic stabilizer for preservation of surface and intracellular markers. Blood samples are stored at -80 °C until batch-based analysis. Thawed samples are stained in batches of nine patient and one anchor reference

1  
2  
3 sample. Upon barcoding of individual samples, they are pooled and stained with metal  
4  
5 isotype conjugated anti-human antibodies as described previously <sup>27 39</sup>. CyTOF  
6  
7 technology allows for the detection of more than 40 different barcodes simultaneously  
8  
9 to identify cell populations in a high-throughput setting <sup>78 39</sup>.

### 13 **Mass spectrometry-based serum and plasma proteomics**

14  
15 A platform technology with semi-automated sample preparation to allow for ultra-high-  
16  
17 throughput liquid chromatography and mass-spectrometry based analyses of the  
18  
19 proteome has recently been established by members of our group <sup>79</sup>. In a directed  
20  
21 approach, we characterize the immune response-related serum and plasma proteome,  
22  
23 with focus on the acute phase response and the complement system. However, the  
24  
25 plethora of proteome signals that are generated per sample also allows for an  
26  
27 undirected approach, delivering predictive proteome signatures. To facilitate the  
28  
29 computation of such extensive bulk data, a deep neural network is employed <sup>80</sup>.

### 34 **Single-cell sequencing of nasal epithelial cell samples and PBMCs**

35  
36 The nasopharynx is the entry point for an infection with SARS-CoV-2 <sup>81</sup> and as such  
37  
38 of distinguished concern in the exploration of the individual immune response pattern.  
39  
40 Using single-cell RNA sequencing (scRNAseq) of nasal and bronchial samples, we  
41  
42 were previously able to identify cell types and states that correlate with a severe  
43  
44 disease course of COVID-19 <sup>82</sup>. Here, scRNAseq will be applied to define the  
45  
46 composition and transcriptional activity of immune and epithelial cells in the nasal  
47  
48 environment of children and adults throughout the various states of SARS-CoV-2  
49  
50 infection. Nasal swabs (FLOQswabs, Copan, Italy) are used for sample collection.  
51  
52 Following sample collection, swabs are directly transferred into cold DMEM/F12  
53  
54 medium (Gibco, USA) and transported to our biosafety laboratory within one hour for  
55  
56  
57  
58  
59  
60

1  
2  
3 further processing. Library preparation is performed according to manufacturer's  
4 protocol (10x) and sequencing is performed using the Illumina NextSeq 6000 platform.  
5  
6  
7

8 In addition to the analysis of cells in the respiratory environment, PBMCs are isolated  
9 to study the transcriptional activity of blood cell populations. Cell separation, library  
10 preparation and comparative single cell transcriptome analyses are conducted  
11 according to the manufacturer's protocol. Differential transcriptome profiles of immune  
12 cells of the blood will help us to characterize the distinctive features of the systemic  
13 and localized immune response to SARS-CoV-2 infections in children and adults.  
14  
15  
16  
17  
18  
19  
20  
21  
22

### 23 **Lung function testing and multiple breath washout**

24  
25 SARS-CoV-2 infections cause severe lung damage in adults <sup>31 32</sup>. In a large review  
26 with 2135 children, 45% (951 children) were classified with a severity of moderate,  
27 severe or critical, all with lung involvement per definition <sup>7</sup>. There is evidence that  
28 children with acute lung injury experience the same lung pathologies as adults <sup>83</sup>. To  
29 assess the extent of transient and permanent functional lung impairment, we  
30 investigate the lung function with spirometry and multiple breath washout (MBW).  
31 MBW measures the lung ventilation homogeneity <sup>84 85</sup>. This technique is already  
32 feasible without sedation in children from 2 years of age <sup>85</sup>. The technical MBW  
33 procedures are in accordance with the American Thoracic Society Technical  
34 Statement <sup>86</sup>. Measurements are conducted by certified personnel (ECFS-CTN  
35 certified) and for study measurements Exhalyzer D (Ecomedics, Dürnden, Switzerland)  
36 will be used <sup>87</sup>. N<sub>2</sub> washout is used as tracer gas to determine the lung clearance index  
37 as outcome measure. The lung clearance index (LCI) increases with lung ventilation  
38 inhomogeneity.  
39  
40  
41  
42  
43  
44  
45  
46  
47  
48  
49  
50  
51  
52  
53  
54  
55  
56  
57  
58  
59  
60

## Biobanking

Collected material is processed and stored at the central biobank of Charité (ZeBanC, <https://biobank.charite.de>). Material that is not immediately used is subjected to cryopreservation.

## ETHICS AND DISSEMINATION

All procedures in this study are in compliance with the principles of the 1964 Declaration of Helsinki and its amendments. We act in adherence to the principles of Good Clinical Practice (International Council for Harmonization, ICH 1996). The study was reviewed and approved by the Charité Ethics Committee (EA2/066/20). All participants enrolled give written informed consent in person, for participants minor of age the written informed consent of the legal guardian is also required.

Study procedures never interfere with the medical management of participants. Samples required for medical management always have priority. There is no direct benefit for patients participating in the study. Results from the study might improve our understanding of the disease and benefit the public health.

Data is monitored regularly. Informed consent forms are audited by a monitor appointed by the Charité Clinical Trial Management Unit. Data monitoring of collected data is performed in the course of the study.

As established for Pa-COVID <sup>43</sup>, we reiterate the fundamental principle in this study that all contributors and researchers who have access to samples commit to unrestricted data sharing. In accordance with FAIR data principles, all data collected shall be findable, accessible, interoperable, and re-usable <sup>88</sup>. Each participating research group will publish their findings individually and in correlation with each other.

## Patient and public involvement

We will disseminate all findings in an appropriate and understandable manner to all participants, including children. We welcome the collaboration of participants and public in the interpretation and dissemination of all findings.

## DISCUSSION

The SARS-CoV-2 pandemic has accelerated scientific research in the field of virology and related immunobiology for nearly two years, yet many crucial questions remain unanswered. Soon after the emergence of the virus it became apparent that, while children are just as likely to be infected with SARS-CoV-2 as adults, they are less severely affected<sup>4-8 89</sup>. RECAST is an observational study that aims to elucidate the differences between children and adults in primary SARS-CoV-2 infections using a multi-omics approach. Revealing age-dependent differences will help to develop better suited therapeutics and vaccination strategies beyond SARS-CoV-2 infections.

Previous multi-omics approaches conducted with specimen from adult donors served to elucidate the immune response in COVID<sup>82 90</sup>, to identify predictors of severe disease courses<sup>91 92</sup> and to isolate possible targets for therapy<sup>82 92 93</sup>. Multi-omics-based studies focusing on SARS-CoV-2 infections in children remain rare and are limited to small participant numbers and only analyze a limited number of -omics dimensions: A study including 24 infected children analyzed the single-cell transcriptional landscape in the upper airways<sup>15</sup>; with single-cell multi-omic profiling of matched nasal, tracheal, bronchial and blood samples of 19 infected children, a study characterized the immune landscape with focus on the upper airways<sup>30</sup>; the plasma proteomic and metabolomic data of 18 infected children was analyzed in another study<sup>94</sup>; clinical characteristics and serum markers were analyzed in a larger group that

1  
2  
3 summarized children and young adults and T cell response in a pediatric subgroup of  
4  
5 11 participants was examined <sup>95</sup>; and a study with 24 infected children analyzed the T  
6  
7 cell response and specific antibody response <sup>96</sup>. Even though these studies contributed  
8  
9 greatly to a better understanding of age-related immune response patterns in COVID-  
10  
11 19, there is still a substantial demand for research. Especially studies analyzing the  
12  
13 immune response over the whole age and severity spectrum applying a multi-omics  
14  
15 approach are needed. In addition, mechanistic investigations, revealing the causal  
16  
17 relationship between the different immune defense layers, are missing. In RECAST,  
18  
19 we will conduct a full multi-omics workup with at least 120 infected children, a larger  
20  
21 number of participants than in previously published multi-omics studies. Moreover, we  
22  
23 will conduct follow-up visits for 6 months to profile the development of age-specific  
24  
25 immune response patterns over the course of time. Biobanking and long-term storage  
26  
27 of samples will be used to perform subsequent mechanistic studies upon first data  
28  
29 collection and hypotheses formulation. The recruitment of family members, both  
30  
31 infected and non-infected, allows to assess the effect of genetic relationships. The  
32  
33 combination of high resolution multi-dimensional immunologic methods with clinical  
34  
35 endpoints in the RECAST study will enable us to contribute to the understanding of the  
36  
37 increased resilience of children to SARS-CoV-2 infections.  
38  
39  
40  
41  
42  
43  
44

45 **Author Contributions:** BS, JR, MAM, VC, MR, LS, RE, IL, MK, JM, HS, TB and ER  
46  
47 designed the study. SS and JR drafted the protocol. All authors critically revised and  
48  
49 approved the manuscript.  
50

51  
52 **Funding statement:** This work was supported by the German Federal Ministry of  
53  
54 Education and Research (grant number 01KI20337).  
55

56  
57 **Competing interests statement:** SS, NZ, MK, HSB, JM, ER, AB, PMB, CDH, VAS,  
58  
59 RE, IL, MR, MM, BS and JR have no conflict of interest related to this study. TB  
60

1  
2  
3 received payments for his participation in an advisory board for vaccination against  
4 SARS-CoV-2. VC has a patent pending in the diagnosis of SARS-CoV-2 infections. LS  
5  
6 was involved in further studies relating to SARS-CoV-2 that were funded by national  
7  
8 grants.  
9  
10

11  
12  
13 **Acknowledgements:** We thank participating children and their families for their close  
14 collaboration. We also thank all outpatient pediatricians who are involved in the  
15 recruitment.  
16  
17  
18  
19  
20  
21  
22  
23  
24  
25  
26  
27  
28  
29  
30  
31  
32  
33  
34  
35  
36  
37  
38  
39  
40  
41  
42  
43  
44  
45  
46  
47  
48  
49  
50  
51  
52  
53  
54  
55  
56  
57  
58  
59  
60

For peer review only



## REFERENCES

1. Zhou P, Yang XL, Wang XG, et al. A pneumonia outbreak associated with a new coronavirus of probable bat origin. *Nature* 2020;579(7798):270-73. doi: 10.1038/s41586-020-2012-7 [published Online First: 2020/02/06]
2. Zhu N, Zhang D, Wang W, et al. A Novel Coronavirus from Patients with Pneumonia in China, 2019. *N Engl J Med* 2020;382(8):727-33. doi: 10.1056/NEJMoa2001017 [published Online First: 2020/01/25]
3. Organization WH. WHO COVID-19 Dashboard. 2020
4. Liguoro I, Pilotto C, Bonanni M, et al. SARS-COV-2 infection in children and newborns: a systematic review. *Eur J Pediatr* 2020;179(7):1029-46. doi: 10.1007/s00431-020-03684-7 [published Online First: 2020/05/20]
5. Castagnoli R, Votto M, Licari A, et al. Severe Acute Respiratory Syndrome Coronavirus 2 (SARS-CoV-2) Infection in Children and Adolescents: A Systematic Review. *JAMA Pediatr* 2020;174(9):882-89. doi: 10.1001/jamapediatrics.2020.1467 [published Online First: 2020/04/23]
6. Zhou F, Yu T, Du R, et al. Clinical course and risk factors for mortality of adult inpatients with COVID-19 in Wuhan, China: a retrospective cohort study. *Lancet* 2020;395(10229):1054-62. doi: 10.1016/S0140-6736(20)30566-3 [published Online First: 2020/03/15]
7. Dong Y, Mo X, Hu Y, et al. Epidemiology of COVID-19 Among Children in China. *Pediatrics* 2020;145(6):e20200702. doi: 10.1542/peds.2020-0702
8. Bhopal SS, Bagaria J, Olabi B, et al. Children and young people remain at low risk of COVID-19 mortality. *Lancet Child Adolesc Health* 2021;5(5):e12-e13. doi: 10.1016/S2352-4642(21)00066-3 [published Online First: 2021/03/14]
9. Dioguardi M, Cazzolla AP, Arena C, et al. Innate Immunity in Children and the Role of ACE2 Expression in SARS-CoV-2 Infection. *Pediatr Rep* 2021;13(3):363-82. doi: 10.3390/pediatric13030045 [published Online First: 2021/07/22]
10. Mateus J, Grifoni A, Tarke A, et al. Selective and cross-reactive SARS-CoV-2 T cell epitopes in unexposed humans. *Science* 2020;370(6512):89-94. doi: 10.1126/science.abd3871 [published Online First: 2020/08/06]
11. Shrock E, Fujimura E, Kula T, et al. Viral epitope profiling of COVID-19 patients reveals cross-reactivity and correlates of severity. *Science* 2020;370(6520) doi: 10.1126/science.abd4250 [published Online First: 2020/10/01]
12. Loyal L, Braun J, Henze L, et al. Cross-reactive CD4(+) T cells enhance SARS-CoV-2 immune responses upon infection and vaccination. *Science* 2021;374(6564):eabh1823. doi: 10.1126/science.abh1823 [published Online First: 2021/09/02]
13. Braun J, Loyal L, Frentsch M, et al. SARS-CoV-2-reactive T cells in healthy donors and patients with COVID-19. *Nature* 2020;587(7833):270-74. doi: 10.1038/s41586-020-2598-9 [published Online First: 2020/07/30]
14. Guo L, Wang Y, Kang L, et al. Cross-reactive antibody against human coronavirus OC43 spike protein correlates with disease severity in COVID-19 patients: a retrospective study. *Emerg Microbes Infect* 2021;10(1):664-76. doi: 10.1080/22221751.2021.1905488 [published Online First: 2021/03/19]
15. Loske J, Rohmel J, Lukassen S, et al. Pre-activated antiviral innate immunity in the upper airways controls early SARS-CoV-2 infection in children. *Nat Biotechnol* 2021 doi: 10.1038/s41587-021-01037-9 [published Online First: 2021/08/20]
16. Pierce CA, Sy S, Galen B, et al. Natural mucosal barriers and COVID-19 in children. *JCI Insight* 2021;6(9) doi: 10.1172/jci.insight.148694 [published Online First: 2021/04/07]
17. Coates BM, Staricha KL, Wiese KM, et al. Influenza A Virus Infection, Innate Immunity, and Childhood. *JAMA Pediatr* 2015;169(10):956-63. doi: 10.1001/jamapediatrics.2015.1387 [published Online First: 2015/08/04]
18. Prendergast AJ, Klenerman P, Goulder PJ. The impact of differential antiviral immunity in children and adults. *Nat Rev Immunol* 2012;12(9):636-48. doi: 10.1038/nri3277

19. Nam HH, Ison MG. Respiratory syncytial virus infection in adults. *BMJ* 2019;366:l5021. doi: 10.1136/bmj.l5021 [published Online First: 20190910]
20. Viner RM, Mytton OT, Bonell C, et al. Susceptibility to SARS-CoV-2 Infection Among Children and Adolescents Compared With Adults: A Systematic Review and Meta-analysis. *JAMA Pediatr* 2021;175(2):143-56. doi: 10.1001/jamapediatrics.2020.4573 [published Online First: 2020/09/26]
21. Hoffmann M, Kleine-Weber H, Schroeder S, et al. SARS-CoV-2 Cell Entry Depends on ACE2 and TMPRSS2 and Is Blocked by a Clinically Proven Protease Inhibitor. *Cell* 2020;181(2):271-80.e8. doi: 10.1016/j.cell.2020.02.052
22. Zhang Z, Guo L, Huang L, et al. Distinct disease severity between children and older adults with COVID-19: Impacts of ACE2 expression, distribution, and lung progenitor cells. *Clin Infect Dis* 2021 doi: 10.1093/cid/ciaa1911 [published Online First: 2021/01/04]
23. Yonker LM, Neilan AM, Bartsch Y, et al. Pediatric Severe Acute Respiratory Syndrome Coronavirus 2 (SARS-CoV-2): Clinical Presentation, Infectivity, and Immune Responses. *J Pediatr* 2020;227:45-52 e5. doi: 10.1016/j.jpeds.2020.08.037 [published Online First: 2020/08/23]
24. Koch CM, Prigge AD, Anekalla KR, et al. Immune response to SARS-CoV-2 in the nasal mucosa in children and adults. *medRxiv* 2021 doi: 10.1101/2021.01.26.21250269 [published Online First: 2021/02/04]
25. Felsenstein S, Hedrich CM. SARS-CoV-2 infections in children and young people. *Clin Immunol* 2020;220:108588. doi: 10.1016/j.clim.2020.108588 [published Online First: 2020/09/10]
26. Lee CH, Pinho MP, Buckley PR, et al. Potential CD8+ T Cell Cross-Reactivity Against SARS-CoV-2 Conferred by Other Coronavirus Strains. *Front Immunol* 2020;11:579480. doi: 10.3389/fimmu.2020.579480 [published Online First: 2020/12/01]
27. Georg P, Astaburuaga-García R, Bonaguro L, et al. Complement activation induces excessive T cell cytotoxicity in severe COVID-19. *Cell* 2021 doi: <https://doi.org/10.1016/j.cell.2021.12.040>
28. Fraley E, LeMaster C, Banerjee D, et al. Cross-reactive antibody immunity against SARS-CoV-2 in children and adults. *Cell Mol Immunol* 2021;18(7):1826-28. doi: 10.1038/s41423-021-00700-0 [published Online First: 2021/06/02]
29. Massalska MA, Gober HJ. How Children Are Protected From COVID-19? A Historical, Clinical, and Pathophysiological Approach to Address COVID-19 Susceptibility. *Front Immunol* 2021;12:646894. doi: 10.3389/fimmu.2021.646894 [published Online First: 2021/06/29]
30. Yoshida M, Worlock KB, Huang N, et al. Local and systemic responses to SARS-CoV-2 infection in children and adults. *Nature* 2022;602(7896):321-27. doi: 10.1038/s41586-021-04345-x [published Online First: 2021/12/23]
31. Fajgenbaum DC, June CH. Cytokine Storm. *New England Journal of Medicine* 2020;383(23):2255-73. doi: 10.1056/NEJMra2026131
32. Kommos FKF, Schwab C, Tavernar L, et al. The Pathology of Severe COVID-19-Related Lung Damage. *Dtsch Arztebl Int* 2020;117(29-30):500-06. doi: 10.3238/arztebl.2020.0500 [published Online First: 2020/09/01]
33. Ozsurekci Y, Aykac K, Er AG, et al. Predictive value of cytokine/chemokine responses for the disease severity and management in children and adult cases with COVID-19. *J Med Virol* 2021;93(5):2828-37. doi: 10.1002/jmv.26683 [published Online First: 2020/11/24]
34. Jia R, Wang X, Liu P, et al. Mild Cytokine Elevation, Moderate CD4(+) T Cell Response and Abundant Antibody Production in Children with COVID-19. *Virol Sin* 2020;35(6):734-43. doi: 10.1007/s12250-020-00265-8 [published Online First: 2020/07/24]
35. Schneider JG, Relich RF, Datta D, et al. Identifying Risk Factors That Distinguish Symptomatic Severe Acute Respiratory Syndrome Coronavirus 2 Infection From

- 1  
2  
3 Common Upper Respiratory Infections in Children. *Cureus* 2021;13(2):e13266. doi:  
4 10.7759/cureus.13266 [published Online First: 2021/03/18]  
5 36. Wu Q, Xing Y, Shi L, et al. Coinfection and Other Clinical Characteristics of COVID-19 in  
6 Children. *Pediatrics* 2020;146(1) doi: 10.1542/peds.2020-0961 [published Online  
7 First: 2020/05/08]  
8 37. Li Y, Wang H, Wang F, et al. Co-infections of SARS-CoV-2 with multiple common  
9 respiratory pathogens in infected children: A retrospective study. *Medicine (Baltimore)*  
10 2021;100(11):e24315. doi: 10.1097/MD.00000000000024315 [published Online First:  
11 2021/03/18]  
12 38. Demichev V, Tober-Lau P, Lemke O, et al. A time-resolved proteomic and prognostic  
13 map of COVID-19. *Cell Syst* 2021 doi: 10.1016/j.cels.2021.05.005 [published Online  
14 First: 2021/06/18]  
15 39. Schulte-Schrepping J, Reusch N, Paclik D, et al. Severe COVID-19 Is Marked by a  
16 Dysregulated Myeloid Cell Compartment. *Cell* 2020;182(6):1419-40 e23. doi:  
17 10.1016/j.cell.2020.08.001 [published Online First: 2020/08/19]  
18 40. Anita Balázs PM-B, Michael Mülleler, Vadim Farztdinov, Lukasz Szyrwiell, Annalisa  
19 Addante, Aditi Kuppe, Tihomir Rubil, Marika Drescher, Kathrin Seidel, Sebastian  
20 Stricker, Roland Eils, Irina Lehmann, Birgit Sawitzki, Jobst Röhmel, Markus Ralser  
21 and Marcus Mall. Age-related differences in structure and function of nasal epithelial  
22 cultures from healthy children and elderly people. *Frontiers in Immunology* 2022  
23 41. Shaw AC, Goldstein DR, Montgomery RR. Age-dependent dysregulation of innate  
24 immunity. *Nat Rev Immunol* 2013;13(12):875-87. doi: 10.1038/nri3547 [published  
25 Online First: 2013/10/26]  
26 42. Simon AK, Hollander GA, McMichael A. Evolution of the immune system in humans from  
27 infancy to old age. *Proc Biol Sci* 2015;282(1821):20143085. doi:  
28 10.1098/rspb.2014.3085 [published Online First: 2015/12/25]  
29 43. Kurth F, Roennefarth M, Thibeault C, et al. Studying the pathophysiology of coronavirus  
30 disease 2019: a protocol for the Berlin prospective COVID-19 patient cohort (Pa-  
31 COVID-19). *Infection* 2020;48(4):619-26. doi: 10.1007/s15010-020-01464-x  
32 44. Koczulla AR, Ankermann T, Behrends U, et al. [S1 Guideline Post-COVID/Long-COVID].  
33 *Pneumologie* 2021 doi: 10.1055/a-1551-9734 [published Online First: 2021/09/03]  
34 45. Carruthers BM, Jain AK, De Meirleir KL, et al. Myalgic Encephalomyelitis/Chronic Fatigue  
35 Syndrome. *Journal of Chronic Fatigue Syndrome* 2003;11(1):7-115. doi:  
36 10.1300/j092v11n01\_02  
37 46. Kedor C, Freitag H, Meyer-Arndt L, et al. Chronic COVID-19 Syndrome and Chronic  
38 Fatigue Syndrome (ME/CFS) following the first pandemic wave in Germany – a first  
39 analysis of a prospective observational study: Cold Spring Harbor Laboratory, 2021.  
40 47. Chalder T, Berelowitz G, Pawlikowska T, et al. Development of a fatigue scale. *J*  
41 *Psychosom Res* 1993;37(2):147-53. doi: 10.1016/0022-3999(93)90081-p [published  
42 Online First: 1993/01/01]  
43 48. Varni JW, Burwinkle TM, Katz ER, et al. The PedsQL in pediatric cancer: reliability and  
44 validity of the Pediatric Quality of Life Inventory Generic Core Scales,  
45 Multidimensional Fatigue Scale, and Cancer Module. *Cancer* 2002;94(7):2090-106.  
46 doi: 10.1002/cncr.10428 [published Online First: 2002/04/05]  
47 49. Daniel LC, Brumley LD, Schwartz LA. Fatigue in adolescents with cancer compared to  
48 healthy adolescents. *Pediatr Blood Cancer* 2013;60(11):1902-7. doi:  
49 10.1002/psc.24706 [published Online First: 2013/07/31]  
50 50. Varni JW, Burwinkle TM, Szer IS. The PedsQL Multidimensional Fatigue Scale in  
51 pediatric rheumatology: reliability and validity. *J Rheumatol* 2004;31(12):2494-500.  
52 [published Online First: 2004/12/01]  
53 51. Varni JW, Limbers CA. The PedsQL Multidimensional Fatigue Scale in young adults:  
54 feasibility, reliability and validity in a University student population. *Qual Life Res*  
55 2008;17(1):105-14. doi: 10.1007/s11136-007-9282-5 [published Online First:  
56 2007/11/21]  
57  
58  
59  
60



52. Varni JW, Limbers CA, Bryant WP, et al. The PedsQL Multidimensional Fatigue Scale in type 1 diabetes: feasibility, reliability, and validity. *Pediatr Diabetes* 2009;10(5):321-8. doi: 10.1111/j.1399-5448.2008.00482.x [published Online First: 2008/12/11]
53. Varni JW, Limbers CA, Bryant WP, et al. The PedsQL multidimensional fatigue scale in pediatric obesity: feasibility, reliability and validity. *Int J Pediatr Obes* 2010;5(1):34-42. doi: 10.3109/17477160903111706 [published Online First: 2009/07/14]
54. Varni JW, Limbers CA, Bryant WP, et al. Assessment of Fatigue in Pediatric Patients With Short Stature Utilizing the PedsQL™ Multidimensional Fatigue Scale. *Children's Health Care* 2012;41(2):162-81. doi: 10.1080/02739615.2012.657068
55. Varni JW, Beaujean AA, Limbers CA. Factorial invariance of pediatric patient self-reported fatigue across age and gender: a multigroup confirmatory factor analysis approach utilizing the PedsQL Multidimensional Fatigue Scale. *Qual Life Res* 2013;22(9):2581-94. doi: 10.1007/s11136-013-0370-4 [published Online First: 2013/02/21]
56. Panepinto JA, Torres S, Bendo CB, et al. PedsQL Multidimensional Fatigue Scale in sickle cell disease: feasibility, reliability, and validity. *Pediatr Blood Cancer* 2014;61(1):171-7. doi: 10.1002/pbc.24776 [published Online First: 2013/09/17]
57. Schriever VA, Agosin E, Altundag A, et al. Development of an International Odor Identification Test for Children: The Universal Sniff Test. *J Pediatr* 2018;198:265-72 e3. doi: 10.1016/j.jpeds.2018.03.011 [published Online First: 2018/05/08]
58. Gellrich J, Sparing-Paschke LM, Thieme T, et al. Normative data for olfactory threshold and odor identification in children and adolescents. *Int J Pediatr Otorhinolaryngol* 2019;123:5-9. doi: 10.1016/j.ijporl.2019.01.009 [published Online First: 2019/05/06]
59. Jones PW, Quirk FH, Baveystock CM. The St George's Respiratory Questionnaire. *Respir Med* 1991;85 Suppl B:25-31; discussion 33-7. doi: 10.1016/s0954-6111(06)80166-6 [published Online First: 1991/09/01]
60. Kroenke K, Spitzer RL, Williams JB. The PHQ-9: validity of a brief depression severity measure. *J Gen Intern Med* 2001;16(9):606-13. doi: 10.1046/j.1525-1497.2001.016009606.x [published Online First: 2001/09/15]
61. Blevins CA, Weathers FW, Davis MT, et al. The Posttraumatic Stress Disorder Checklist for DSM-5 (PCL-5): Development and Initial Psychometric Evaluation. *J Trauma Stress* 2015;28(6):489-98. doi: 10.1002/jts.22059 [published Online First: 2015/11/26]
62. Ravens-Sieberer U, Bullinger M. Assessing health-related quality of life in chronically ill children with the German KINDL: first psychometric and content analytical results. *Qual Life Res* 1998;7(5):399-407. doi: 10.1023/a:1008853819715 [published Online First: 1998/08/06]
63. Organization WH. COVID-19 Clinical management: living guidance.
64. Characterisation WHOWGotC, Management of C-i. A minimal common outcome measure set for COVID-19 clinical research. *Lancet Infect Dis* 2020;20(8):e192-e97. doi: 10.1016/S1473-3099(20)30483-7 [published Online First: 2020/06/17]
65. Corman VM, Landt O, Kaiser M, et al. Detection of 2019 novel coronavirus (2019-nCoV) by real-time RT-PCR. *Euro Surveill* 2020;25(3) doi: 10.2807/1560-7917.ES.2020.25.3.2000045 [published Online First: 2020/01/30]
66. Wolfel R, Corman VM, Guggemos W, et al. Virological assessment of hospitalized patients with COVID-2019. *Nature* 2020;581(7809):465-69. doi: 10.1038/s41586-020-2196-x [published Online First: 2020/04/03]
67. Liu X, Krawczyk E, Supryniewicz FA, et al. Conditional reprogramming and long-term expansion of normal and tumor cells from human biospecimens. *Nat Protoc* 2017;12(2):439-51. doi: 10.1038/nprot.2016.174 [published Online First: 2017/01/27]
68. Liu X, Ory V, Chapman S, et al. ROCK inhibitor and feeder cells induce the conditional reprogramming of epithelial cells. *Am J Pathol* 2012;180(2):599-607. doi: 10.1016/j.ajpath.2011.10.036 [published Online First: 2011/12/23]
69. Chapman S, Liu X, Meyers C, et al. Human keratinocytes are efficiently immortalized by a Rho kinase inhibitor. *J Clin Invest* 2010;120(7):2619-26. doi: 10.1172/JCI42297 [published Online First: 2010/06/03]

- 1
  - 2
  - 3
  - 4
  - 5
  - 6
  - 7
  - 8
  - 9
  - 10
  - 11
  - 12
  - 13
  - 14
  - 15
  - 16
  - 17
  - 18
  - 19
  - 20
  - 21
  - 22
  - 23
  - 24
  - 25
  - 26
  - 27
  - 28
  - 29
  - 30
  - 31
  - 32
  - 33
  - 34
  - 35
  - 36
  - 37
  - 38
  - 39
  - 40
  - 41
  - 42
  - 43
  - 44
  - 45
  - 46
  - 47
  - 48
  - 49
  - 50
  - 51
  - 52
  - 53
  - 54
  - 55
  - 56
  - 57
  - 58
  - 59
  - 60
70. Gentsch M, Boyles SE, Chelvaraju C, et al. Pharmacological Rescue of Conditionally Reprogrammed Cystic Fibrosis Bronchial Epithelial Cells. *Am J Respir Cell Mol Biol* 2017;56(5):568-74. doi: 10.1165/rcmb.2016-0276MA [published Online First: 2016/12/17]
71. Salomon JJ, Albrecht T, Graeber SY, et al. Chronic rhinosinusitis with nasal polyps is associated with impaired TMEM16A-mediated epithelial chloride secretion. *J Allergy Clin Immunol* 2021;147(6):2191-201 e2. doi: 10.1016/j.jaci.2021.02.008 [published Online First: 2021/02/21]
72. Schulze J, Mache C, Balazs A, et al. Analysis of Severe Acute Respiratory Syndrome 2 Replication in Explant Cultures of the Human Upper Respiratory Tract Reveals Broad Tissue Tropism of Wild-Type and B.1.1.7 Variant Viruses. *J Infect Dis* 2021;224(12):2020-24. doi: 10.1093/infdis/jiab523 [published Online First: 2021/10/16]
73. Martinovich KM, Iosifidis T, Buckley AG, et al. Conditionally reprogrammed primary airway epithelial cells maintain morphology, lineage and disease specific functional characteristics. *Sci Rep* 2017;7(1):17971. doi: 10.1038/s41598-017-17952-4 [published Online First: 2017/12/23]
74. Bove PF, Dang H, Chelvaraju C, et al. Breaking the in vitro alveolar type II cell proliferation barrier while retaining ion transport properties. *Am J Respir Cell Mol Biol* 2014;50(4):767-76. doi: 10.1165/rcmb.2013-0071OC [published Online First: 2013/11/07]
75. Mall MA, Button B, Johannesson B, et al. Airway surface liquid volume regulation determines different airway phenotypes in liddle compared with betaENaC-overexpressing mice. *J Biol Chem* 2010;285(35):26945-55. doi: 10.1074/jbc.M110.151803 [published Online First: 2010/06/23]
76. Liu X, Wu Y, Rong L. Conditionally Reprogrammed Human Normal Airway Epithelial Cells at ALI: A Physiological Model for Emerging Viruses. *Viral Sin* 2020;35(3):280-89. doi: 10.1007/s12250-020-00244-z [published Online First: 2020/06/20]
77. Duerr J, Leitz DHW, Szczygiel M, et al. Conditional deletion of Nedd4-2 in lung epithelial cells causes progressive pulmonary fibrosis in adult mice. *Nat Commun* 2020;11(1):2012. doi: 10.1038/s41467-020-15743-6 [published Online First: 2020/04/26]
78. Bandura DR, Baranov VI, Ornatsky OI, et al. Mass cytometry: technique for real time single cell multitarget immunoassay based on inductively coupled plasma time-of-flight mass spectrometry. *Anal Chem* 2009;81(16):6813-22. doi: 10.1021/ac901049w [published Online First: 2009/07/16]
79. Messner CB, Demichev V, Wendisch D, et al. Ultra-High-Throughput Clinical Proteomics Reveals Classifiers of COVID-19 Infection. *Cell Syst* 2020;11(1):11-24 e4. doi: 10.1016/j.cels.2020.05.012 [published Online First: 2020/07/04]
80. Demichev V, Messner CB, Vernardis SI, et al. DIA-NN: neural networks and interference correction enable deep proteome coverage in high throughput. *Nat Methods* 2020;17(1):41-44. doi: 10.1038/s41592-019-0638-x [published Online First: 2019/11/27]
81. Sungnak W, Huang N, Becavin C, et al. SARS-CoV-2 entry factors are highly expressed in nasal epithelial cells together with innate immune genes. *Nat Med* 2020;26(5):681-87. doi: 10.1038/s41591-020-0868-6 [published Online First: 2020/04/25]
82. Chua RL, Lukassen S, Trump S, et al. COVID-19 severity correlates with airway epithelium-immune cell interactions identified by single-cell analysis. *Nat Biotechnol* 2020;38(8):970-79. doi: 10.1038/s41587-020-0602-4 [published Online First: 2020/06/28]
83. Mitchell WB. Thromboinflammation in COVID-19 acute lung injury. *Paediatr Respir Rev* 2020;35:20-24. doi: 10.1016/j.prrv.2020.06.004 [published Online First: 2020/07/13]
84. Stahl M, Joachim C, Blessing K, et al. Multiple breath washout is feasible in the clinical setting and detects abnormal lung function in infants and young children with cystic fibrosis. *Respiration* 2014;87(5):357-63. doi: 10.1159/000357075 [published Online First: 2014/01/18]

- 1  
2  
3 85. Stahl M, Joachim C, Kirsch I, et al. Multicentre feasibility of multiple-breath washout in  
4 preschool children with cystic fibrosis and other lung diseases. *ERJ Open Res*  
5 2020;6(4) doi: 10.1183/23120541.00408-2020 [published Online First: 2020/12/03]  
6  
7 86. Beydon N, Davis SD, Lombardi E, et al. An official American Thoracic Society/European  
8 Respiratory Society statement: pulmonary function testing in preschool children. *Am J*  
9 *Respir Crit Care Med* 2007;175(12):1304-45. doi: 10.1164/rccm.200605-642ST  
10 [published Online First: 2007/06/05]  
11  
12 87. Saunders C, Jensen R, Robinson PD, et al. Integrating the multiple breath washout test  
13 into international multicentre trials. *J Cyst Fibros* 2020;19(4):602-07. doi:  
14 10.1016/j.jcf.2019.11.006 [published Online First: 2019/11/28]  
15  
16 88. Wilkinson MD, Dumontier M, Aalbersberg IJ, et al. The FAIR Guiding Principles for  
17 scientific data management and stewardship. *Sci Data* 2016;3:160018. doi:  
18 10.1038/sdata.2016.18 [published Online First: 2016/03/16]  
19  
20 89. Zimmermann P, Curtis N. Coronavirus Infections in Children Including COVID-19: An  
21 Overview of the Epidemiology, Clinical Features, Diagnosis, Treatment and  
22 Prevention Options in Children. *Pediatr Infect Dis J* 2020;39(5):355-68. doi:  
23 10.1097/INF.0000000000002660 [published Online First: 2020/04/21]  
24  
25 90. Stephenson E, Reynolds G, Botting RA, et al. Single-cell multi-omics analysis of the  
26 immune response in COVID-19. *Nat Med* 2021;27(5):904-16. doi: 10.1038/s41591-  
27 021-01329-2 [published Online First: 2021/04/22]  
28  
29 91. Bernardes JP, Mishra N, Tran F, et al. Longitudinal Multi-omics Analyses Identify  
30 Responses of Megakaryocytes, Erythroid Cells, and Plasmablasts as Hallmarks of  
31 Severe COVID-19. *Immunity* 2020;53(6):1296-314 e9. doi:  
32 10.1016/j.immuni.2020.11.017 [published Online First: 2020/12/10]  
33  
34 92. Trump S, Lukassen S, Anker MS, et al. Hypertension delays viral clearance and  
35 exacerbates airway hyperinflammation in patients with COVID-19. *Nat Biotechnol*  
36 2021;39(6):705-16. doi: 10.1038/s41587-020-00796-1 [published Online First:  
37 2020/12/29]  
38  
39 93. Stukalov A, Girault V, Grass V, et al. Multilevel proteomics reveals host perturbations by  
40 SARS-CoV-2 and SARS-CoV. *Nature* 2021;594(7862):246-52. doi: 10.1038/s41586-  
41 021-03493-4 [published Online First: 2021/04/13]  
42  
43 94. Wang C, Li X, Ning W, et al. Multi-omic profiling of plasma reveals molecular alterations  
44 in children with COVID-19. *Theranostics* 2021;11(16):8008-26. doi:  
45 10.7150/thno.61832 [published Online First: 2021/08/03]  
46  
47 95. Pierce CA, Preston-Hurlburt P, Dai Y, et al. Immune responses to SARS-CoV-2 infection  
48 in hospitalized pediatric and adult patients. *Sci Transl Med* 2020;12(564) doi:  
49 10.1126/scitranslmed.abd5487 [published Online First: 2020/09/23]  
50  
51 96. Cohen CA, Li APY, Hachim A, et al. SARS-CoV-2 specific T cell responses are lower in  
52 children and increase with age and time after infection. *Nat Commun*  
53 2021;12(1):4678. doi: 10.1038/s41467-021-24938-4 [published Online First:  
54 2021/07/31]  
55  
56  
57  
58  
59  
60

### Figure 1. Performed analyses in the RECAST study

The RECAST study consist of 8 elements, including the anamnesis and clinical data, a comprehensive multi-omics workup of the immune landscape of the blood and the upper airways and lung function testing.

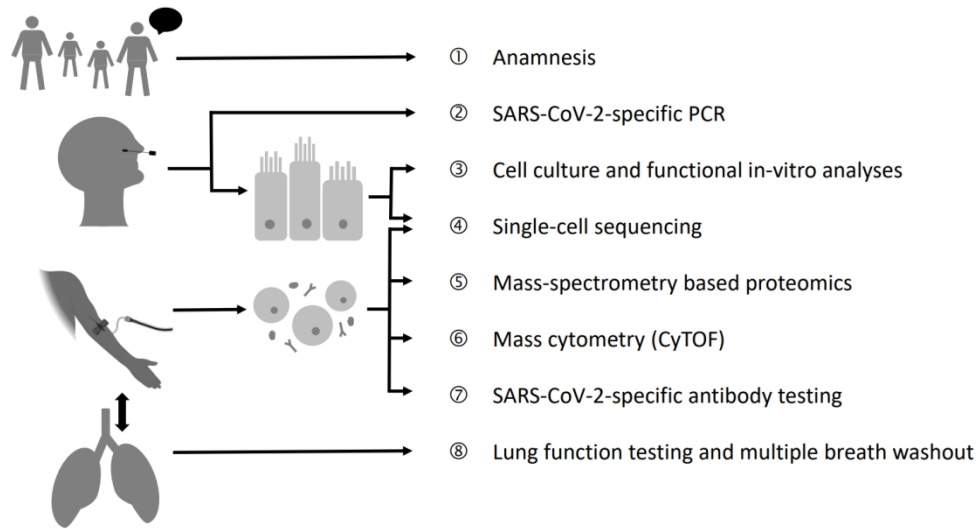

Figure 1. Performed analyses in the RECAST study

The RECAST study consist of 8 elements, including the anamnesis and clinical data, a comprehensive multi-omics workup of the immune landscape of the blood and the upper airways and lung function testing.

413x226mm (96 x 96 DPI)

1  
2  
3 **Appendix, table E1. Assessed data.**  
4  
5

| Assessed data                                                                                                                                                                                                               | Item list                                                                                                                                                                                                                                                                                                                                                                                                                                                                                                                                                                                                                                                                                                            |
|-----------------------------------------------------------------------------------------------------------------------------------------------------------------------------------------------------------------------------|----------------------------------------------------------------------------------------------------------------------------------------------------------------------------------------------------------------------------------------------------------------------------------------------------------------------------------------------------------------------------------------------------------------------------------------------------------------------------------------------------------------------------------------------------------------------------------------------------------------------------------------------------------------------------------------------------------------------|
| Family constellation                                                                                                                                                                                                        |                                                                                                                                                                                                                                                                                                                                                                                                                                                                                                                                                                                                                                                                                                                      |
| Biometric information, including sex at birth, body height, body weight, ethnicity, number of children and grand-children and profession                                                                                    |                                                                                                                                                                                                                                                                                                                                                                                                                                                                                                                                                                                                                                                                                                                      |
| Tests for SARS-CoV-2 in the last 4 weeks, including type, date and result                                                                                                                                                   |                                                                                                                                                                                                                                                                                                                                                                                                                                                                                                                                                                                                                                                                                                                      |
| Vaccination against SARS-CoV-2, including manufacturer, date(s) and symptoms after vaccination                                                                                                                              |                                                                                                                                                                                                                                                                                                                                                                                                                                                                                                                                                                                                                                                                                                                      |
| Temporal course of infection in the family                                                                                                                                                                                  |                                                                                                                                                                                                                                                                                                                                                                                                                                                                                                                                                                                                                                                                                                                      |
| Index case and assumed point of infection                                                                                                                                                                                   |                                                                                                                                                                                                                                                                                                                                                                                                                                                                                                                                                                                                                                                                                                                      |
| Information about household, including number of household members, pet animals and information about smoking (including smoked substances)                                                                                 |                                                                                                                                                                                                                                                                                                                                                                                                                                                                                                                                                                                                                                                                                                                      |
| Paediatric anamnesis, including biological parents and legal parents, gestational week at birth, problems during pregnancy, birth and perinatal period, childcare or daycare or school or training, previous RSV infections |                                                                                                                                                                                                                                                                                                                                                                                                                                                                                                                                                                                                                                                                                                                      |
| Medical conditions and therapy, including smoking (including substance and length), atopic disposition, allergies, asthma and previous hospitalizations                                                                     |                                                                                                                                                                                                                                                                                                                                                                                                                                                                                                                                                                                                                                                                                                                      |
| Symptoms (including duration) as listed and symptom severity according to WHO scales                                                                                                                                        | Fever or elevated temperature, exhaustion and fatigue, loss of appetite, dizziness, diarrhea, nausea, vomiting, impaired sense of taste or smell, rhinorrhea, congested nose, sneezing, unproductive cough, productive cough, shortness of breath, headache, abdominal pain, sore throat, muscle ache, chest pain, ear pain, joint pain, conjunctivitis, lymphadenitis, skin efflorescence, shivering, paresis, impaired consciousness                                                                                                                                                                                                                                                                               |
| Hygiene measures to prevent spreading of disease                                                                                                                                                                            |                                                                                                                                                                                                                                                                                                                                                                                                                                                                                                                                                                                                                                                                                                                      |
| Ability to smell, including parosmia                                                                                                                                                                                        |                                                                                                                                                                                                                                                                                                                                                                                                                                                                                                                                                                                                                                                                                                                      |
| Consequences of SARS-CoV-2 infection, including hospitalization, concomitant disease(s) and treatment                                                                                                                       |                                                                                                                                                                                                                                                                                                                                                                                                                                                                                                                                                                                                                                                                                                                      |
| Symptoms of Post-COVID or fatigue as listed, including their duration, whether dependent in occurrence or intensity on physical or mental stress or posture                                                                 | Pain, nausea, vomiting, lymphadenitis, loss of appetite, abdominal complaint(s), loss of smell or taste, palpitation, shortness of breath, coughing, fever, skin efflorescence, conjunctivitis, hair loss, reddening or swelling of hand or feet, reddening or swelling of tongue, lips or cheeks, exhaustion or fatigue, reduced physical and exercise capacity, sleep ineffectivity, disturbed sleeping rhythm, disturbed sleep duration, mood disturbance, cognitive impairment, behavioral changes, sadness or depression, restlessness or excitement, orthostatic dysregulation, increased sensibility to triggers, such as light, noise, smell, touch or others, impaired adaptability to cold, heat or others |



STROBE Statement—checklist of items that should be included in reports of observational studies

|                           | Item No. | Recommendation                                                                                                                                                                                                                                                                                                                                                                                                                                                         | Page No. | Relevant text from manuscript |
|---------------------------|----------|------------------------------------------------------------------------------------------------------------------------------------------------------------------------------------------------------------------------------------------------------------------------------------------------------------------------------------------------------------------------------------------------------------------------------------------------------------------------|----------|-------------------------------|
| <b>Title and abstract</b> | 1        | (a) Indicate the study’s design with a commonly used term in the title or the abstract                                                                                                                                                                                                                                                                                                                                                                                 | 1        | observational study           |
|                           |          | (b) Provide in the abstract an informative and balanced summary of what was done and what was found                                                                                                                                                                                                                                                                                                                                                                    | 4        |                               |
| <b>Introduction</b>       |          |                                                                                                                                                                                                                                                                                                                                                                                                                                                                        |          |                               |
| Background/rationale      | 2        | Explain the scientific background and rationale for the investigation being reported                                                                                                                                                                                                                                                                                                                                                                                   | 5, 6     |                               |
| Objectives                | 3        | State specific objectives, including any prespecified hypotheses                                                                                                                                                                                                                                                                                                                                                                                                       | 7        |                               |
| <b>Methods</b>            |          |                                                                                                                                                                                                                                                                                                                                                                                                                                                                        |          |                               |
| Study design              | 4        | Present key elements of study design early in the paper                                                                                                                                                                                                                                                                                                                                                                                                                | 8        |                               |
| Setting                   | 5        | Describe the setting, locations, and relevant dates, including periods of recruitment, exposure, follow-up, and data collection                                                                                                                                                                                                                                                                                                                                        | 8 - 10   |                               |
| Participants              | 6        | (a) <i>Cohort study</i> —Give the eligibility criteria, and the sources and methods of selection of participants. Describe methods of follow-up<br><i>Case-control study</i> —Give the eligibility criteria, and the sources and methods of case ascertainment and control selection. Give the rationale for the choice of cases and controls<br><i>Cross-sectional study</i> —Give the eligibility criteria, and the sources and methods of selection of participants | 9 - 10   |                               |
|                           |          | (b) <i>Cohort study</i> —For matched studies, give matching criteria and number of exposed and unexposed<br><i>Case-control study</i> —For matched studies, give matching criteria and the number of controls per case                                                                                                                                                                                                                                                 |          |                               |

1  
2  
3  
4  
5  
6  
7  
8  
9  
10  
11  
12  
13  
14  
15  
16  
17  
18  
19  
20  
21  
22  
23  
24  
25  
26  
27  
28  
29  
30  
31  
32  
33  
34  
35  
36  
37  
38  
39  
40  
41  
42  
43  
44  
45  
46

|                              |    |                                                                                                                                                                                                                                                                                                                                                                                                                                                                                                                                                                                               |                                                             |
|------------------------------|----|-----------------------------------------------------------------------------------------------------------------------------------------------------------------------------------------------------------------------------------------------------------------------------------------------------------------------------------------------------------------------------------------------------------------------------------------------------------------------------------------------------------------------------------------------------------------------------------------------|-------------------------------------------------------------|
| Variables                    | 7  | Clearly define all outcomes, exposures, predictors, potential confounders, and effect modifiers. Give diagnostic criteria, if applicable                                                                                                                                                                                                                                                                                                                                                                                                                                                      | 10 - 13                                                     |
| Data sources/<br>measurement | 8* | For each variable of interest, give sources of data and details of methods of assessment (measurement). Describe comparability of assessment methods if there is more than one group                                                                                                                                                                                                                                                                                                                                                                                                          | 10 - 13                                                     |
| Bias                         | 9  | Describe any efforts to address potential sources of bias                                                                                                                                                                                                                                                                                                                                                                                                                                                                                                                                     | NA<br>study not<br>terminated, no<br>data interpretation    |
| Study size                   | 10 | Explain how the study size was arrived at                                                                                                                                                                                                                                                                                                                                                                                                                                                                                                                                                     | NA<br>study not<br>terminated,<br>no data<br>interpretation |
| Quantitative variables       | 11 | Explain how quantitative variables were handled in the analyses. If applicable, describe which groupings were chosen and why                                                                                                                                                                                                                                                                                                                                                                                                                                                                  | NA<br>study not<br>terminated,<br>no data<br>interpretation |
| Statistical methods          | 12 | <p>(a) Describe all statistical methods, including those used to control for confounding</p> <p>(b) Describe any methods used to examine subgroups and interactions</p> <p>(c) Explain how missing data were addressed</p> <p>(d) <i>Cohort study</i>—If applicable, explain how loss to follow-up was addressed</p> <p><i>Case-control study</i>—If applicable, explain how matching of cases and controls was addressed</p> <p><i>Cross-sectional study</i>—If applicable, describe analytical methods taking account of sampling strategy</p> <p>(e) Describe any sensitivity analyses</p> | NA<br>study not<br>terminated,<br>no data<br>interpretation |

1  
2  
3  
4  
5  
6  
7  
8  
9  
10  
11  
12  
13  
14  
15  
16  
17  
18  
19  
20  
21  
22  
23  
24  
25  
26  
27  
28  
29  
30  
31  
32  
33  
34  
35  
36  
37  
38  
39  
40  
41  
42  
43  
44  
45  
46

|                   |     |                                                                                                                                                                                                                                                                                                                                                                                                               |                                                       |
|-------------------|-----|---------------------------------------------------------------------------------------------------------------------------------------------------------------------------------------------------------------------------------------------------------------------------------------------------------------------------------------------------------------------------------------------------------------|-------------------------------------------------------|
| Participants      | 13* | (a) Report numbers of individuals at each stage of study—eg numbers potentially eligible, examined for eligibility, confirmed eligible, included in the study, completing follow-up, and analysed<br>(b) Give reasons for non-participation at each stage<br>(c) Consider use of a flow diagram                                                                                                               | NA<br>study not terminated,<br>no data interpretation |
| Descriptive data  | 14* | (a) Give characteristics of study participants (eg demographic, clinical, social) and information on exposures and potential confounders<br>(b) Indicate number of participants with missing data for each variable of interest<br>(c) <i>Cohort study</i> —Summarise follow-up time (eg, average and total amount)                                                                                           |                                                       |
| Outcome data      | 15* | <i>Cohort study</i> —Report numbers of outcome events or summary measures over time<br><i>Case-control study</i> —Report numbers in each exposure category, or summary measures of exposure<br><i>Cross-sectional study</i> —Report numbers of outcome events or summary measures                                                                                                                             |                                                       |
| Main results      | 16  | (a) Give unadjusted estimates and, if applicable, confounder-adjusted estimates and their precision (eg, 95% confidence interval). Make clear which confounders were adjusted for and why they were included<br>(b) Report category boundaries when continuous variables were categorized<br>(c) If relevant, consider translating estimates of relative risk into absolute risk for a meaningful time period |                                                       |
| Other analyses    | 17  | Report other analyses done—eg analyses of subgroups and interactions, and sensitivity analyses                                                                                                                                                                                                                                                                                                                |                                                       |
| <b>Discussion</b> |     |                                                                                                                                                                                                                                                                                                                                                                                                               |                                                       |
| Key results       | 18  | Summarise key results with reference to study objectives                                                                                                                                                                                                                                                                                                                                                      | 14                                                    |
| Limitations       | 19  | Discuss limitations of the study, taking into account sources of potential bias or imprecision. Discuss both direction and magnitude of any potential bias                                                                                                                                                                                                                                                    | 14 - 15                                               |
| Interpretation    | 20  | Give a cautious overall interpretation of results considering objectives, limitations, multiplicity of analyses, results from similar studies, and other relevant evidence                                                                                                                                                                                                                                    | 15                                                    |
| Generalisability  | 21  | Discuss the generalisability (external validity) of the study results                                                                                                                                                                                                                                                                                                                                         | NA<br>study not terminated,<br>no data interpretation |

---

**Other information**

---

|         |    |                                                                                                                                                               |    |
|---------|----|---------------------------------------------------------------------------------------------------------------------------------------------------------------|----|
| Funding | 22 | Give the source of funding and the role of the funders for the present study and, if applicable, for the original study on which the present article is based | 15 |
|---------|----|---------------------------------------------------------------------------------------------------------------------------------------------------------------|----|

---

\*Give information separately for cases and controls in case-control studies and, if applicable, for exposed and unexposed groups in cohort and cross-sectional studies.

**Note:** An Explanation and Elaboration article discusses each checklist item and gives methodological background and published examples of transparent reporting. The STROBE checklist is best used in conjunction with this article (freely available on the Web sites of PLoS Medicine at <http://www.plosmedicine.org/>, Annals of Internal Medicine at <http://www.annals.org/>, and Epidemiology at <http://www.epidem.com/>). Information on the STROBE Initiative is available at [www.strobe-statement.org](http://www.strobe-statement.org).

# BMJ Open

## RECAST: An observational study for the understanding of the increased REsilience of Children compared to Adults in SARS-CoV-2 infection

|                                 |                                                                                                                                                                                                                                                                                                                                                                                                                                                                                                                                                                                                                                                                                                                                                                                                                                                                                                                                                                                                                                                                                                                                                                                                                                                                                                                                                                                                                                                                                                                                                                                                                                                                                                                                                                                                                                                                                                                                                                                                                                                                                                                                                                                                                        |
|---------------------------------|------------------------------------------------------------------------------------------------------------------------------------------------------------------------------------------------------------------------------------------------------------------------------------------------------------------------------------------------------------------------------------------------------------------------------------------------------------------------------------------------------------------------------------------------------------------------------------------------------------------------------------------------------------------------------------------------------------------------------------------------------------------------------------------------------------------------------------------------------------------------------------------------------------------------------------------------------------------------------------------------------------------------------------------------------------------------------------------------------------------------------------------------------------------------------------------------------------------------------------------------------------------------------------------------------------------------------------------------------------------------------------------------------------------------------------------------------------------------------------------------------------------------------------------------------------------------------------------------------------------------------------------------------------------------------------------------------------------------------------------------------------------------------------------------------------------------------------------------------------------------------------------------------------------------------------------------------------------------------------------------------------------------------------------------------------------------------------------------------------------------------------------------------------------------------------------------------------------------|
| Journal:                        | <i>BMJ Open</i>                                                                                                                                                                                                                                                                                                                                                                                                                                                                                                                                                                                                                                                                                                                                                                                                                                                                                                                                                                                                                                                                                                                                                                                                                                                                                                                                                                                                                                                                                                                                                                                                                                                                                                                                                                                                                                                                                                                                                                                                                                                                                                                                                                                                        |
| Manuscript ID                   | bmjopen-2022-065221.R1                                                                                                                                                                                                                                                                                                                                                                                                                                                                                                                                                                                                                                                                                                                                                                                                                                                                                                                                                                                                                                                                                                                                                                                                                                                                                                                                                                                                                                                                                                                                                                                                                                                                                                                                                                                                                                                                                                                                                                                                                                                                                                                                                                                                 |
| Article Type:                   | Protocol                                                                                                                                                                                                                                                                                                                                                                                                                                                                                                                                                                                                                                                                                                                                                                                                                                                                                                                                                                                                                                                                                                                                                                                                                                                                                                                                                                                                                                                                                                                                                                                                                                                                                                                                                                                                                                                                                                                                                                                                                                                                                                                                                                                                               |
| Date Submitted by the Author:   | 09-Mar-2023                                                                                                                                                                                                                                                                                                                                                                                                                                                                                                                                                                                                                                                                                                                                                                                                                                                                                                                                                                                                                                                                                                                                                                                                                                                                                                                                                                                                                                                                                                                                                                                                                                                                                                                                                                                                                                                                                                                                                                                                                                                                                                                                                                                                            |
| Complete List of Authors:       | <p>Stricker, Sebastian; Charité Universitätsmedizin Berlin, Department of Pediatric Respiratory Medicine, Immunology and Critical Care Medicine<br/> Ziegahn, Niklas; Charité Universitätsmedizin Berlin<br/> Karsten, Martin; Karsten, Rugo, Wagner, paediatric practice<br/> Boeckel, Thomas; Boeckel, Haverkaemper, paediatric practice and practice for paediatric cardiology<br/> Stich-Boeckel, Heike; Stich-Boeckel, paediatric practice<br/> Maske, Jakob; Maske, Pankok, paediatric practice<br/> Rugo, Evelyn; Karsten, Rugo, Wagner, paediatric practice<br/> Balazs, Anita; Charité Universitätsmedizin Berlin, Department of Paediatric Respiratory Medicine, Immunology and Critical Care Medicine<br/> Millar Büchner, Pamela ; Charité Universitätsmedizin Berlin, Department of Paediatric Respiratory Medicine, Immunology and Critical Care Medicine<br/> Dang-Heine, Chantip; Berlin Institute of Health at Charité, Clinical Study Center (CSC)<br/> Schriever, Valentin; Charité Universitätsmedizin Berlin, Department of Paediatric Neurology; Charité Universitätsmedizin Berlin, Center for Chronically Sick Children (Sozialpädiatrisches Zentrum, SPZ)<br/> Eils, Roland; Berlin Institute of Health at Charité, Center for Digital Health; Berlin Institute of Health at Charité, Molecular Epidemiology Unit<br/> Lehmann, Irina; Berlin Institute of Health at Charité, Center for Digital Health; German Center for Lung Research<br/> Sander, Leif Erik; Charité Universitätsmedizin Berlin, Department of Infectious Diseases and Respiratory Medicine<br/> Ralsler, Markus; Charité Universitätsmedizin Berlin, Department of Biochemistry; The Francis Crick Institute, Molecular Biology of Metabolism Laboratory<br/> Corman, Victor; Charité Universitätsmedizin Berlin, Institute of Virology<br/> Mall, Marcus; Charité Universitätsmedizin Berlin; German Center for Lung Research<br/> Sawitzki, Birgit; Charité Universitätsmedizin Berlin; Berlin Institute of Health at Charité<br/> Roehmel, Jobst; Charité Universitätsmedizin Berlin, Department of Paediatric Respiratory Medicine, Immunology and Critical Care Medicine; Berlin Institute of Health at Charite</p> |
| <b>Primary Subject Heading</b>: | Paediatrics                                                                                                                                                                                                                                                                                                                                                                                                                                                                                                                                                                                                                                                                                                                                                                                                                                                                                                                                                                                                                                                                                                                                                                                                                                                                                                                                                                                                                                                                                                                                                                                                                                                                                                                                                                                                                                                                                                                                                                                                                                                                                                                                                                                                            |

1  
2  
3  
4  
5  
6  
7  
8  
9  
10  
11  
12  
13  
14  
15  
16  
17  
18  
19  
20  
21  
22  
23  
24  
25  
26  
27  
28  
29  
30  
31  
32  
33  
34  
35  
36  
37  
38  
39  
40  
41  
42  
43  
44  
45  
46  
47  
48  
49  
50  
51  
52  
53  
54  
55  
56  
57  
58  
59  
60

|                            |                                                     |
|----------------------------|-----------------------------------------------------|
| Secondary Subject Heading: | Infectious diseases, Immunology (including allergy) |
| Keywords:                  | IMMUNOLOGY, PAEDIATRICS, VIROLOGY                   |
|                            |                                                     |

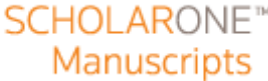

1  
2  
3 **RECAST: An observational study for the understanding of the increased RESilience of**  
4  
5 **Children compared to Adults in SARS-CoV-2 infection**  
6  
7

8 Sebastian Stricker<sup>1</sup>, Niklas Ziegahn<sup>1</sup>, Martin Karsten<sup>2</sup>, Thomas Boeckel<sup>3</sup>, Heike Stich-Boeckel<sup>4</sup>,  
9  
10 Jakob Maske<sup>5</sup>, Evelyn Rugo<sup>2</sup>, Anita Balázs<sup>1</sup>, Pamela Millar Büchner<sup>1</sup>, Chantip Dang-Heine<sup>6</sup>,  
11  
12 Valentin Alexander Schriever<sup>7,8</sup>, Roland Eils<sup>9, 10</sup>, Irina Lehmann<sup>11, 12</sup>, Leif Erik Sander<sup>13</sup>, Markus  
13  
14 Ralser<sup>14,15</sup>, Victor Max Corman<sup>16</sup>, Marcus A. Mall<sup>1,12</sup>, Birgit Sawitzki<sup>17,18</sup>, Jobst Roehmel<sup>1,18</sup>  
15  
16  
17  
18  
19  
20

21 **Affiliations:**  
22  
23

- 24 1. Charité – Universitätsmedizin Berlin, Department of Paediatric Respiratory Medicine,  
25 Immunology and Critical Care Medicine, Augustenburger Platz 1, 13353 Berlin, Germany.  
26  
27 2. Karsten, Rugo, Wagner, paediatric practice, Aßmannshauer Str. 11a, 14197 Berlin,  
28 Germany.  
29  
30 3. Boeckel, Haverkaemper, paediatric practice and practice for paediatric cardiology, Prager  
31 Straße 10, 10779 Berlin, Germany.  
32  
33 4. Stich-Boeckel, paediatric practice, Hauptstr. 132, 10827 Berlin, Germany.  
34  
35 5. Maske, Pankok, paediatric practice, Goebenstraße 24, 10783, Berlin, Germany.  
36  
37 6. Clinical Study Center (CSC), Berlin Institute of Health at the Charité - Universitätsmedizin  
38 Berlin, Augustenburger Platz 1, 13353 Berlin, Germany.  
39  
40 7. Charité – Universitätsmedizin Berlin, Department of Paediatric Neurology,  
41 Augustenburger Platz 1, 13353 Berlin, Germany.  
42  
43 8. Charité – Universitätsmedizin Berlin, Center for Chronically Sick Children  
44 (Sozialpädiatrisches Zentrum, SPZ), Augustenburger Platz 1, 13353 Berlin, Germany  
45  
46 9. Center for Digital Health, Berlin Institute of Health at the Charité – Universitätsmedizin  
47 Berlin, Augustenburger Platz 1, 13353 Berlin, Germany.  
48  
49  
50  
51  
52  
53  
54  
55  
56  
57  
58  
59  
60

- 1
- 2
- 3 10. Molecular Epidemiology Unit, Berlin Institute of Health at the Charité –
- 4
- 5       Universitätsmedizin Berlin, Augustenburger Platz 1, 13353 Berlin, Germany.
- 6
- 7 11. Center for Digital Health, Berlin Institute of Health (BIH) at the Charité –
- 8
- 9       Universitätsmedizin Berlin.
- 10
- 11
- 12 12. German Center for Lung Research (DZL), associated partner site, Berlin, Germany
- 13
- 14 13. Department of Infectious Diseases and Respiratory Medicine, Charité –
- 15
- 16       Universitätsmedizin Berlin, Augustenburger Platz 1, 13353 Berlin, Germany.
- 17
- 18 14. Molecular Biology of Metabolism Laboratory, The Francis Crick Institute, London, UK.
- 19
- 20 15. Charité – Universitätsmedizin Berlin, Department of Biochemistry, corporate member of
- 21
- 22       Freie Universität Berlin and Humboldt-Universität zu Berlin, 10117 Berlin, Germany.
- 23
- 24 16. Charité – Universitätsmedizin Berlin, Institute of Virology, Rahel-Hirsch-Weg 3, 10117
- 25
- 26       Berlin, Germany.
- 27
- 28 17. Charité – Universitätsmedizin Berlin, Institute of Medical Immunology, Augustenburger
- 29
- 30       Platz 1, 13353 Berlin, Germany.
- 31
- 32
- 33 18. Berlin Institute of Health at the Charité - Universitätsmedizin Berlin, Anna-Louisa-Karsch-
- 34
- 35       Str. 2, 10178 Berlin, Germany.
- 36
- 37
- 38
- 39
- 40

41 **Correspondence:** Dr. Jobst Roehmel, Charité – Universitätsmedizin Berlin, Department  
42 of Paediatric Respiratory Medicine, Immunology and Critical Care Medicine,  
43 Augustenburger Platz 1, 13353 Berlin, Germany. jobst.roehmel@charite.de ; Tel.: +49  
44  
45  
46  
47  
48 450 616446.

49  
50  
51 **Word count: 3012**  
52  
53  
54  
55  
56  
57  
58  
59  
60



## ARTICLE SUMMARY

**Introduction:** The SARS-CoV-2 pandemic remains a threat to public health. Soon after its outbreak, it became apparent that children are less severely affected. Indeed, opposing clinical manifestations between children and adults are observed for other infections. The SARS-CoV-2 outbreak provides the unique opportunity to study the underlying mechanisms. This protocol describes the methods of an observational study that aims to characterize age dependent differences in immune responses to primary respiratory infections using SARS-CoV-2 as a model virus and to assess age differences in clinical outcomes including lung function.

**Methods and Analysis:** The study aims to recruit at least 120 children and 60 adults that are infected with SARS-CoV-2 and collect specimen for a multi-omics analysis, including single cell RNA sequencing of nasal epithelial cells and peripheral blood mononuclear cells, mass cytometry of whole blood samples and nasal cells, mass spectrometry-based serum and plasma proteomics, nasal epithelial cultures with functional *in vitro* analyses, SARS-CoV-2 antibody testing, sequencing of the viral genome and lung function testing. Data obtained from this multi-omics approach is correlated with medical history and clinical data. Recruitment started in October 2020 and is ongoing.

**Ethics and dissemination:** The study was reviewed and approved by the Ethics Committee of Charité – Universitätsmedizin Berlin (EA2/066/20). All collected specimens are stored in the central biobank of Charité – Universitätsmedizin Berlin and are made available to all participating researchers and on request.

The study is registered at the German Clinical Trials Register with number DRKS00025715.

1  
2  
3 **Key Words:** SARS-CoV-2, children, multiple breath washout, immune response,  
4  
5  
6 resilience, multi-omics  
7  
8  
9

### 10 11 **Strengths and limitations of this study**

- 12 • Sample collection from children and adults with primary SARS-CoV-2 infection at  
13 multiple time points, however samples from severely ill patients are not included  
14
- 15 • Mass cytometry, single-cell RNA sequencing and mass spectrometry-based serum and  
16 plasma proteomics display the local and systemic immune response  
17
- 18 • Air-liquid interface cultures reproduce *in-vivo* conditions and will be used for  
19 functional studies  
20
- 21 • Analysis of clinical data and lung function testing complement the multi-omics  
22 approach  
23  
24  
25  
26  
27  
28  
29  
30  
31

### 32 33 **INTRODUCTION**

34  
35  
36  
37 In December 2019, the novel coronavirus SARS-CoV-2 emerged as cause of acute pneumonia  
38  
39 <sup>1,2</sup>. By August 2021, more than 200 million people were infected with SARS-CoV-2 <sup>3</sup>. Soon after  
40  
41 the beginning of the pandemic, it became obvious that children have an increased resilience  
42  
43 against the primary infection. The course of disease in children is more likely to be milder and  
44  
45 severe or even fatal courses remain extremely rare <sup>4-8</sup>. Various hypotheses to explain the  
46  
47 reduced susceptibility and mortality of children are currently discussed, including reduced  
48  
49 virus entry via ACE-2 in children <sup>9</sup>, pre-activated components of the immune system, such as  
50  
51 cross-reactive T cells <sup>10-13</sup> and antibodies <sup>14</sup>, or a more accentuated innate immunity in children  
52  
53 [15, 16] (table 1). Most of these findings are complementary in the explanation of the  
54  
55 observed phenomenon, however some findings are in part contradictory and require further  
56  
57  
58  
59  
60

1  
2  
3 investigation. Opposing clinical manifestations between children and adults are also observed  
4  
5 for other viral respiratory infections <sup>15 16 17</sup>. This points to major changes in the general  
6  
7 immune response pattern during aging. In the past comparative immune response analyses  
8  
9 to primary infections in various age groups were difficult to perform, as many adults had  
10  
11 already been exposed to the pathogens. The SARS-CoV-2 outbreak provides the unique  
12  
13 opportunity to study the age-dependent changes in immune responses in a controlled  
14  
15 manner.  
16  
17  
18  
19

20  
21 To understand the mechanisms behind the lower susceptibility of children compared to adults  
22  
23 to develop severe COVID-19 disease, we have established the observational study RECAST  
24  
25 (increased **RE**silience of **C**hildren compared to **A**dults in **SARS-CoV-2** infection) focusing on the  
26  
27 differences in the clinical presentation, lung function and the immune response to SARS-CoV-2  
28  
29 in children compared to adults.  
30  
31  
32  
33  
34  
35  
36  
37  
38  
39  
40  
41  
42  
43  
44  
45  
46  
47  
48  
49  
50  
51  
52  
53  
54  
55  
56  
57  
58  
59  
60

**Table 1.** Hypotheses to explain the resilience of children in SARS-CoV-2 infections

| Hypothesis                                                                                                                | Proposed explanation                                                                                | Scientific findings                                                                                                                                                                                                      |
|---------------------------------------------------------------------------------------------------------------------------|-----------------------------------------------------------------------------------------------------|--------------------------------------------------------------------------------------------------------------------------------------------------------------------------------------------------------------------------|
| <b>Reduced susceptibility for SARS-CoV-2 in children</b> <sup>18</sup>                                                    | Reduced virus entry via ACE-2 in children                                                           | SARS-Cov-2 uses ACE-2 in the upper and lower airways for host cell entry <sup>19</sup><br><br>The age-dependency of ACE-2 expression is controversially discussed <sup>20 21 22</sup>                                    |
|                                                                                                                           |                                                                                                     | Even though an increased expression of ACE-2 renders the individual more susceptible to viral infection, ACE-2 also initiates anti-inflammatory signaling and might contribute to a milder immune response <sup>23</sup> |
| <b>Age-dependent differential immune activation pattern</b>                                                               | Pre-activated immune components in children entail a milder immune response                         | In early childhood, infections of the upper respiratory tract are frequent. It has been proposed that previous infections with coronaviridae might contribute to a cross-reactive immunity <sup>24</sup>                 |
|                                                                                                                           |                                                                                                     | Pre-existing T cell reactivity to SARS-CoV-2 could affect the severity of COVID-19 <sup>10-13 25</sup>                                                                                                                   |
|                                                                                                                           |                                                                                                     | Cross-reactive antibodies entail a milder immune response to SARS-CoV-2 <sup>14</sup> . Of note, uninfected infants do not express cross-reactive antibodies <sup>26</sup>                                               |
|                                                                                                                           |                                                                                                     | The polyclonality and polyreactivity of IgM naturally present in children recognizes SARS-CoV-2 particles <sup>27</sup>                                                                                                  |
|                                                                                                                           | Children possess a stronger innate immunity than adults                                             | Children display a higher basal expression of pattern recognition receptors than adults and a stronger innate antiviral response <sup>28 29</sup>                                                                        |
|                                                                                                                           |                                                                                                     | The nasopharyngeal mucosa of children exhibits a stronger innate immunity and expresses more anti-viral cytokines than adults <sup>30</sup>                                                                              |
|                                                                                                                           | Children expose a different cytokine response upon SARS-CoV-2 infection than adults                 | In COVID-19, a cytokine storm leads to acute respiratory distress syndrome <sup>31 32</sup>                                                                                                                              |
|                                                                                                                           |                                                                                                     | Certain cytokine patterns correlate with COVID-19 severity <sup>33</sup>                                                                                                                                                 |
| Pro-inflammatory cytokine concentrations might be lower in children infected with SARS-CoV-2 than in adults <sup>34</sup> |                                                                                                     |                                                                                                                                                                                                                          |
| Co-infections lead to a milder immune reaction, e.g. because of virus competition or primed immune components             | In COVID-19, Co-infection with other pathogens is not rare, especially in children <sup>35-37</sup> |                                                                                                                                                                                                                          |

1  
2  
3 The complexity of immune responses requires a multi-level approach to display changes on  
4 various layers, including local immune cell composition, cytokine signaling and systemic  
5 response. It can be assumed that the combination of several mechanisms leads to the largely  
6 different phenotypes. At the same time, modern techniques allow to engage on an  
7 exploratory approach analyzing simultaneously the involvement of canonical and non-  
8 canonical immune response patterns. The multi-omics approach presented here allows deeply  
9 detailed characterization of the various layers of age dependent specific immune responses.  
10 Therefore, we believe that the presented study design will contribute to a further  
11 understanding even beyond COVID-19.  
12  
13  
14  
15  
16  
17  
18  
19  
20  
21  
22  
23  
24  
25

26 To meet these requirements adequately, we chose a multi-omics approach, including: i) single  
27 cell RNA sequencing of peripheral blood mononuclear cells (PBMC) and nasal epithelial cells,  
28 ii) mass spectrometry-based serum and plasma proteomics, which has been used to identify  
29 prognostic marker signatures for SARS-CoV-2 disease severity and devise risk-adapted  
30 treatment strategies <sup>38</sup>, iii) mass cytometry (cytometry by time-of-flight, CyTOF) of whole  
31 blood samples and nasal cells, that has been used to elucidate the role of T cell cytotoxicity in  
32 COVID <sup>25</sup> and to identify a dysregulation of the myeloid cell compartment as hallmark of severe  
33 COVID <sup>39</sup>, iv) highly differentiated nasal epithelial cultures and functional *in vitro* analyses, that  
34 have been used to display age-related differences in the nasal epithelium <sup>40</sup>, v) antibody  
35 testing and vi) sequencing of the viral genome. Obtained data are complemented with  
36 anamnestic and clinical information, lung function testing, including spirometry and multiple  
37 breath washout, which is a standardized method which allows to assess the ventilation  
38 homogeneity of the lungs already in preschool children as well as smell and taste. Longitudinal  
39 sampling allows monitoring of the immune response over the course of disease and beyond.  
40 Due to the maturation of the immune system during childhood, age-specific immune response  
41  
42  
43  
44  
45  
46  
47  
48  
49  
50  
51  
52  
53  
54  
55  
56  
57  
58  
59  
60

1  
2  
3 pattern against SARS-CoV-2 can be expected <sup>41 42</sup>. Thus participants of all age groups are  
4  
5 enrolled.  
6  
7

8 Participant recruitment began in October 2020 and is ongoing. Of particular interest is the  
9  
10 recruitment of children infected with various SARS-CoV-2 virus variants of concern.  
11  
12  
13

### 14 15 **Study objectives**

16  
17 This study aims to characterize and compare primary infections with SARS-CoV-2 in children  
18  
19 and adults, and to identify age-related determinants of disease course and prognosis. The  
20  
21 immune system is not only highly complex, but immune response patterns also vary  
22  
23 depending on individual predisposition; moreover, it also matures throughout the ageing of  
24  
25 an individual. Furthermore, of pivotal interest for the interpretation of these data is the  
26  
27 correlation between immune response pattern and clinical outcome.  
28  
29  
30  
31  
32  
33

## 34 **METHODS AND ANALYSIS**

### 35 36 37 **Study design**

38  
39 RECAST is a prospective observational cohort study at Charité – Universitätsmedizin Berlin in  
40  
41 Berlin, Germany. It is a sub-study of the Pa-COVID study of the Charité <sup>43</sup>, aiming to characterize  
42  
43 the disease course of patients suffering from COVID-19.  
44  
45  
46  
47

48 Data is collected longitudinally from patients with confirmed COVID-19 at three time points,  
49  
50 directly after the diagnosis and at follow-up visits after two weeks and four to six months, and  
51  
52 from healthy age-matched controls.  
53  
54

55  
56 Recruitment started in October 2020 and is planned to end in October 2023.  
57  
58  
59  
60

## Study population

### Inclusion criteria

Main inclusion criteria for the index person is a primary acute SARS-CoV-2 infection in a minor (< 18 years of age) with positive PCR or antigen testing (both will be confirmed by PCR testing).

### Exclusion criteria

Subjects with preexisting conditions affecting the immune response, such as diseases requiring chemotherapy or syndromes with immunodeficiency and subjects with concomitant medication that affects the immune response, such as systemic steroids, biologicals or investigational therapeutics targeting SARS-CoV-2, are excluded.

## Study procedures

### Patient identification and recruitment

A network of participating pediatric outpatient practices (n=20) has been established as sentinels to provide access to a pool of >25.000 pediatric patients. All children who tested positive for SARS-CoV2 by PCR or antigen testing as well as their household members are eligible for inclusion.

Healthy controls are recruited from clinical routine diagnostic settings if the diagnostic screening for SARS-CoV-2 was negative.

### Medical history, clinical assessment and functional testing

Assessed data include epidemiological and demographic parameters, medical history and potential risk factors, clinical course – including all diagnostic results of the present medical

1  
2  
3 attendance – and household and family constellation. A complete list of all items is attached  
4  
5 in the appendix (table E1).  
6  
7

8 Data are collected at first contact and during the follow-up visits. Symptoms of post- / long-  
9  
10 COVID <sup>44</sup> are documented and symptoms of myalgic encephalomyelitis / chronic fatigue  
11  
12 syndrome are assessed with the Canadian consensus criteria <sup>45 46</sup>, Chalder Fatigue Scale <sup>47</sup> and  
13  
14 PedsQL™ Multidimensional Fatigue Scale <sup>48-56</sup>. Loss of smell and taste are assessed with the  
15  
16 “U-Sniff” test, a 12-item odor identification, the “Sniffin' Sticks” olfactory threshold test and  
17  
18 taste samples for sweet, sour, salty, and bitter tastes in children aged six years or older <sup>57 58</sup>.  
19  
20 For adults, health status and quality of life are assessed with the St George's Respiratory  
21  
22 Questionnaire <sup>59</sup> and health status and mental health are evaluated with PHQ-9 <sup>60</sup> and PCL-5  
23  
24 <sup>61</sup> questionnaires. For children, quality of life is assessed using the KINDL questionnaire <sup>62</sup>.  
25  
26  
27  
28  
29

30  
31 Disease severity is classified according to clinical features using the criteria outlined in the  
32  
33 WHO COVID-19 clinical management guideline <sup>63</sup> as asymptomatic, mild, moderate, severe or  
34  
35 critical disease. Also, clinical progression is classified according to the WHO clinical progression  
36  
37 scale <sup>64</sup>. Applied classification scales are shown in tables 2 and 3.  
38  
39

40  
41 Functional testing, including lung function testing and multiple breath washout, will be  
42  
43 conducted at the follow-up visits after two weeks and four to six months.  
44  
45

#### 46 47 48 **Patient and public involvement** 49

50  
51 We will disseminate all findings in an appropriate and understandable manner to all  
52  
53 participants, including children. We welcome the collaboration of participants and public in  
54  
55 the interpretation and dissemination of all findings.  
56  
57  
58  
59  
60



**Table 2.** COVID disease severity.

Abbreviated criteria for COVID-19 disease severity according to WHO COVID-19 Clinical management guideline<sup>63</sup>.

| Patient State                         | Descriptor                                                                                                                   | Score |
|---------------------------------------|------------------------------------------------------------------------------------------------------------------------------|-------|
| <b>Uninfected</b>                     | Uninfected; no viral RNA detected                                                                                            | 0     |
| <b>Ambulatory: mild disease</b>       | Asymptomatic; viral RNA detected                                                                                             | 1     |
|                                       | Symptomatic; independent                                                                                                     | 2     |
|                                       | Symptomatic; assistance needed                                                                                               | 3     |
| <b>Hospitalized: moderate disease</b> | Hospitalized; no oxygen therapy                                                                                              | 4     |
|                                       | Hospitalized; oxygen by mask or nasal prongs                                                                                 | 5     |
| <b>Hospitalized: severe disease</b>   | Hospitalized; oxygen by NIV or high flow                                                                                     | 6     |
|                                       | Intubation and mechanical ventilation, pO <sub>2</sub> /pFiO <sub>2</sub> ≥ 150 or SpO <sub>2</sub> /FiO <sub>2</sub> ≥ 200  | 7     |
|                                       | Mechanical ventilation, pO <sub>2</sub> /pFiO <sub>2</sub> < 150 ( SpO <sub>2</sub> /FiO <sub>2</sub> < 200) or vasopressors | 8     |
|                                       | Mechanical ventilation, pO <sub>2</sub> /pFiO <sub>2</sub> < 150 and vasopressors, dialysis or ECMO                          | 9     |
| <b>Dead</b>                           | Dead                                                                                                                         | 10    |

**Table 3.** WHO clinical progression scale.Modified from WHO working group <sup>64</sup>.

| Disease severity        | Definition                                                                | Criteria                                                                                                                                                                                                                                                                                                                                                                                                                                     |
|-------------------------|---------------------------------------------------------------------------|----------------------------------------------------------------------------------------------------------------------------------------------------------------------------------------------------------------------------------------------------------------------------------------------------------------------------------------------------------------------------------------------------------------------------------------------|
| <b>Asymptomatic</b>     |                                                                           |                                                                                                                                                                                                                                                                                                                                                                                                                                              |
| <b>Mild</b>             |                                                                           | Symptomatic patients meeting the case definition for COVID-19 without evidence of viral pneumonia or hypoxia                                                                                                                                                                                                                                                                                                                                 |
| <b>Moderate</b>         | Pneumonia                                                                 | Clinical signs of (non-severe) pneumonia<br>Adolescent or adult: Fever, cough, dyspnoea, fast breathing<br>Child: Cough or difficulty breathing + fast breathing and/or chest indrawing<br>Diagnosis can be made on clinical grounds; chest imaging (radiograph, CT scan, ultrasound) may assist in diagnosis and identify or exclude pulmonary complications.                                                                               |
| <b>Severe</b>           | Severe pneumonia                                                          | Adolescent or adult: Plus one of the following: respiratory rate > 30 breaths/min; severe respiratory distress; or SpO <sub>2</sub> < 90% on room air<br>Child: Plus at least one of the following: Central cyanosis or SpO <sub>2</sub> < 90%; severe respiratory distress (e.g. fast breathing, grunting, very severe chest indrawing); general danger sign: inability to breastfeed or drink, lethargy or unconsciousness, or convulsions |
| <b>Critical disease</b> | Acute respiratory distress syndrome (ARDS)<br>OR<br>sepsis / septic shock | Oxygenation impairment, invasive ventilation or bilevel NIV / CPAP (≥ 5 cmH <sub>2</sub> O) required<br>OR<br>Infection and ≥ 2 Systemic Inflammatory Response Syndrome (SIRS) criteria                                                                                                                                                                                                                                                      |

### Sample collection

Samples will be collected from SARS-CoV-2 positive participants at each of three time points, directly after the diagnosis and at follow-up visits after two weeks and four to six months, and once from healthy age-matched controls.

Nasal and pharyngeal swab samples are collected for a SARS-CoV-2-PCR, single-cell RNA sequencing and establishment of air-liquid cell cultures. In addition, peripheral blood mononuclear cells (PBMCs) are collected for single-cell sequencing, whole blood for mass cytometry and plasma and serum for mass-spectrometry based proteomics, and SARS-CoV-2-specific antibody testing.

### Study database

For Pa-COVID-19 a study protocol was established that harmonizes clinical, molecular, and immunological phenotyping assessment in COVID-19 patients<sup>43</sup>. All data are added to an electronic case report form (eCRF; SecuTrial®). Participants included in RECAST are part of Pa-COVID-19. All participants are assigned a pseudonym consisting of a six- or seven-digit alphanumerical participant code. A separate log allows to match each participant and their code. Access to SecuTrial® requires username and password. All local data are secured by password.

### Sample description

Patients recruited in RECAST are grouped into six age categories (table 4). Due to the nature of observatory studies and the lack of pre-existing data, it is not possible to predict the extent of assumptive differences. Preliminary findings suggest that for most planned analyses a sample size of 15 is sufficient. The outlined sample sizes should suffice even for comparisons between children of different age groups.

**Table 4.** Age categories of the RECAST participants.

| Age group       |                                | Disease state | Number       | Timepoints         |
|-----------------|--------------------------------|---------------|--------------|--------------------|
| <b>Children</b> | Nursery (0-3 years)            | SARS-CoV2 -   | ≥ 30         | 1                  |
|                 |                                | SARS-CoV2 +   | ≥ 30         | 3 (day 0, 14, 180) |
|                 | Kindergarten (3-6 years)       | SARS-CoV2 -   | ≥ 30         | 1                  |
|                 |                                | SARS-CoV2 +   | ≥ 30         | 3 (day 0, 14, 180) |
|                 | Primary school (6-12 years)    | SARS-CoV2 -   | ≥ 30         | 1                  |
|                 |                                | SARS-CoV2 +   | ≥ 30         | 3 (day 0, 14, 180) |
|                 | Secondary school (13-18 years) | SARS-CoV2 -   | ≥ 30         | 1                  |
|                 |                                | SARS-CoV2 +   | ≥ 30         | 3 (day 0, 14, 180) |
| <b>Adults</b>   | <60 years                      | SARS-CoV2 -   | ≥ 30         | 1                  |
|                 |                                | SARS-CoV2 +   | ≥ 30         | 3 (day 0, 14, 180) |
|                 | >60 years                      | SARS-CoV2 -   | ≥ 30         | 1                  |
|                 |                                | SARS-CoV2 +   | ≥ 30         | 3 (day 0, 14, 180) |
| <b>TOTAL</b>    |                                |               | ≥ <b>360</b> | ≥ <b>720</b>       |

## PLANNED ANALYSES AND OUTCOMES OF INTEREST

We propose a multi-omics workup for all patients. A synopsis of the planned analyses is depicted in figure 1.

### **SARS-CoV-2-specific PCR and antibody testing**

All participants are screened for an active SARS-CoV-2 infection with RT-qPCRs targeting E and N genes<sup>65</sup>. Antibody testing is conducted for all serum and saliva samples with SARS-CoV-2-specific IgG- and IgA-ELISAs. In case of a reactive screening result, confirmatory testing with a recombinant Immunofluorescence assay (IFA) and a plaque reduction neutralization test<sup>66</sup> are conducted.

### **Nasal epithelial culture and functional *in-vitro* analyses**

Conditional reprogramming allows for the generation of long-term cultures of primary airway epithelial cells<sup>67-71</sup>. Without the need of genetic modification or clone selection, conditional reprogramming enables cell expansion, while re-differentiated cultures retain their organ-specific phenotype<sup>72</sup>. We establish highly differentiated polarized *in-vitro* air-liquid interface cultures that reproduce and allow for the analysis of physiological *in-vivo* conditions, such as heterogeneous cell composition with preserved lineage<sup>73</sup> as well as functional characteristics, including production of airway surface liquid<sup>74 75</sup> and mucociliary clearance<sup>76 77</sup>. For material collection, FLOQswabs (Copan, Italy) are used. Swabs are transferred into DMEM/F12 medium (Gibco, USA) and transported to our laboratory within two hours.

### **Mass cytometry of whole blood samples**

Whole blood is fixed with a proteomic stabilizer for preservation of surface and intracellular markers. Blood samples are stored at -80 °C until batch-based analysis. Thawed samples are stained in batches of nine patient and one anchor reference sample. Upon barcoding of

1  
2  
3 individual samples, they are pooled and stained with metal isotype conjugated anti-human  
4  
5 antibodies as described previously <sup>25 39</sup>. CyTOF technology allows for the detection of more  
6  
7 than 40 different barcodes simultaneously to identify cell populations in a high-throughput  
8  
9 setting [19, 75].  
10  
11

### 12 13 **Mass spectrometry-based serum and plasma proteomics**

14  
15  
16 A platform technology with semi-automated sample preparation to allow for ultra-high-  
17  
18 throughput liquid chromatography and mass-spectrometry based analyses of the proteome  
19  
20 has recently been established by members of our group <sup>78</sup>. In a directed approach, we  
21  
22 characterize the immune response-related serum and plasma proteome, with focus on the  
23  
24 acute phase response and the complement system. However, the plethora of proteome  
25  
26 signals that are generated per sample also allows for an undirected approach, delivering  
27  
28 predictive proteome signatures. To facilitate the computation of such extensive bulk data, a  
29  
30 deep neural network is employed <sup>79</sup>.  
31  
32  
33  
34  
35

### 36 37 **Single-cell sequencing of nasal epithelial cell samples and PBMCs**

38  
39 The nasopharynx is the entry point for an infection with SARS-CoV-2 <sup>80</sup> and as such of  
40  
41 distinguished concern in the exploration of the individual immune response pattern. Using  
42  
43 single-cell RNA sequencing (scRNAseq) of nasal and bronchial samples, we were previously  
44  
45 able to identify cell types and states that correlate with a severe disease course of COVID-19  
46  
47 <sup>81</sup>. Here, scRNAseq will be applied to define the composition and transcriptional activity of  
48  
49 immune and epithelial cells in the nasal environment of children and adults throughout the  
50  
51 various states of SARS-CoV-2 infection. Nasal swabs (FLOQswabs, Copan, Italy) are used for  
52  
53 sample collection. Following sample collection, swabs are directly transferred into cold  
54  
55 DMEM/F12 medium (Gibco, USA) and transported to our biosafety laboratory within one hour  
56  
57  
58  
59  
60

1  
2  
3 for further processing. Library preparation is performed according to manufacturer's protocol  
4  
5 (10x) and sequencing is performed using the Illumina NextSeq 6000 platform.  
6  
7

8  
9 In addition to the analysis of cells in the respiratory environment, PBMCs are isolated to study  
10  
11 the transcriptional activity of blood cell populations. Cell separation, library preparation and  
12  
13 comparative single cell transcriptome analyses are conducted according to the manufacturer's  
14  
15 protocol. Differential transcriptome profiles of immune cells of the blood will help us to  
16  
17 characterize the distinctive features of the systemic and localized immune response to SARS-  
18  
19 CoV-2 infections in children and adults.  
20  
21  
22

### 23 24 **Lung function testing and multiple breath washout**

25  
26  
27 SARS-CoV-2 infections cause severe lung damage in adults <sup>31 32</sup>. In a large review with 2135  
28  
29 children, 45% (951 children) were classified with a severity of moderate, severe or critical, all  
30  
31 with lung involvement per definition <sup>7</sup>. There is evidence that children with acute lung injury  
32  
33 experience the same lung pathologies as adults <sup>82</sup>. To assess the extent of transient and  
34  
35 permanent functional lung impairment, we investigate the lung function with spirometry and  
36  
37 multiple breath washout (MBW). MBW measures the lung ventilation homogeneity <sup>83 84</sup>. This  
38  
39 technique is already feasible without sedation in children from 2 years of age <sup>84</sup>. Spirometry  
40  
41 depends on the cooperation of the participant and may usually be conducted with children  
42  
43 aged six years or older. The technical MBW procedures are in accordance with the American  
44  
45 Thoracic Society Technical Statement <sup>85</sup>. Measurements are conducted by certified personnel  
46  
47 (ECFS-CTN certified) and for study measurements Exhalyzer D (Ecomedics, Dürnden,  
48  
49 Switzerland) will be used <sup>86</sup>. N<sub>2</sub> washout is used as tracer gas to determine the lung clearance  
50  
51 index as outcome measure. The lung clearance index (LCI) increases with lung ventilation  
52  
53 inhomogeneity.  
54  
55  
56  
57  
58  
59  
60

## Biobanking

Collected material is processed and stored at the central biobank of Charité (ZeBanC, <https://biobank.charite.de>). Material that is not immediately used is subjected to cryopreservation.

## ETHICS AND DISSEMINATION

All procedures in this study are in compliance with the principles of the 1964 Declaration of Helsinki and its amendments. We act in adherence to the principles of Good Clinical Practice (International Council for Harmonization, ICH 1996). The study was reviewed and approved by the Charité Ethics Committee (EA2/066/20). All participants enrolled give written informed consent in person, for participants minor of age the written informed consent of the legal guardian is also required.

Study procedures never interfere with the medical management of participants. Samples required for medical management always have priority. There is no direct benefit for patients participating in the study. Results from the study might improve our understanding of the disease and benefit the public health.

Data is monitored regularly. Informed consent forms are audited by a monitor appointed by the Charité Clinical Trial Management Unit. Data monitoring of collected data is performed in the course of the study.

As established for Pa-COVID<sup>43</sup>, we reiterate the fundamental principle in this study that all contributors and researchers who have access to samples commit to unrestricted data sharing. In accordance with FAIR data principles, all data collected shall be findable, accessible, interoperable, and re-usable<sup>87</sup>



1  
2  
3 Results originating from nasal epithelial culture and functional in-vitro analyses, mass  
4  
5 cytometry, mass spectrometry-based proteomics, single-cell sequencing and lung function  
6  
7 testing and multiple breath washout as well as clinical data will be will be disseminated  
8  
9 separately or in context in a variety of ways including abstracts, posters and presentations at  
10  
11 conferences and published manuscripts in peer-reviewed journals. As soon as all analyses are  
12  
13 completed, a comprehensive review will be published to put the findings in context of each  
14  
15 other.  
16  
17  
18  
19  
20  
21

## 22 **DISCUSSION**

23  
24 The SARS-CoV-2 pandemic has accelerated scientific research in the field of virology and  
25  
26 related immunobiology for nearly two years, yet many crucial questions remain unanswered.  
27  
28 Soon after the emergence of the virus it became apparent that, while children are just as likely  
29  
30 to be infected with SARS-CoV-2 as adults, they are less severely affected <sup>4-8 88</sup>. RECAST is an  
31  
32 observational study that aims to elucidate the differences between children and adults in  
33  
34 primary SARS-CoV-2 infections using a multi-omics approach. Revealing age-dependent  
35  
36 differences will help to develop better suited therapeutics and vaccination strategies beyond  
37  
38 SARS-CoV-2 infections.  
39  
40  
41  
42  
43  
44

45 Previous multi-omics approaches conducted with specimen from adult donors served to  
46  
47 elucidate the immune response in COVID <sup>81 89</sup>, to identify predictors of severe disease courses  
48  
49 <sup>90 91</sup> and to isolate possible targets for therapy <sup>81 91 92</sup>. Multi-omics-based studies focusing on  
50  
51 SARS-CoV-2 infections in children remain rare and are limited to small participant numbers  
52  
53 and only analyze a limited number of -omics dimensions: A study including 24 infected  
54  
55 children analyzed the single-cell transcriptional landscape in the upper airways <sup>28</sup>; with single-  
56  
57 cell multi-omic profiling of matched nasal, tracheal, bronchial and blood samples of 19  
58  
59  
60

1  
2  
3 infected children, a study characterized the immune landscape with focus on the upper  
4  
5 airways<sup>29</sup>; the plasma proteomic and metabolomic data of 18 infected children was analyzed  
6  
7  
8 in another study<sup>93</sup>; clinical characteristics and serum markers were analyzed in a larger group  
9  
10 that summarized children and young adults and T cell response in a pediatric subgroup of 11  
11  
12 participants was examined<sup>94</sup>; and a study with 24 infected children analyzed the T cell  
13  
14 response and specific antibody response<sup>95</sup>. Even though these studies contributed greatly to  
15  
16 a better understanding of age-related immune response patterns in COVID-19, there is still a  
17  
18 substantial demand for research. Especially studies analyzing the immune response over the  
19  
20 whole age and severity spectrum applying a multi-omics approach are needed. In addition,  
21  
22 mechanistic investigations, revealing the causal relationship between the different immune  
23  
24 defense layers, are missing. In RECAST, we will conduct a full multi-omics workup with at least  
25  
26 120 infected children, a larger number of participants than in previously published multi-omics  
27  
28 studies. Moreover, we will conduct follow-up visits for 6 months to profile the development  
29  
30 of age-specific immune response patterns over the course of time. Biobanking and long-term  
31  
32 storage of samples will be used to perform subsequent mechanistic studies upon first data  
33  
34 collection and hypotheses formulation. The recruitment of family members, both infected and  
35  
36 non-infected, allows to assess the effect of genetic relationships. The combination of high  
37  
38 resolution multi-dimensional immunologic methods with clinical endpoints in the RECAST  
39  
40 study will enable us to contribute to the understanding of the increased resilience of children  
41  
42 to SARS-CoV-2 infections.  
43  
44  
45  
46  
47  
48  
49  
50

51  
52 **Author Contributions:** BS, JR, MM, VC, MR and LS initiated the project and led the BMBF grant  
53  
54 proposal. All authors contributed to the design of the study. SS, JR, NZ, MK, TB, HSB, JM and ER are  
55  
56 collecting data biological material and are conducting functional testing. BS, MM, VC, MR, LS, IL, RE, JR  
57  
58 and VS lead their respective research field and supervise the conduction of experiments and the  
59  
60

1  
2  
3 interpretation of results. CDH, PMB and AB are conducting experiments. SS and JR produced the first  
4  
5 draft of the protocol. All authors provided critical review of the manuscript and have approved the  
6  
7 final version.  
8  
9

10 **Funding statement:** This work was supported by the German Federal Ministry of Education  
11  
12 and Research (grant number 01KI20337).  
13  
14

15 **Competing interests statement:** SS, NZ, MK, HSB, JM, ER, AB, PMB, CDH, VAS, RE, IL, MR, MM,  
16  
17 BS and JR have no conflict of interest related to this study. TB received payments for his  
18  
19 participation in an advisory board for vaccination against SARS-CoV-2. VC has a patent pending  
20  
21 in the diagnosis of SARS-CoV-2 infections. LS was involved in further studies relating to SARS-  
22  
23 CoV-2 that were funded by national grants.  
24  
25  
26  
27

28 **Acknowledgements:** We thank participating children and their families for their close  
29  
30 collaboration. We also thank all outpatient pediatricians who are involved in the recruitment.  
31  
32  
33  
34  
35  
36  
37  
38  
39  
40  
41  
42  
43  
44  
45  
46  
47  
48  
49  
50  
51  
52  
53  
54  
55  
56  
57  
58  
59  
60

## REFERENCES

1. Zhou P, Yang XL, Wang XG, et al. A pneumonia outbreak associated with a new coronavirus of probable bat origin. *Nature* 2020;579(7798):270-73. doi: 10.1038/s41586-020-2012-7 [published Online First: 2020/02/06]
2. Zhu N, Zhang D, Wang W, et al. A Novel Coronavirus from Patients with Pneumonia in China, 2019. *N Engl J Med* 2020;382(8):727-33. doi: 10.1056/NEJMoa2001017 [published Online First: 2020/01/25]
3. Organization WH. WHO COVID-19 Dashboard. 2020
4. Liguoro I, Pilotto C, Bonanni M, et al. SARS-COV-2 infection in children and newborns: a systematic review. *Eur J Pediatr* 2020;179(7):1029-46. doi: 10.1007/s00431-020-03684-7 [published Online First: 2020/05/20]
5. Castagnoli R, Votto M, Licari A, et al. Severe Acute Respiratory Syndrome Coronavirus 2 (SARS-CoV-2) Infection in Children and Adolescents: A Systematic Review. *JAMA Pediatr* 2020;174(9):882-89. doi: 10.1001/jamapediatrics.2020.1467 [published Online First: 2020/04/23]
6. Zhou F, Yu T, Du R, et al. Clinical course and risk factors for mortality of adult inpatients with COVID-19 in Wuhan, China: a retrospective cohort study. *Lancet* 2020;395(10229):1054-62. doi: 10.1016/S0140-6736(20)30566-3 [published Online First: 2020/03/15]
7. Dong Y, Mo X, Hu Y, et al. Epidemiology of COVID-19 Among Children in China. *Pediatrics* 2020;145(6):e20200702. doi: 10.1542/peds.2020-0702
8. Bhopal SS, Bagaria J, Olabi B, et al. Children and young people remain at low risk of COVID-19 mortality. *Lancet Child Adolesc Health* 2021;5(5):e12-e13. doi: 10.1016/S2352-4642(21)00066-3 [published Online First: 2021/03/14]
9. Dioguardi M, Cazzolla AP, Arena C, et al. Innate Immunity in Children and the Role of ACE2 Expression in SARS-CoV-2 Infection. *Pediatr Rep* 2021;13(3):363-82. doi: 10.3390/pediatric13030045 [published Online First: 2021/07/22]
10. Mateus J, Grifoni A, Tarke A, et al. Selective and cross-reactive SARS-CoV-2 T cell epitopes in unexposed humans. *Science* 2020;370(6512):89-94. doi: 10.1126/science.abd3871 [published Online First: 2020/08/06]
11. Shrock E, Fujimura E, Kula T, et al. Viral epitope profiling of COVID-19 patients reveals cross-reactivity and correlates of severity. *Science* 2020;370(6520) doi: 10.1126/science.abd4250 [published Online First: 2020/10/01]
12. Loyal L, Braun J, Henze L, et al. Cross-reactive CD4(+) T cells enhance SARS-CoV-2 immune responses upon infection and vaccination. *Science* 2021;374(6564):eabh1823. doi: 10.1126/science.abh1823 [published Online First: 2021/09/02]
13. Braun J, Loyal L, Frentsch M, et al. SARS-CoV-2-reactive T cells in healthy donors and patients with COVID-19. *Nature* 2020;587(7833):270-74. doi: 10.1038/s41586-020-2598-9 [published Online First: 2020/07/30]
14. Guo L, Wang Y, Kang L, et al. Cross-reactive antibody against human coronavirus OC43 spike protein correlates with disease severity in COVID-19 patients: a retrospective study. *Emerg Microbes Infect* 2021;10(1):664-76. doi: 10.1080/22221751.2021.1905488 [published Online First: 2021/03/19]
15. Coates BM, Staricha KL, Wiese KM, et al. Influenza A Virus Infection, Innate Immunity, and Childhood. *JAMA Pediatr* 2015;169(10):956-63. doi: 10.1001/jamapediatrics.2015.1387 [published Online First: 2015/08/04]
16. Prendergast AJ, Klenerman P, Goulder PJ. The impact of differential antiviral immunity in children and adults. *Nat Rev Immunol* 2012;12(9):636-48. doi: 10.1038/nri3277
17. Nam HH, Ison MG. Respiratory syncytial virus infection in adults. *BMJ* 2019;366:l5021. doi: 10.1136/bmj.l5021 [published Online First: 2019/09/10]
18. Viner RM, Mytton OT, Bonell C, et al. Susceptibility to SARS-CoV-2 Infection Among Children and Adolescents Compared With Adults: A Systematic Review and Meta-

- analysis. *JAMA Pediatr* 2021;175(2):143-56. doi: 10.1001/jamapediatrics.2020.4573 [published Online First: 2020/09/26]
19. Hoffmann M, Kleine-Weber H, Schroeder S, et al. SARS-CoV-2 Cell Entry Depends on ACE2 and TMPRSS2 and Is Blocked by a Clinically Proven Protease Inhibitor. *Cell* 2020;181(2):271-80.e8. doi: 10.1016/j.cell.2020.02.052
20. Zhang Z, Guo L, Huang L, et al. Distinct disease severity between children and older adults with COVID-19: Impacts of ACE2 expression, distribution, and lung progenitor cells. *Clin Infect Dis* 2021 doi: 10.1093/cid/ciaa1911 [published Online First: 2021/01/04]
21. Yonker LM, Neilan AM, Bartsch Y, et al. Pediatric Severe Acute Respiratory Syndrome Coronavirus 2 (SARS-CoV-2): Clinical Presentation, Infectivity, and Immune Responses. *J Pediatr* 2020;227:45-52 e5. doi: 10.1016/j.jpeds.2020.08.037 [published Online First: 2020/08/23]
22. Koch CM, Prigge AD, Anekalla KR, et al. Immune response to SARS-CoV-2 in the nasal mucosa in children and adults. *medRxiv* 2021 doi: 10.1101/2021.01.26.21250269 [published Online First: 2021/02/04]
23. Felsenstein S, Hedrich CM. SARS-CoV-2 infections in children and young people. *Clin Immunol* 2020;220:108588. doi: 10.1016/j.clim.2020.108588 [published Online First: 2020/09/10]
24. Lee CH, Pinho MP, Buckley PR, et al. Potential CD8+ T Cell Cross-Reactivity Against SARS-CoV-2 Conferred by Other Coronavirus Strains. *Front Immunol* 2020;11:579480. doi: 10.3389/fimmu.2020.579480 [published Online First: 2020/12/01]
25. Georg P, Astaburuaga-García R, Bonaguro L, et al. Complement activation induces excessive T cell cytotoxicity in severe COVID-19. *Cell* 2021 doi: <https://doi.org/10.1016/j.cell.2021.12.040>
26. Fraley E, LeMaster C, Banerjee D, et al. Cross-reactive antibody immunity against SARS-CoV-2 in children and adults. *Cell Mol Immunol* 2021;18(7):1826-28. doi: 10.1038/s41423-021-00700-0 [published Online First: 2021/06/02]
27. Massalska MA, Gober HJ. How Children Are Protected From COVID-19? A Historical, Clinical, and Pathophysiological Approach to Address COVID-19 Susceptibility. *Front Immunol* 2021;12:646894. doi: 10.3389/fimmu.2021.646894 [published Online First: 2021/06/29]
28. Loske J, Rohmel J, Lukassen S, et al. Pre-activated antiviral innate immunity in the upper airways controls early SARS-CoV-2 infection in children. *Nat Biotechnol* 2021 doi: 10.1038/s41587-021-01037-9 [published Online First: 2021/08/20]
29. Yoshida M, Worlock KB, Huang N, et al. Local and systemic responses to SARS-CoV-2 infection in children and adults. *Nature* 2022;602(7896):321-27. doi: 10.1038/s41586-021-04345-x [published Online First: 2021/12/23]
30. Pierce CA, Sy S, Galen B, et al. Natural mucosal barriers and COVID-19 in children. *JCI Insight* 2021;6(9) doi: 10.1172/jci.insight.148694 [published Online First: 2021/04/07]
31. Fajgenbaum DC, June CH. Cytokine Storm. *New England Journal of Medicine* 2020;383(23):2255-73. doi: 10.1056/NEJMra2026131
32. Kommos FKF, Schwab C, Tavernar L, et al. The Pathology of Severe COVID-19-Related Lung Damage. *Dtsch Arztebl Int* 2020;117(29-30):500-06. doi: 10.3238/arztebl.2020.0500 [published Online First: 2020/09/01]
33. Ozsurekci Y, Aykac K, Er AG, et al. Predictive value of cytokine/chemokine responses for the disease severity and management in children and adult cases with COVID-19. *J Med Virol* 2021;93(5):2828-37. doi: 10.1002/jmv.26683 [published Online First: 2020/11/24]
34. Jia R, Wang X, Liu P, et al. Mild Cytokine Elevation, Moderate CD4(+) T Cell Response and Abundant Antibody Production in Children with COVID-19. *Virol Sin* 2020;35(6):734-43. doi: 10.1007/s12250-020-00265-8 [published Online First: 2020/07/24]
35. Schneider JG, Relich RF, Datta D, et al. Identifying Risk Factors That Distinguish Symptomatic Severe Acute Respiratory Syndrome Coronavirus 2 Infection From



- 1  
2  
3 Common Upper Respiratory Infections in Children. *Cureus* 2021;13(2):e13266. doi:  
4 10.7759/cureus.13266 [published Online First: 2021/03/18]  
5 36. Wu Q, Xing Y, Shi L, et al. Coinfection and Other Clinical Characteristics of COVID-19 in  
6 Children. *Pediatrics* 2020;146(1) doi: 10.1542/peds.2020-0961 [published Online  
7 First: 2020/05/08]  
8 37. Li Y, Wang H, Wang F, et al. Co-infections of SARS-CoV-2 with multiple common  
9 respiratory pathogens in infected children: A retrospective study. *Medicine (Baltimore)*  
10 2021;100(11):e24315. doi: 10.1097/MD.00000000000024315 [published Online First:  
11 2021/03/18]  
12 38. Demichev V, Tober-Lau P, Lemke O, et al. A time-resolved proteomic and prognostic  
13 map of COVID-19. *Cell Syst* 2021 doi: 10.1016/j.cels.2021.05.005 [published Online  
14 First: 2021/06/18]  
15 39. Schulte-Schrepping J, Reusch N, Paclik D, et al. Severe COVID-19 Is Marked by a  
16 Dysregulated Myeloid Cell Compartment. *Cell* 2020;182(6):1419-40 e23. doi:  
17 10.1016/j.cell.2020.08.001 [published Online First: 2020/08/19]  
18 40. Anita Balázs PM-B, Michael Mülleler, Vadim Farztdinov, Lukasz Szyrwiell, Annalisa  
19 Addante, Aditi Kuppe, Tihomir Rubil, Marika Drescher, Kathrin Seidel, Sebastian  
20 Stricker, Roland Eils, Irina Lehmann, Birgit Sawitzki, Jobst Röhmel, Markus Ralser  
21 and Marcus Mall. Age-related differences in structure and function of nasal epithelial  
22 cultures from healthy children and elderly people. *Frontiers in Immunology* 2022  
23 41. Shaw AC, Goldstein DR, Montgomery RR. Age-dependent dysregulation of innate  
24 immunity. *Nat Rev Immunol* 2013;13(12):875-87. doi: 10.1038/nri3547 [published  
25 Online First: 2013/10/26]  
26 42. Simon AK, Hollander GA, McMichael A. Evolution of the immune system in humans from  
27 infancy to old age. *Proc Biol Sci* 2015;282(1821):20143085. doi:  
28 10.1098/rspb.2014.3085 [published Online First: 2015/12/25]  
29 43. Kurth F, Roennefarth M, Thibeault C, et al. Studying the pathophysiology of coronavirus  
30 disease 2019: a protocol for the Berlin prospective COVID-19 patient cohort (Pa-  
31 COVID-19). *Infection* 2020;48(4):619-26. doi: 10.1007/s15010-020-01464-x  
32 44. Koczulla AR, Ankermann T, Behrends U, et al. [S1 Guideline Post-COVID/Long-COVID].  
33 *Pneumologie* 2021 doi: 10.1055/a-1551-9734 [published Online First: 2021/09/03]  
34 45. Carruthers BM, Jain AK, De Meirleir KL, et al. Myalgic Encephalomyelitis/Chronic Fatigue  
35 Syndrome. *Journal of Chronic Fatigue Syndrome* 2003;11(1):7-115. doi:  
36 10.1300/j092v11n01\_02  
37 46. Kedor C, Freitag H, Meyer-Arndt L, et al. Chronic COVID-19 Syndrome and Chronic  
38 Fatigue Syndrome (ME/CFS) following the first pandemic wave in Germany – a first  
39 analysis of a prospective observational study: Cold Spring Harbor Laboratory, 2021.  
40 47. Chalder T, Berelowitz G, Pawlikowska T, et al. Development of a fatigue scale. *J*  
41 *Psychosom Res* 1993;37(2):147-53. doi: 10.1016/0022-3999(93)90081-p [published  
42 Online First: 1993/01/01]  
43 48. Varni JW, Burwinkle TM, Katz ER, et al. The PedsQL in pediatric cancer: reliability and  
44 validity of the Pediatric Quality of Life Inventory Generic Core Scales,  
45 Multidimensional Fatigue Scale, and Cancer Module. *Cancer* 2002;94(7):2090-106.  
46 doi: 10.1002/cncr.10428 [published Online First: 2002/04/05]  
47 49. Daniel LC, Brumley LD, Schwartz LA. Fatigue in adolescents with cancer compared to  
48 healthy adolescents. *Pediatr Blood Cancer* 2013;60(11):1902-7. doi:  
49 10.1002/psc.24706 [published Online First: 2013/07/31]  
50 50. Varni JW, Burwinkle TM, Szer IS. The PedsQL Multidimensional Fatigue Scale in  
51 pediatric rheumatology: reliability and validity. *J Rheumatol* 2004;31(12):2494-500.  
52 [published Online First: 2004/12/01]  
53 51. Varni JW, Limbers CA. The PedsQL Multidimensional Fatigue Scale in young adults:  
54 feasibility, reliability and validity in a University student population. *Qual Life Res*  
55 2008;17(1):105-14. doi: 10.1007/s11136-007-9282-5 [published Online First:  
56 2007/11/21]  
57  
58  
59  
60

52. Varni JW, Limbers CA, Bryant WP, et al. The PedsQL Multidimensional Fatigue Scale in type 1 diabetes: feasibility, reliability, and validity. *Pediatr Diabetes* 2009;10(5):321-8. doi: 10.1111/j.1399-5448.2008.00482.x [published Online First: 2008/12/11]
53. Varni JW, Limbers CA, Bryant WP, et al. The PedsQL multidimensional fatigue scale in pediatric obesity: feasibility, reliability and validity. *Int J Pediatr Obes* 2010;5(1):34-42. doi: 10.3109/17477160903111706 [published Online First: 2009/07/14]
54. Varni JW, Limbers CA, Bryant WP, et al. Assessment of Fatigue in Pediatric Patients With Short Stature Utilizing the PedsQL™ Multidimensional Fatigue Scale. *Children's Health Care* 2012;41(2):162-81. doi: 10.1080/02739615.2012.657068
55. Varni JW, Beaujean AA, Limbers CA. Factorial invariance of pediatric patient self-reported fatigue across age and gender: a multigroup confirmatory factor analysis approach utilizing the PedsQL Multidimensional Fatigue Scale. *Qual Life Res* 2013;22(9):2581-94. doi: 10.1007/s11136-013-0370-4 [published Online First: 2013/02/21]
56. Panepinto JA, Torres S, Bendo CB, et al. PedsQL Multidimensional Fatigue Scale in sickle cell disease: feasibility, reliability, and validity. *Pediatr Blood Cancer* 2014;61(1):171-7. doi: 10.1002/pbc.24776 [published Online First: 2013/09/17]
57. Schriever VA, Agosin E, Altundag A, et al. Development of an International Odor Identification Test for Children: The Universal Sniff Test. *J Pediatr* 2018;198:265-72 e3. doi: 10.1016/j.jpeds.2018.03.011 [published Online First: 2018/05/08]
58. Gellrich J, Sparing-Paschke LM, Thieme T, et al. Normative data for olfactory threshold and odor identification in children and adolescents. *Int J Pediatr Otorhinolaryngol* 2019;123:5-9. doi: 10.1016/j.ijporl.2019.01.009 [published Online First: 2019/05/06]
59. Jones PW, Quirk FH, Baveystock CM. The St George's Respiratory Questionnaire. *Respir Med* 1991;85 Suppl B:25-31; discussion 33-7. doi: 10.1016/s0954-6111(06)80166-6 [published Online First: 1991/09/01]
60. Kroenke K, Spitzer RL, Williams JB. The PHQ-9: validity of a brief depression severity measure. *J Gen Intern Med* 2001;16(9):606-13. doi: 10.1046/j.1525-1497.2001.016009606.x [published Online First: 2001/09/15]
61. Blevins CA, Weathers FW, Davis MT, et al. The Posttraumatic Stress Disorder Checklist for DSM-5 (PCL-5): Development and Initial Psychometric Evaluation. *J Trauma Stress* 2015;28(6):489-98. doi: 10.1002/jts.22059 [published Online First: 2015/11/26]
62. Ravens-Sieberer U, Bullinger M. Assessing health-related quality of life in chronically ill children with the German KINDL: first psychometric and content analytical results. *Qual Life Res* 1998;7(5):399-407. doi: 10.1023/a:1008853819715 [published Online First: 1998/08/06]
63. Organization WH. COVID-19 Clinical management: living guidance.
64. Characterisation WHOWGotC, Management of C-i. A minimal common outcome measure set for COVID-19 clinical research. *Lancet Infect Dis* 2020;20(8):e192-e97. doi: 10.1016/S1473-3099(20)30483-7 [published Online First: 2020/06/17]
65. Corman VM, Landt O, Kaiser M, et al. Detection of 2019 novel coronavirus (2019-nCoV) by real-time RT-PCR. *Euro Surveill* 2020;25(3) doi: 10.2807/1560-7917.ES.2020.25.3.2000045 [published Online First: 2020/01/30]
66. Wolfel R, Corman VM, Guggemos W, et al. Virological assessment of hospitalized patients with COVID-2019. *Nature* 2020;581(7809):465-69. doi: 10.1038/s41586-020-2196-x [published Online First: 2020/04/03]
67. Liu X, Krawczyk E, Supryniewicz FA, et al. Conditional reprogramming and long-term expansion of normal and tumor cells from human biospecimens. *Nat Protoc* 2017;12(2):439-51. doi: 10.1038/nprot.2016.174 [published Online First: 2017/01/27]
68. Liu X, Ory V, Chapman S, et al. ROCK inhibitor and feeder cells induce the conditional reprogramming of epithelial cells. *Am J Pathol* 2012;180(2):599-607. doi: 10.1016/j.ajpath.2011.10.036 [published Online First: 2011/12/23]
69. Chapman S, Liu X, Meyers C, et al. Human keratinocytes are efficiently immortalized by a Rho kinase inhibitor. *J Clin Invest* 2010;120(7):2619-26. doi: 10.1172/JCI42297 [published Online First: 2010/06/03]

- 1  
2  
3 70. Gentsch M, Boyles SE, Cheluvvaraju C, et al. Pharmacological Rescue of Conditionally  
4 Reprogrammed Cystic Fibrosis Bronchial Epithelial Cells. *Am J Respir Cell Mol Biol*  
5 2017;56(5):568-74. doi: 10.1165/rcmb.2016-0276MA [published Online First:  
6 2016/12/17]
- 7 71. Salomon JJ, Albrecht T, Graeber SY, et al. Chronic rhinosinusitis with nasal polyps is  
8 associated with impaired TMEM16A-mediated epithelial chloride secretion. *J Allergy*  
9 *Clin Immunol* 2021;147(6):2191-201 e2. doi: 10.1016/j.jaci.2021.02.008 [published  
10 Online First: 2021/02/21]
- 11 72. Schulze J, Mache C, Balazs A, et al. Analysis of Severe Acute Respiratory Syndrome 2  
12 Replication in Explant Cultures of the Human Upper Respiratory Tract Reveals Broad  
13 Tissue Tropism of Wild-Type and B.1.1.7 Variant Viruses. *J Infect Dis*  
14 2021;224(12):2020-24. doi: 10.1093/infdis/jiab523 [published Online First:  
15 2021/10/16]
- 16 73. Martinovich KM, Iosifidis T, Buckley AG, et al. Conditionally reprogrammed primary  
17 airway epithelial cells maintain morphology, lineage and disease specific functional  
18 characteristics. *Sci Rep* 2017;7(1):17971. doi: 10.1038/s41598-017-17952-4  
19 [published Online First: 2017/12/23]
- 20 74. Bove PF, Dang H, Cheluvvaraju C, et al. Breaking the in vitro alveolar type II cell  
21 proliferation barrier while retaining ion transport properties. *Am J Respir Cell Mol Biol*  
22 2014;50(4):767-76. doi: 10.1165/rcmb.2013-0071OC [published Online First:  
23 2013/11/07]
- 24 75. Mall MA, Button B, Johannesson B, et al. Airway surface liquid volume regulation  
25 determines different airway phenotypes in liddle compared with betaENaC-  
26 overexpressing mice. *J Biol Chem* 2010;285(35):26945-55. doi:  
27 10.1074/jbc.M110.151803 [published Online First: 2010/06/23]
- 28 76. Liu X, Wu Y, Rong L. Conditionally Reprogrammed Human Normal Airway Epithelial  
29 Cells at ALI: A Physiological Model for Emerging Viruses. *Viral Sin* 2020;35(3):280-  
30 89. doi: 10.1007/s12250-020-00244-z [published Online First: 2020/06/20]
- 31 77. Duerr J, Leitz DHW, Szczygiel M, et al. Conditional deletion of Nedd4-2 in lung epithelial  
32 cells causes progressive pulmonary fibrosis in adult mice. *Nat Commun*  
33 2020;11(1):2012. doi: 10.1038/s41467-020-15743-6 [published Online First:  
34 2020/04/26]
- 35 78. Messner CB, Demichev V, Wendisch D, et al. Ultra-High-Throughput Clinical Proteomics  
36 Reveals Classifiers of COVID-19 Infection. *Cell Syst* 2020;11(1):11-24 e4. doi:  
37 10.1016/j.cels.2020.05.012 [published Online First: 2020/07/04]
- 38 79. Demichev V, Messner CB, Vernardis SI, et al. DIA-NN: neural networks and interference  
39 correction enable deep proteome coverage in high throughput. *Nat Methods*  
40 2020;17(1):41-44. doi: 10.1038/s41592-019-0638-x [published Online First:  
41 2019/11/27]
- 42 80. Sungnak W, Huang N, Becavin C, et al. SARS-CoV-2 entry factors are highly expressed  
43 in nasal epithelial cells together with innate immune genes. *Nat Med* 2020;26(5):681-  
44 87. doi: 10.1038/s41591-020-0868-6 [published Online First: 2020/04/25]
- 45 81. Chua RL, Lukassen S, Trump S, et al. COVID-19 severity correlates with airway  
46 epithelium-immune cell interactions identified by single-cell analysis. *Nat Biotechnol*  
47 2020;38(8):970-79. doi: 10.1038/s41587-020-0602-4 [published Online First:  
48 2020/06/28]
- 49 82. Mitchell WB. Thromboinflammation in COVID-19 acute lung injury. *Paediatr Respir Rev*  
50 2020;35:20-24. doi: 10.1016/j.prrv.2020.06.004 [published Online First: 2020/07/13]
- 51 83. Stahl M, Joachim C, Blessing K, et al. Multiple breath washout is feasible in the clinical  
52 setting and detects abnormal lung function in infants and young children with cystic  
53 fibrosis. *Respiration* 2014;87(5):357-63. doi: 10.1159/000357075 [published Online  
54 First: 2014/01/18]
- 55 84. Stahl M, Joachim C, Kirsch I, et al. Multicentre feasibility of multiple-breath washout in  
56 preschool children with cystic fibrosis and other lung diseases. *ERJ Open Res*  
57 2020;6(4) doi: 10.1183/23120541.00408-2020 [published Online First: 2020/12/03]
- 58  
59  
60



- 1
- 2
- 3
- 4 85. Beydon N, Davis SD, Lombardi E, et al. An official American Thoracic Society/European
- 5 Respiratory Society statement: pulmonary function testing in preschool children. *Am J*
- 6 *Respir Crit Care Med* 2007;175(12):1304-45. doi: 10.1164/rccm.200605-642ST
- 7 [published Online First: 2007/06/05]
- 8 86. Saunders C, Jensen R, Robinson PD, et al. Integrating the multiple breath washout test
- 9 into international multicentre trials. *J Cyst Fibros* 2020;19(4):602-07. doi:
- 10 10.1016/j.jcf.2019.11.006 [published Online First: 2019/11/28]
- 11 87. Wilkinson MD, Dumontier M, Aalbersberg IJ, et al. The FAIR Guiding Principles for
- 12 scientific data management and stewardship. *Sci Data* 2016;3:160018. doi:
- 13 10.1038/sdata.2016.18 [published Online First: 2016/03/16]
- 14 88. Zimmermann P, Curtis N. Coronavirus Infections in Children Including COVID-19: An
- 15 Overview of the Epidemiology, Clinical Features, Diagnosis, Treatment and
- 16 Prevention Options in Children. *Pediatr Infect Dis J* 2020;39(5):355-68. doi:
- 17 10.1097/INF.0000000000002660 [published Online First: 2020/04/21]
- 18 89. Stephenson E, Reynolds G, Botting RA, et al. Single-cell multi-omics analysis of the
- 19 immune response in COVID-19. *Nat Med* 2021;27(5):904-16. doi: 10.1038/s41591-
- 20 021-01329-2 [published Online First: 2021/04/22]
- 21 90. Bernardes JP, Mishra N, Tran F, et al. Longitudinal Multi-omics Analyses Identify
- 22 Responses of Megakaryocytes, Erythroid Cells, and Plasmablasts as Hallmarks of
- 23 Severe COVID-19. *Immunity* 2020;53(6):1296-314 e9. doi:
- 24 10.1016/j.immuni.2020.11.017 [published Online First: 2020/12/10]
- 25 91. Trump S, Lukassen S, Anker MS, et al. Hypertension delays viral clearance and
- 26 exacerbates airway hyperinflammation in patients with COVID-19. *Nat Biotechnol*
- 27 2021;39(6):705-16. doi: 10.1038/s41587-020-00796-1 [published Online First:
- 28 2020/12/29]
- 29 92. Stukalov A, Girault V, Grass V, et al. Multilevel proteomics reveals host perturbations by
- 30 SARS-CoV-2 and SARS-CoV. *Nature* 2021;594(7862):246-52. doi: 10.1038/s41586-
- 31 021-03493-4 [published Online First: 2021/04/13]
- 32 93. Wang C, Li X, Ning W, et al. Multi-omic profiling of plasma reveals molecular alterations
- 33 in children with COVID-19. *Theranostics* 2021;11(16):8008-26. doi:
- 34 10.7150/thno.61832 [published Online First: 2021/08/03]
- 35 94. Pierce CA, Preston-Hurlburt P, Dai Y, et al. Immune responses to SARS-CoV-2 infection
- 36 in hospitalized pediatric and adult patients. *Sci Transl Med* 2020;12(564) doi:
- 37 10.1126/scitranslmed.abd5487 [published Online First: 2020/09/23]
- 38 95. Cohen CA, Li APY, Hachim A, et al. SARS-CoV-2 specific T cell responses are lower in
- 39 children and increase with age and time after infection. *Nat Commun*
- 40 2021;12(1):4678. doi: 10.1038/s41467-021-24938-4 [published Online First:
- 41 2021/07/31]
- 42
- 43
- 44
- 45
- 46
- 47

### 48 **Figure 1. Performed analyses in the RECAST study**

49 The RECAST study consist of 8 elements, including the anamnesis and clinical data, a  
50 comprehensive multi-omics workup of the immune landscape of the blood and the upper  
51 airways and lung function testing.  
52  
53  
54  
55  
56  
57  
58  
59  
60



Figure 1. Performed analyses in the RECAST study

The RECAST study consist of 8 elements, including the anamnesis and clinical data, a comprehensive multi-omics workup of the immune landscape of the blood and the upper airways and lung function testing.

413x226mm (96 x 96 DPI)

1  
2  
3 **Appendix, table E1. Assessed data.**  
4  
5

| Assessed data                                                                                                                                                                                                               | Item list                                                                                                                                                                                                                                                                                                                                                                                                                                                                                                                                                                                                                                                                                                            |
|-----------------------------------------------------------------------------------------------------------------------------------------------------------------------------------------------------------------------------|----------------------------------------------------------------------------------------------------------------------------------------------------------------------------------------------------------------------------------------------------------------------------------------------------------------------------------------------------------------------------------------------------------------------------------------------------------------------------------------------------------------------------------------------------------------------------------------------------------------------------------------------------------------------------------------------------------------------|
| Family constellation                                                                                                                                                                                                        |                                                                                                                                                                                                                                                                                                                                                                                                                                                                                                                                                                                                                                                                                                                      |
| Biometric information, including sex at birth, body height, body weight, ethnicity, number of children and grand-children and profession                                                                                    |                                                                                                                                                                                                                                                                                                                                                                                                                                                                                                                                                                                                                                                                                                                      |
| Tests for SARS-CoV-2 in the last 4 weeks, including type, date and result                                                                                                                                                   |                                                                                                                                                                                                                                                                                                                                                                                                                                                                                                                                                                                                                                                                                                                      |
| Vaccination against SARS-CoV-2, including manufacturer, date(s) and symptoms after vaccination                                                                                                                              |                                                                                                                                                                                                                                                                                                                                                                                                                                                                                                                                                                                                                                                                                                                      |
| Temporal course of infection in the family                                                                                                                                                                                  |                                                                                                                                                                                                                                                                                                                                                                                                                                                                                                                                                                                                                                                                                                                      |
| Index case and assumed point of infection                                                                                                                                                                                   |                                                                                                                                                                                                                                                                                                                                                                                                                                                                                                                                                                                                                                                                                                                      |
| Information about household, including number of household members, pet animals and information about smoking (including smoked substances)                                                                                 |                                                                                                                                                                                                                                                                                                                                                                                                                                                                                                                                                                                                                                                                                                                      |
| Paediatric anamnesis, including biological parents and legal parents, gestational week at birth, problems during pregnancy, birth and perinatal period, childcare or daycare or school or training, previous RSV infections |                                                                                                                                                                                                                                                                                                                                                                                                                                                                                                                                                                                                                                                                                                                      |
| Medical conditions and therapy, including smoking (including substance and length), atopic disposition, allergies, asthma and previous hospitalizations                                                                     |                                                                                                                                                                                                                                                                                                                                                                                                                                                                                                                                                                                                                                                                                                                      |
| Symptoms (including duration) as listed and symptom severity according to WHO scales                                                                                                                                        | Fever or elevated temperature, exhaustion and fatigue, loss of appetite, dizziness, diarrhea, nausea, vomiting, impaired sense of taste or smell, rhinorrhea, congested nose, sneezing, unproductive cough, productive cough, shortness of breath, headache, abdominal pain, sore throat, muscle ache, chest pain, ear pain, joint pain, conjunctivitis, lymphadenitis, skin efflorescence, shivering, paresis, impaired consciousness                                                                                                                                                                                                                                                                               |
| Hygiene measures to prevent spreading of disease                                                                                                                                                                            |                                                                                                                                                                                                                                                                                                                                                                                                                                                                                                                                                                                                                                                                                                                      |
| Ability to smell, including parosmia                                                                                                                                                                                        |                                                                                                                                                                                                                                                                                                                                                                                                                                                                                                                                                                                                                                                                                                                      |
| Consequences of SARS-CoV-2 infection, including hospitalization, concomitant disease(s) and treatment                                                                                                                       |                                                                                                                                                                                                                                                                                                                                                                                                                                                                                                                                                                                                                                                                                                                      |
| Symptoms of Post-COVID or fatigue as listed, including their duration, whether dependent in occurrence or intensity on physical or mental stress or posture                                                                 | Pain, nausea, vomiting, lymphadenitis, loss of appetite, abdominal complaint(s), loss of smell or taste, palpitation, shortness of breath, coughing, fever, skin efflorescence, conjunctivitis, hair loss, reddening or swelling of hand or feet, reddening or swelling of tongue, lips or cheeks, exhaustion or fatigue, reduced physical and exercise capacity, sleep ineffectivity, disturbed sleeping rhythm, disturbed sleep duration, mood disturbance, cognitive impairment, behavioral changes, sadness or depression, restlessness or excitement, orthostatic dysregulation, increased sensibility to triggers, such as light, noise, smell, touch or others, impaired adaptability to cold, heat or others |

STROBE Statement—checklist of items that should be included in reports of observational studies

|                           | Item No. | Recommendation                                                                                                                                                                                                                                                                                                                                                                                                                                                         | Page No. | Relevant text from manuscript |
|---------------------------|----------|------------------------------------------------------------------------------------------------------------------------------------------------------------------------------------------------------------------------------------------------------------------------------------------------------------------------------------------------------------------------------------------------------------------------------------------------------------------------|----------|-------------------------------|
| <b>Title and abstract</b> | 1        | (a) Indicate the study’s design with a commonly used term in the title or the abstract                                                                                                                                                                                                                                                                                                                                                                                 | 1        | observational study           |
|                           |          | (b) Provide in the abstract an informative and balanced summary of what was done and what was found                                                                                                                                                                                                                                                                                                                                                                    | 4        |                               |
| <b>Introduction</b>       |          |                                                                                                                                                                                                                                                                                                                                                                                                                                                                        |          |                               |
| Background/rationale      | 2        | Explain the scientific background and rationale for the investigation being reported                                                                                                                                                                                                                                                                                                                                                                                   | 5, 6     |                               |
| Objectives                | 3        | State specific objectives, including any prespecified hypotheses                                                                                                                                                                                                                                                                                                                                                                                                       | 7        |                               |
| <b>Methods</b>            |          |                                                                                                                                                                                                                                                                                                                                                                                                                                                                        |          |                               |
| Study design              | 4        | Present key elements of study design early in the paper                                                                                                                                                                                                                                                                                                                                                                                                                | 8        |                               |
| Setting                   | 5        | Describe the setting, locations, and relevant dates, including periods of recruitment, exposure, follow-up, and data collection                                                                                                                                                                                                                                                                                                                                        | 8 - 10   |                               |
| Participants              | 6        | (a) <i>Cohort study</i> —Give the eligibility criteria, and the sources and methods of selection of participants. Describe methods of follow-up<br><i>Case-control study</i> —Give the eligibility criteria, and the sources and methods of case ascertainment and control selection. Give the rationale for the choice of cases and controls<br><i>Cross-sectional study</i> —Give the eligibility criteria, and the sources and methods of selection of participants | 9 - 10   |                               |
|                           |          | (b) <i>Cohort study</i> —For matched studies, give matching criteria and number of exposed and unexposed<br><i>Case-control study</i> —For matched studies, give matching criteria and the number of controls per case                                                                                                                                                                                                                                                 |          |                               |

|                              |    |                                                                                                                                                                                                                                                                                                                                                                                                                                                                                                                                                                                               |                                                             |
|------------------------------|----|-----------------------------------------------------------------------------------------------------------------------------------------------------------------------------------------------------------------------------------------------------------------------------------------------------------------------------------------------------------------------------------------------------------------------------------------------------------------------------------------------------------------------------------------------------------------------------------------------|-------------------------------------------------------------|
| Variables                    | 7  | Clearly define all outcomes, exposures, predictors, potential confounders, and effect modifiers. Give diagnostic criteria, if applicable                                                                                                                                                                                                                                                                                                                                                                                                                                                      | 10 - 13                                                     |
| Data sources/<br>measurement | 8* | For each variable of interest, give sources of data and details of methods of assessment (measurement). Describe comparability of assessment methods if there is more than one group                                                                                                                                                                                                                                                                                                                                                                                                          | 10 - 13                                                     |
| Bias                         | 9  | Describe any efforts to address potential sources of bias                                                                                                                                                                                                                                                                                                                                                                                                                                                                                                                                     | NA<br>study not<br>terminated, no<br>data interpretation    |
| Study size                   | 10 | Explain how the study size was arrived at                                                                                                                                                                                                                                                                                                                                                                                                                                                                                                                                                     | NA<br>study not<br>terminated,<br>no data<br>interpretation |
| Quantitative variables       | 11 | Explain how quantitative variables were handled in the analyses. If applicable, describe which groupings were chosen and why                                                                                                                                                                                                                                                                                                                                                                                                                                                                  | NA<br>study not<br>terminated,<br>no data<br>interpretation |
| Statistical methods          | 12 | <p>(a) Describe all statistical methods, including those used to control for confounding</p> <p>(b) Describe any methods used to examine subgroups and interactions</p> <p>(c) Explain how missing data were addressed</p> <p>(d) <i>Cohort study</i>—If applicable, explain how loss to follow-up was addressed</p> <p><i>Case-control study</i>—If applicable, explain how matching of cases and controls was addressed</p> <p><i>Cross-sectional study</i>—If applicable, describe analytical methods taking account of sampling strategy</p> <p>(e) Describe any sensitivity analyses</p> | NA<br>study not<br>terminated,<br>no data<br>interpretation |

1  
2  
3  
4  
5  
6  
7  
8  
9  
10  
11  
12  
13  
14  
15  
16  
17  
18  
19  
20  
21  
22  
23  
24  
25  
26  
27  
28  
29  
30  
31  
32  
33  
34  
35  
36  
37  
38  
39  
40  
41  
42  
43  
44  
45  
46

|                   |     |                                                                                                                                                                                                                                                                                                                                                                                                               |                                                       |
|-------------------|-----|---------------------------------------------------------------------------------------------------------------------------------------------------------------------------------------------------------------------------------------------------------------------------------------------------------------------------------------------------------------------------------------------------------------|-------------------------------------------------------|
| Participants      | 13* | (a) Report numbers of individuals at each stage of study—eg numbers potentially eligible, examined for eligibility, confirmed eligible, included in the study, completing follow-up, and analysed<br>(b) Give reasons for non-participation at each stage<br>(c) Consider use of a flow diagram                                                                                                               | NA<br>study not terminated,<br>no data interpretation |
| Descriptive data  | 14* | (a) Give characteristics of study participants (eg demographic, clinical, social) and information on exposures and potential confounders<br>(b) Indicate number of participants with missing data for each variable of interest<br>(c) <i>Cohort study</i> —Summarise follow-up time (eg, average and total amount)                                                                                           |                                                       |
| Outcome data      | 15* | <i>Cohort study</i> —Report numbers of outcome events or summary measures over time<br><i>Case-control study</i> —Report numbers in each exposure category, or summary measures of exposure<br><i>Cross-sectional study</i> —Report numbers of outcome events or summary measures                                                                                                                             |                                                       |
| Main results      | 16  | (a) Give unadjusted estimates and, if applicable, confounder-adjusted estimates and their precision (eg, 95% confidence interval). Make clear which confounders were adjusted for and why they were included<br>(b) Report category boundaries when continuous variables were categorized<br>(c) If relevant, consider translating estimates of relative risk into absolute risk for a meaningful time period |                                                       |
| Other analyses    | 17  | Report other analyses done—eg analyses of subgroups and interactions, and sensitivity analyses                                                                                                                                                                                                                                                                                                                |                                                       |
| <b>Discussion</b> |     |                                                                                                                                                                                                                                                                                                                                                                                                               |                                                       |
| Key results       | 18  | Summarise key results with reference to study objectives                                                                                                                                                                                                                                                                                                                                                      | 14                                                    |
| Limitations       | 19  | Discuss limitations of the study, taking into account sources of potential bias or imprecision. Discuss both direction and magnitude of any potential bias                                                                                                                                                                                                                                                    | 14 - 15                                               |
| Interpretation    | 20  | Give a cautious overall interpretation of results considering objectives, limitations, multiplicity of analyses, results from similar studies, and other relevant evidence                                                                                                                                                                                                                                    | 15                                                    |
| Generalisability  | 21  | Discuss the generalisability (external validity) of the study results                                                                                                                                                                                                                                                                                                                                         | NA<br>study not terminated,<br>no data interpretation |

---

**Other information**

---

|         |    |                                                                                                                                                               |    |
|---------|----|---------------------------------------------------------------------------------------------------------------------------------------------------------------|----|
| Funding | 22 | Give the source of funding and the role of the funders for the present study and, if applicable, for the original study on which the present article is based | 15 |
|---------|----|---------------------------------------------------------------------------------------------------------------------------------------------------------------|----|

---

\*Give information separately for cases and controls in case-control studies and, if applicable, for exposed and unexposed groups in cohort and cross-sectional studies.

**Note:** An Explanation and Elaboration article discusses each checklist item and gives methodological background and published examples of transparent reporting. The STROBE checklist is best used in conjunction with this article (freely available on the Web sites of PLoS Medicine at <http://www.plosmedicine.org/>, Annals of Internal Medicine at <http://www.annals.org/>, and Epidemiology at <http://www.epidem.com/>). Information on the STROBE Initiative is available at [www.strobe-statement.org](http://www.strobe-statement.org).

# BMJ Open

## RECAST: An observational study for the understanding of the increased REsilience of Children compared to Adults in SARS-CoV-2 infection

|                                 |                                                                                                                                                                                                                                                                                                                                                                                                                                                                                                                                                                                                                                                                                                                                                                                                                                                                                                                                                                                                                                                                                                                                                                                                                                                                                                                                                                                                                                                                                                                                                                                                                                                                                                                                                                                                                                                                                                                                                                                                                                                                                                                                                                                                                        |
|---------------------------------|------------------------------------------------------------------------------------------------------------------------------------------------------------------------------------------------------------------------------------------------------------------------------------------------------------------------------------------------------------------------------------------------------------------------------------------------------------------------------------------------------------------------------------------------------------------------------------------------------------------------------------------------------------------------------------------------------------------------------------------------------------------------------------------------------------------------------------------------------------------------------------------------------------------------------------------------------------------------------------------------------------------------------------------------------------------------------------------------------------------------------------------------------------------------------------------------------------------------------------------------------------------------------------------------------------------------------------------------------------------------------------------------------------------------------------------------------------------------------------------------------------------------------------------------------------------------------------------------------------------------------------------------------------------------------------------------------------------------------------------------------------------------------------------------------------------------------------------------------------------------------------------------------------------------------------------------------------------------------------------------------------------------------------------------------------------------------------------------------------------------------------------------------------------------------------------------------------------------|
| Journal:                        | <i>BMJ Open</i>                                                                                                                                                                                                                                                                                                                                                                                                                                                                                                                                                                                                                                                                                                                                                                                                                                                                                                                                                                                                                                                                                                                                                                                                                                                                                                                                                                                                                                                                                                                                                                                                                                                                                                                                                                                                                                                                                                                                                                                                                                                                                                                                                                                                        |
| Manuscript ID                   | bmjopen-2022-065221.R2                                                                                                                                                                                                                                                                                                                                                                                                                                                                                                                                                                                                                                                                                                                                                                                                                                                                                                                                                                                                                                                                                                                                                                                                                                                                                                                                                                                                                                                                                                                                                                                                                                                                                                                                                                                                                                                                                                                                                                                                                                                                                                                                                                                                 |
| Article Type:                   | Protocol                                                                                                                                                                                                                                                                                                                                                                                                                                                                                                                                                                                                                                                                                                                                                                                                                                                                                                                                                                                                                                                                                                                                                                                                                                                                                                                                                                                                                                                                                                                                                                                                                                                                                                                                                                                                                                                                                                                                                                                                                                                                                                                                                                                                               |
| Date Submitted by the Author:   | 27-Mar-2023                                                                                                                                                                                                                                                                                                                                                                                                                                                                                                                                                                                                                                                                                                                                                                                                                                                                                                                                                                                                                                                                                                                                                                                                                                                                                                                                                                                                                                                                                                                                                                                                                                                                                                                                                                                                                                                                                                                                                                                                                                                                                                                                                                                                            |
| Complete List of Authors:       | <p>Stricker, Sebastian; Charité Universitätsmedizin Berlin, Department of Pediatric Respiratory Medicine, Immunology and Critical Care Medicine<br/> Ziegahn, Niklas; Charité Universitätsmedizin Berlin<br/> Karsten, Martin; Karsten, Rugo, Wagner, paediatric practice<br/> Boeckel, Thomas; Boeckel, Haverkaemper, paediatric practice and practice for paediatric cardiology<br/> Stich-Boeckel, Heike; Stich-Boeckel, paediatric practice<br/> Maske, Jakob; Maske, Pankok, paediatric practice<br/> Rugo, Evelyn; Karsten, Rugo, Wagner, paediatric practice<br/> Balazs, Anita; Charité Universitätsmedizin Berlin, Department of Paediatric Respiratory Medicine, Immunology and Critical Care Medicine<br/> Millar Büchner, Pamela ; Charité Universitätsmedizin Berlin, Department of Paediatric Respiratory Medicine, Immunology and Critical Care Medicine<br/> Dang-Heine, Chantip; Berlin Institute of Health at Charité, Clinical Study Center (CSC)<br/> Schriever, Valentin; Charité Universitätsmedizin Berlin, Department of Paediatric Neurology; Charité Universitätsmedizin Berlin, Center for Chronically Sick Children (Sozialpädiatrisches Zentrum, SPZ)<br/> Eils, Roland; Berlin Institute of Health at Charité, Center for Digital Health; Berlin Institute of Health at Charité, Molecular Epidemiology Unit<br/> Lehmann, Irina; Berlin Institute of Health at Charité, Center for Digital Health; German Center for Lung Research<br/> Sander, Leif Erik; Charité Universitätsmedizin Berlin, Department of Infectious Diseases and Respiratory Medicine<br/> Ralsler, Markus; Charité Universitätsmedizin Berlin, Department of Biochemistry; The Francis Crick Institute, Molecular Biology of Metabolism Laboratory<br/> Corman, Victor; Charité Universitätsmedizin Berlin, Institute of Virology<br/> Mall, Marcus; Charité Universitätsmedizin Berlin; German Center for Lung Research<br/> Sawitzki, Birgit; Charité Universitätsmedizin Berlin; Berlin Institute of Health at Charité<br/> Roehmel, Jobst; Charité Universitätsmedizin Berlin, Department of Paediatric Respiratory Medicine, Immunology and Critical Care Medicine; Berlin Institute of Health at Charite</p> |
| <b>Primary Subject Heading</b>: | Paediatrics                                                                                                                                                                                                                                                                                                                                                                                                                                                                                                                                                                                                                                                                                                                                                                                                                                                                                                                                                                                                                                                                                                                                                                                                                                                                                                                                                                                                                                                                                                                                                                                                                                                                                                                                                                                                                                                                                                                                                                                                                                                                                                                                                                                                            |



1  
2  
3  
4  
5  
6  
7  
8  
9  
10  
11  
12  
13  
14  
15  
16  
17  
18  
19  
20  
21  
22  
23  
24  
25  
26  
27  
28  
29  
30  
31  
32  
33  
34  
35  
36  
37  
38  
39  
40  
41  
42  
43  
44  
45  
46  
47  
48  
49  
50  
51  
52  
53  
54  
55  
56  
57  
58  
59  
60

|                            |                                                     |
|----------------------------|-----------------------------------------------------|
| Secondary Subject Heading: | Infectious diseases, Immunology (including allergy) |
| Keywords:                  | IMMUNOLOGY, PAEDIATRICS, VIROLOGY                   |
|                            |                                                     |



1  
2  
3 **RECAST: An observational study for the understanding of the increased RESilience of**  
4  
5 **Children compared to Adults in SARS-CoV-2 infection**  
6  
7

8 Sebastian Stricker<sup>1</sup>, Niklas Ziegahn<sup>1</sup>, Martin Karsten<sup>2</sup>, Thomas Boeckel<sup>3</sup>, Heike Stich-Boeckel<sup>4</sup>,  
9  
10 Jakob Maske<sup>5</sup>, Evelyn Rugo<sup>2</sup>, Anita Balázs<sup>1</sup>, Pamela Millar Büchner<sup>1</sup>, Chantip Dang-Heine<sup>6</sup>,  
11  
12 Valentin Alexander Schriever<sup>7,8</sup>, Roland Eils<sup>9, 10</sup>, Irina Lehmann<sup>11, 12</sup>, Leif Erik Sander<sup>13</sup>, Markus  
13  
14 Ralser<sup>14,15</sup>, Victor Max Corman<sup>16</sup>, Marcus A. Mall<sup>1,12</sup>, Birgit Sawitzki<sup>17,18</sup>, Jobst Roehmel<sup>1,18</sup>  
15  
16  
17  
18  
19  
20

21 **Affiliations:**  
22  
23

- 24 1. Charité – Universitätsmedizin Berlin, Department of Paediatric Respiratory Medicine,  
25 Immunology and Critical Care Medicine, Augustenburger Platz 1, 13353 Berlin, Germany.  
26  
27 2. Karsten, Rugo, Wagner, paediatric practice, Aßmannshauer Str. 11a, 14197 Berlin,  
28 Germany.  
29  
30 3. Boeckel, Haverkaemper, paediatric practice and practice for paediatric cardiology, Prager  
31 Straße 10, 10779 Berlin, Germany.  
32  
33 4. Stich-Boeckel, paediatric practice, Hauptstr. 132, 10827 Berlin, Germany.  
34  
35 5. Maske, Pankok, paediatric practice, Goebenstraße 24, 10783, Berlin, Germany.  
36  
37 6. Clinical Study Center (CSC), Berlin Institute of Health at the Charité - Universitätsmedizin  
38 Berlin, Augustenburger Platz 1, 13353 Berlin, Germany.  
39  
40 7. Charité – Universitätsmedizin Berlin, Department of Paediatric Neurology,  
41 Augustenburger Platz 1, 13353 Berlin, Germany.  
42  
43 8. Charité – Universitätsmedizin Berlin, Center for Chronically Sick Children  
44 (Sozialpädiatrisches Zentrum, SPZ), Augustenburger Platz 1, 13353 Berlin, Germany  
45  
46 9. Center for Digital Health, Berlin Institute of Health at the Charité – Universitätsmedizin  
47 Berlin, Augustenburger Platz 1, 13353 Berlin, Germany.  
48  
49  
50  
51  
52  
53  
54  
55  
56  
57  
58  
59  
60

- 1
- 2
- 3 10. Molecular Epidemiology Unit, Berlin Institute of Health at the Charité –
- 4
- 5       Universitätsmedizin Berlin, Augustenburger Platz 1, 13353 Berlin, Germany.
- 6
- 7 11. Center for Digital Health, Berlin Institute of Health (BIH) at the Charité –
- 8
- 9       Universitätsmedizin Berlin.
- 10
- 11
- 12 12. German Center for Lung Research (DZL), associated partner site, Berlin, Germany
- 13
- 14 13. Department of Infectious Diseases and Respiratory Medicine, Charité –
- 15
- 16       Universitätsmedizin Berlin, Augustenburger Platz 1, 13353 Berlin, Germany.
- 17
- 18 14. Molecular Biology of Metabolism Laboratory, The Francis Crick Institute, London, UK.
- 19
- 20 15. Charité – Universitätsmedizin Berlin, Department of Biochemistry, corporate member of
- 21
- 22       Freie Universität Berlin and Humboldt-Universität zu Berlin, 10117 Berlin, Germany.
- 23
- 24 16. Charité – Universitätsmedizin Berlin, Institute of Virology, Rahel-Hirsch-Weg 3, 10117
- 25
- 26       Berlin, Germany.
- 27
- 28 17. Charité – Universitätsmedizin Berlin, Institute of Medical Immunology, Augustenburger
- 29
- 30       Platz 1, 13353 Berlin, Germany.
- 31
- 32
- 33 18. Berlin Institute of Health at the Charité - Universitätsmedizin Berlin, Anna-Louisa-Karsch-
- 34
- 35       Str. 2, 10178 Berlin, Germany.
- 36
- 37
- 38
- 39
- 40

41 **Correspondence:** Dr. Jobst Roehmel, Charité – Universitätsmedizin Berlin, Department  
42 of Paediatric Respiratory Medicine, Immunology and Critical Care Medicine,  
43 Augustenburger Platz 1, 13353 Berlin, Germany. jobst.roehmel@charite.de ; Tel.: +49  
44  
45  
46  
47  
48 450 616446.

49  
50  
51 **Word count: 3012**  
52  
53  
54  
55  
56  
57  
58  
59  
60

## ARTICLE SUMMARY

**Introduction:** The SARS-CoV-2 pandemic remains a threat to public health. Soon after its outbreak, it became apparent that children are less severely affected. Indeed, opposing clinical manifestations between children and adults are observed for other infections. The SARS-CoV-2 outbreak provides the unique opportunity to study the underlying mechanisms. This protocol describes the methods of an observational study that aims to characterize age dependent differences in immune responses to primary respiratory infections using SARS-CoV-2 as a model virus and to assess age differences in clinical outcomes including lung function.

**Methods and Analysis:** The study aims to recruit at least 120 children and 60 adults that are infected with SARS-CoV-2 and collect specimen for a multi-omics analysis, including single cell RNA sequencing of nasal epithelial cells and peripheral blood mononuclear cells, mass cytometry of whole blood samples and nasal cells, mass spectrometry-based serum and plasma proteomics, nasal epithelial cultures with functional *in vitro* analyses, SARS-CoV-2 antibody testing, sequencing of the viral genome and lung function testing. Data obtained from this multi-omics approach is correlated with medical history and clinical data. Recruitment started in October 2020 and is ongoing.

**Ethics and dissemination:** The study was reviewed and approved by the Ethics Committee of Charité – Universitätsmedizin Berlin (EA2/066/20). All collected specimens are stored in the central biobank of Charité – Universitätsmedizin Berlin and are made available to all participating researchers and on request.

The study is registered at the German Clinical Trials Register with number DRKS00025715.

1  
2  
3 **Key Words:** SARS-CoV-2, children, multiple breath washout, immune response,  
4  
5  
6 resilience, multi-omics  
7  
8  
9  
10

11 **Strengths and limitations of this study**  
12

- 13 • Sample collection from children and adults with primary SARS-CoV-2 infection at  
14 multiple time points, points, however samples from severely ill patients are not  
15 included  
16  
17  
18  
19
- 20 • Mass cytometry, single-cell RNA sequencing and mass spectrometry-based serum and  
21 plasma proteomics display the local and systemic immune response  
22  
23  
24
- 25 • Air-liquid interface cultures reproduce *in-vivo* conditions and will be used for  
26 functional studies  
27  
28  
29
- 30 • Analysis of clinical data and lung function testing complement the multi-omics  
31 approach  
32  
33  
34  
35  
36  
37  
38  
39  
40  
41  
42  
43  
44  
45  
46  
47  
48  
49  
50  
51  
52  
53  
54  
55  
56  
57  
58  
59  
60

## INTRODUCTION

In December 2019, the novel coronavirus SARS-CoV-2 emerged as cause of acute pneumonia<sup>1,2</sup>. By August 2021, more than 200 million people were infected with SARS-CoV-2<sup>3</sup>. Soon after the beginning of the pandemic, it became obvious that children have an increased resilience against the primary infection. The course of disease in children is more likely to be milder and severe or even fatal courses remain extremely rare<sup>4-8</sup>. Various hypotheses to explain the reduced susceptibility and mortality of children are currently discussed, including reduced virus entry via ACE-2 in children<sup>9</sup>, pre-activated components of the immune system, such as cross-reactive T cells<sup>10-13</sup> and antibodies<sup>14</sup>, or a more accentuated innate immunity in children [15, 16] (table 1). Most of these findings are complementary in the explanation of the observed phenomenon, however some findings are in part contradictory and require further investigation. Opposing clinical manifestations between children and adults are also observed for other viral respiratory infections<sup>15, 16, 17</sup>. This points to major changes in the general immune response pattern during aging. In the past comparative immune response analyses to primary infections in various age groups were difficult to perform, as many adults had already been exposed to the pathogens. The SARS-CoV-2 outbreak provides the unique opportunity to study the age-dependent changes in immune responses in a controlled manner.

To understand the mechanisms behind the lower susceptibility of children compared to adults to develop severe COVID-19 disease, we have established the observational study RECAST (increased **RE**silience of **C**hildren compared to **A**dults in **SARS-CoV-2** infection) focusing on the differences in the clinical presentation, lung function and the immune response to SARS-CoV-2 in children compared to adults.

**Table 1.** Hypotheses to explain the resilience of children in SARS-CoV-2 infections

| Hypothesis                                                                                                                | Proposed explanation                                                                                | Scientific findings                                                                                                                                                                                                      |
|---------------------------------------------------------------------------------------------------------------------------|-----------------------------------------------------------------------------------------------------|--------------------------------------------------------------------------------------------------------------------------------------------------------------------------------------------------------------------------|
| <b>Reduced susceptibility for SARS-CoV-2 in children</b> <sup>18</sup>                                                    | Reduced virus entry via ACE-2 in children                                                           | SARS-Cov-2 uses ACE-2 in the upper and lower airways for host cell entry <sup>19</sup><br><br>The age-dependency of ACE-2 expression is controversially discussed <sup>20 21 22</sup>                                    |
|                                                                                                                           |                                                                                                     | Even though an increased expression of ACE-2 renders the individual more susceptible to viral infection, ACE-2 also initiates anti-inflammatory signaling and might contribute to a milder immune response <sup>23</sup> |
| <b>Age-dependent differential immune activation pattern</b>                                                               | Pre-activated immune components in children entail a milder immune response                         | In early childhood, infections of the upper respiratory tract are frequent. It has been proposed that previous infections with coronaviridae might contribute to a cross-reactive immunity <sup>24</sup>                 |
|                                                                                                                           |                                                                                                     | Pre-existing T cell reactivity to SARS-CoV-2 could affect the severity of COVID-19 <sup>10-13 25</sup>                                                                                                                   |
|                                                                                                                           |                                                                                                     | Cross-reactive antibodies entail a milder immune response to SARS-CoV-2 <sup>14</sup> . Of note, uninfected infants do not express cross-reactive antibodies <sup>26</sup>                                               |
|                                                                                                                           |                                                                                                     | The polyclonality and polyreactivity of IgM naturally present in children recognizes SARS-CoV-2 particles <sup>27</sup>                                                                                                  |
|                                                                                                                           | Children possess a stronger innate immunity than adults                                             | Children display a higher basal expression of pattern recognition receptors than adults and a stronger innate antiviral response <sup>28 29</sup>                                                                        |
|                                                                                                                           |                                                                                                     | The nasopharyngeal mucosa of children exhibits a stronger innate immunity and expresses more anti-viral cytokines than adults <sup>30</sup>                                                                              |
|                                                                                                                           | Children expose a different cytokine response upon SARS-CoV-2 infection than adults                 | In COVID-19, a cytokine storm leads to acute respiratory distress syndrome <sup>31 32</sup>                                                                                                                              |
|                                                                                                                           |                                                                                                     | Certain cytokine patterns correlate with COVID-19 severity <sup>33</sup>                                                                                                                                                 |
| Pro-inflammatory cytokine concentrations might be lower in children infected with SARS-CoV-2 than in adults <sup>34</sup> |                                                                                                     |                                                                                                                                                                                                                          |
| Co-infections lead to a milder immune reaction, e.g. because of virus competition or primed immune components             | In COVID-19, Co-infection with other pathogens is not rare, especially in children <sup>35-37</sup> |                                                                                                                                                                                                                          |

1  
2  
3 The complexity of immune responses requires a multi-level approach to display changes on  
4 various layers, including local immune cell composition, cytokine signaling and systemic  
5 response. It can be assumed that the combination of several mechanisms leads to the largely  
6 different phenotypes. At the same time, modern techniques allow to engage on an  
7 exploratory approach analyzing simultaneously the involvement of canonical and non-  
8 canonical immune response patterns. The multi-omics approach presented here allows deeply  
9 detailed characterization of the various layers of age dependent specific immune responses.  
10 Therefore, we believe that the presented study design will contribute to a further  
11 understanding even beyond COVID-19.  
12  
13  
14  
15  
16  
17  
18  
19  
20  
21  
22  
23  
24  
25

26 To meet these requirements adequately, we chose a multi-omics approach, including: i) single  
27 cell RNA sequencing of peripheral blood mononuclear cells (PBMC) and nasal epithelial cells,  
28 ii) mass spectrometry-based serum and plasma proteomics, which has been used to identify  
29 prognostic marker signatures for SARS-CoV-2 disease severity and devise risk-adapted  
30 treatment strategies <sup>38</sup>, iii) mass cytometry (cytometry by time-of-flight, CyTOF) of whole  
31 blood samples and nasal cells, that has been used to elucidate the role of T cell cytotoxicity in  
32 COVID <sup>25</sup> and to identify a dysregulation of the myeloid cell compartment as hallmark of severe  
33 COVID <sup>39</sup>, iv) highly differentiated nasal epithelial cultures and functional *in vitro* analyses, that  
34 have been used to display age-related differences in the nasal epithelium <sup>40</sup>, v) antibody  
35 testing and vi) sequencing of the viral genome. Obtained data are complemented with  
36 anamnestic and clinical information, lung function testing, including spirometry and multiple  
37 breath washout, which is a standardized method which allows to assess the ventilation  
38 homogeneity of the lungs already in preschool children as well as smell and taste. Longitudinal  
39 sampling allows monitoring of the immune response over the course of disease and beyond.  
40 Due to the maturation of the immune system during childhood, age-specific immune response  
41  
42  
43  
44  
45  
46  
47  
48  
49  
50  
51  
52  
53  
54  
55  
56  
57  
58  
59  
60



1  
2  
3 pattern against SARS-CoV-2 can be expected <sup>41 42</sup>. Thus participants of all age groups are  
4  
5 enrolled.  
6  
7

8 Participant recruitment began in October 2020 and is ongoing. Of particular interest is the  
9  
10 recruitment of children infected with various SARS-CoV-2 virus variants of concern.  
11  
12  
13

### 14 15 **Study objectives** 16

17  
18 This study aims to characterize and compare primary infections with SARS-CoV-2 in children  
19  
20 and adults, and to identify age-related determinants of disease course and prognosis. The  
21  
22 immune system is not only highly complex, but immune response patterns also vary  
23  
24 depending on individual predisposition; moreover, it also matures throughout the ageing of  
25  
26 an individual. Furthermore, of pivotal interest for the interpretation of these data is the  
27  
28 correlation between immune response pattern and clinical outcome.  
29  
30  
31  
32  
33

## 34 **METHODS AND ANALYSIS** 35

### 36 37 **Study design** 38

39  
40 RECAST is a prospective observational cohort study at Charité – Universitätsmedizin Berlin in  
41  
42 Berlin, Germany. It is a sub-study of the Pa-COVID study of the Charité <sup>43</sup>, aiming to characterize  
43  
44 the disease course of patients suffering from COVID-19.  
45  
46  
47

48 Data is collected longitudinally from patients with confirmed COVID-19 at three time points,  
49  
50 directly after the diagnosis and at follow-up visits after two weeks and four to six months, and  
51  
52 from healthy age-matched controls.  
53  
54

55  
56 Recruitment started in October 2020 and is planned to end in October 2023.  
57  
58  
59  
60

## Study population

### Inclusion criteria

Main inclusion criteria for the index person is a primary acute SARS-CoV-2 infection in a minor (< 18 years of age) with positive PCR or antigen testing (both will be confirmed by PCR testing).

### Exclusion criteria

Subjects with preexisting conditions affecting the immune response, such as diseases requiring chemotherapy or syndromes with immunodeficiency and subjects with concomitant medication that affects the immune response, such as systemic steroids, biologicals or investigational therapeutics targeting SARS-CoV-2, are excluded.

## Study procedures

### Patient identification and recruitment

A network of participating pediatric outpatient practices (n=20) has been established as sentinels to provide access to a pool of >25.000 pediatric patients. All children who tested positive for SARS-CoV2 by PCR or antigen testing as well as their household members are eligible for inclusion.

Healthy controls are recruited from clinical routine diagnostic settings if the diagnostic screening for SARS-CoV-2 was negative.

### Medical history, clinical assessment and functional testing

Assessed data include epidemiological and demographic parameters, medical history and potential risk factors, clinical course – including all diagnostic results of the present medical

1  
2  
3 attendance – and household and family constellation. A complete list of all items is attached  
4  
5 in the appendix (table E1).  
6  
7

8 Data are collected at first contact and during the follow-up visits. Symptoms of post- / long-  
9 COVID <sup>44</sup> are documented and symptoms of myalgic encephalomyelitis / chronic fatigue  
10 syndrome are assessed with the Canadian consensus criteria <sup>45 46</sup>, Chalder Fatigue Scale <sup>47</sup> and  
11 PedsQL™ Multidimensional Fatigue Scale <sup>48-56</sup>. Loss of smell and taste are assessed with the  
12 “U-Sniff” test, a 12-item odor identification, the “Sniffin' Sticks” olfactory threshold test and  
13 taste samples for sweet, sour, salty, and bitter tastes in children aged six years or older <sup>57 58</sup>.  
14  
15 For adults, health status and quality of life are assessed with the St George's Respiratory  
16 Questionnaire <sup>59</sup> and health status and mental health are evaluated with PHQ-9 <sup>60</sup> and PCL-5  
17  
18 <sup>61</sup> questionnaires. For children, quality of life is assessed using the KINDL questionnaire <sup>62</sup>.  
19  
20  
21  
22

23 Disease severity is classified according to clinical features using the criteria outlined in the  
24 WHO COVID-19 clinical management guideline <sup>63</sup> as asymptomatic, mild, moderate, severe or  
25 critical disease. Also, clinical progression is classified according to the WHO clinical progression  
26 scale <sup>64</sup>. Applied classification scales are shown in tables 2 and 3.  
27  
28  
29

30 Functional testing, including lung function testing and multiple breath washout, will be  
31 conducted at the follow-up visits after two weeks and four to six months.  
32  
33  
34  
35  
36  
37  
38  
39

#### 40 41 42 43 44 45 46 47 48 **Patient and public involvement** 49

50 We will disseminate all findings in an appropriate and understandable manner to all  
51 participants, including children. We welcome the collaboration of participants and public in  
52 the interpretation and dissemination of all findings.  
53  
54  
55  
56  
57  
58  
59  
60

**Table 2.** COVID disease severity.

Abbreviated criteria for COVID-19 disease severity according to WHO COVID-19 Clinical management guideline<sup>63</sup>.

| Patient State                                 | Descriptor                                                                              | Score |
|-----------------------------------------------|-----------------------------------------------------------------------------------------|-------|
| <b>Uninfected</b>                             | Uninfected; no viral RNA detected                                                       | 0     |
| <b>Ambulatory:<br/>mild<br/>disease</b>       | Asymptomatic; viral RNA detected                                                        | 1     |
|                                               | Symptomatic; independent                                                                | 2     |
|                                               | Symptomatic; assistance needed                                                          | 3     |
| <b>Hospitalized:<br/>moderate<br/>disease</b> | Hospitalized; no oxygen therapy                                                         | 4     |
|                                               | Hospitalized; oxygen by mask or nasal prongs                                            | 5     |
| <b>Hospitalized:<br/>severe<br/>disease</b>   | Hospitalized; oxygen by NIV or high flow                                                | 6     |
|                                               | Intubation and mechanical ventilation, $pO_2/pFiO_2 \geq 150$ or $SpO_2/FiO_2 \geq 200$ | 7     |
|                                               | Mechanical ventilation, $pO_2/pFiO_2 < 150$ ( $SpO_2/FiO_2 < 200$ ) or vasopressors     | 8     |
|                                               | Mechanical ventilation, $pO_2/pFiO_2 < 150$ and vasopressors, dialysis or ECMO          | 9     |
| <b>Dead</b>                                   | Dead                                                                                    | 10    |

**Table 3.** WHO clinical progression scale.Modified from WHO working group <sup>64</sup>.

| Disease severity        | Definition                                                                | Criteria                                                                                                                                                                                                                                                                                                                                                                                                                                     |
|-------------------------|---------------------------------------------------------------------------|----------------------------------------------------------------------------------------------------------------------------------------------------------------------------------------------------------------------------------------------------------------------------------------------------------------------------------------------------------------------------------------------------------------------------------------------|
| <b>Asymptomatic</b>     |                                                                           |                                                                                                                                                                                                                                                                                                                                                                                                                                              |
| <b>Mild</b>             |                                                                           | Symptomatic patients meeting the case definition for COVID-19 without evidence of viral pneumonia or hypoxia                                                                                                                                                                                                                                                                                                                                 |
| <b>Moderate</b>         | Pneumonia                                                                 | Clinical signs of (non-severe) pneumonia<br>Adolescent or adult: Fever, cough, dyspnoea, fast breathing<br>Child: Cough or difficulty breathing + fast breathing and/or chest indrawing<br>Diagnosis can be made on clinical grounds; chest imaging (radiograph, CT scan, ultrasound) may assist in diagnosis and identify or exclude pulmonary complications.                                                                               |
| <b>Severe</b>           | Severe pneumonia                                                          | Adolescent or adult: Plus one of the following: respiratory rate > 30 breaths/min; severe respiratory distress; or SpO <sub>2</sub> < 90% on room air<br>Child: Plus at least one of the following: Central cyanosis or SpO <sub>2</sub> < 90%; severe respiratory distress (e.g. fast breathing, grunting, very severe chest indrawing); general danger sign: inability to breastfeed or drink, lethargy or unconsciousness, or convulsions |
| <b>Critical disease</b> | Acute respiratory distress syndrome (ARDS)<br>OR<br>sepsis / septic shock | Oxygenation impairment, invasive ventilation or bilevel NIV / CPAP (≥ 5 cmH <sub>2</sub> O) required<br>OR<br>Infection and ≥ 2 Systemic Inflammatory Response Syndrome (SIRS) criteria                                                                                                                                                                                                                                                      |

### Sample collection

Samples will be collected from SARS-CoV-2 positive participants at each of three time points, directly after the diagnosis and at follow-up visits after two weeks and four to six months, and once from healthy age-matched controls.

Nasal and pharyngeal swab samples are collected for a SARS-CoV-2-PCR, single-cell RNA sequencing and establishment of air-liquid cell cultures. In addition, peripheral blood mononuclear cells (PBMCs) are collected for single-cell sequencing, whole blood for mass cytometry and plasma and serum for mass-spectrometry based proteomics, and SARS-CoV-2-specific antibody testing.

### Study database

For Pa-COVID-19 a study protocol was established that harmonizes clinical, molecular, and immunological phenotyping assessment in COVID-19 patients<sup>43</sup>. All data are added to an electronic case report form (eCRF; SecuTrial®). Participants included in RECAST are part of Pa-COVID-19. All participants are assigned a pseudonym consisting of a six- or seven-digit alphanumerical participant code. A separate log allows to match each participant and their code. Access to SecuTrial® requires username and password. All local data are secured by password.

### Sample description

Patients recruited in RECAST are grouped into six age categories (table 4). Due to the nature of observatory studies and the lack of pre-existing data, it is not possible to predict the extent of assumptive differences. Preliminary findings suggest that for most planned analyses a sample size of 15 is sufficient. The outlined sample sizes should suffice even for comparisons between children of different age groups.

**Table 4.** Age categories of the RECAST participants.

| Age group       |                                | Disease state | Number       | Timepoints         |
|-----------------|--------------------------------|---------------|--------------|--------------------|
| <b>Children</b> | Nursery (0-3 years)            | SARS-CoV2 -   | ≥ 30         | 1                  |
|                 |                                | SARS-CoV2 +   | ≥ 30         | 3 (day 0, 14, 180) |
|                 | Kindergarten (3-6 years)       | SARS-CoV2 -   | ≥ 30         | 1                  |
|                 |                                | SARS-CoV2 +   | ≥ 30         | 3 (day 0, 14, 180) |
|                 | Primary school (6-12 years)    | SARS-CoV2 -   | ≥ 30         | 1                  |
|                 |                                | SARS-CoV2 +   | ≥ 30         | 3 (day 0, 14, 180) |
|                 | Secondary school (13-18 years) | SARS-CoV2 -   | ≥ 30         | 1                  |
|                 |                                | SARS-CoV2 +   | ≥ 30         | 3 (day 0, 14, 180) |
| <b>Adults</b>   | <60 years                      | SARS-CoV2 -   | ≥ 30         | 1                  |
|                 |                                | SARS-CoV2 +   | ≥ 30         | 3 (day 0, 14, 180) |
|                 | >60 years                      | SARS-CoV2 -   | ≥ 30         | 1                  |
|                 |                                | SARS-CoV2 +   | ≥ 30         | 3 (day 0, 14, 180) |
| <b>TOTAL</b>    |                                |               | ≥ <b>360</b> | ≥ <b>720</b>       |

## PLANNED ANALYSES AND OUTCOMES OF INTEREST

We propose a multi-omics workup for all patients. A synopsis of the planned analyses is depicted in figure 1.

### **SARS-CoV-2-specific PCR and antibody testing**

All participants are screened for an active SARS-CoV-2 infection with RT-qPCRs targeting E and N genes<sup>65</sup>. Antibody testing is conducted for all serum and saliva samples with SARS-CoV-2-specific IgG- and IgA-ELISAs. In case of a reactive screening result, confirmatory testing with a recombinant Immunofluorescence assay (IFA) and a plaque reduction neutralization test<sup>66</sup> are conducted.

### **Nasal epithelial culture and functional *in-vitro* analyses**

Conditional reprogramming allows for the generation of long-term cultures of primary airway epithelial cells<sup>67-71</sup>. Without the need of genetic modification or clone selection, conditional reprogramming enables cell expansion, while re-differentiated cultures retain their organ-specific phenotype<sup>72</sup>. We establish highly differentiated polarized *in-vitro* air-liquid interface cultures that reproduce and allow for the analysis of physiological *in-vivo* conditions, such as heterogeneous cell composition with preserved lineage<sup>73</sup> as well as functional characteristics, including production of airway surface liquid<sup>74 75</sup> and mucociliary clearance<sup>76 77</sup>. For material collection, FLOQswabs (Copan, Italy) are used. Swabs are transferred into DMEM/F12 medium (Gibco, USA) and transported to our laboratory within two hours.

### **Mass cytometry of whole blood samples**

Whole blood is fixed with a proteomic stabilizer for preservation of surface and intracellular markers. Blood samples are stored at -80 °C until batch-based analysis. Thawed samples are stained in batches of nine patient and one anchor reference sample. Upon barcoding of



1  
2  
3 individual samples, they are pooled and stained with metal isotype conjugated anti-human  
4  
5 antibodies as described previously <sup>25 39</sup>. CyTOF technology allows for the detection of more  
6  
7 than 40 different barcodes simultaneously to identify cell populations in a high-throughput  
8  
9 setting [19, 75].  
10  
11

### 12 13 **Mass spectrometry-based serum and plasma proteomics**

14  
15  
16 A platform technology with semi-automated sample preparation to allow for ultra-high-  
17  
18 throughput liquid chromatography and mass-spectrometry based analyses of the proteome  
19  
20 has recently been established by members of our group <sup>78</sup>. In a directed approach, we  
21  
22 characterize the immune response-related serum and plasma proteome, with focus on the  
23  
24 acute phase response and the complement system. However, the plethora of proteome  
25  
26 signals that are generated per sample also allows for an undirected approach, delivering  
27  
28 predictive proteome signatures. To facilitate the computation of such extensive bulk data, a  
29  
30 deep neural network is employed <sup>79</sup>.  
31  
32  
33  
34  
35

### 36 37 **Single-cell sequencing of nasal epithelial cell samples and PBMCs**

38  
39 The nasopharynx is the entry point for an infection with SARS-CoV-2 <sup>80</sup> and as such of  
40  
41 distinguished concern in the exploration of the individual immune response pattern. Using  
42  
43 single-cell RNA sequencing (scRNAseq) of nasal and bronchial samples, we were previously  
44  
45 able to identify cell types and states that correlate with a severe disease course of COVID-19  
46  
47 <sup>81</sup>. Here, scRNAseq will be applied to define the composition and transcriptional activity of  
48  
49 immune and epithelial cells in the nasal environment of children and adults throughout the  
50  
51 various states of SARS-CoV-2 infection. Nasal swabs (FLOQswabs, Copan, Italy) are used for  
52  
53 sample collection. Following sample collection, swabs are directly transferred into cold  
54  
55 DMEM/F12 medium (Gibco, USA) and transported to our biosafety laboratory within one hour  
56  
57  
58  
59  
60

1  
2  
3 for further processing. Library preparation is performed according to manufacturer's protocol  
4  
5 (10x) and sequencing is performed using the Illumina NextSeq 6000 platform.  
6  
7

8  
9 In addition to the analysis of cells in the respiratory environment, PBMCs are isolated to study  
10  
11 the transcriptional activity of blood cell populations. Cell separation, library preparation and  
12  
13 comparative single cell transcriptome analyses are conducted according to the manufacturer's  
14  
15 protocol. Differential transcriptome profiles of immune cells of the blood will help us to  
16  
17 characterize the distinctive features of the systemic and localized immune response to SARS-  
18  
19 CoV-2 infections in children and adults.  
20  
21  
22

### 23 24 **Lung function testing and multiple breath washout**

25  
26  
27 SARS-CoV-2 infections cause severe lung damage in adults <sup>31 32</sup>. In a large review with 2135  
28  
29 children, 45% (951 children) were classified with a severity of moderate, severe or critical, all  
30  
31 with lung involvement per definition <sup>7</sup>. There is evidence that children with acute lung injury  
32  
33 experience the same lung pathologies as adults <sup>82</sup>. To assess the extent of transient and  
34  
35 permanent functional lung impairment, we investigate the lung function with spirometry and  
36  
37 multiple breath washout (MBW). MBW measures the lung ventilation homogeneity <sup>83 84</sup>. This  
38  
39 technique is already feasible without sedation in children from 2 years of age <sup>84</sup>. Spirometry  
40  
41 depends on the cooperation of the participant and may usually be conducted with children  
42  
43 aged six years or older. The technical MBW procedures are in accordance with the American  
44  
45 Thoracic Society Technical Statement <sup>85</sup>. Measurements are conducted by certified personnel  
46  
47 (ECFS-CTN certified) and for study measurements Exhalyzer D (Ecomedics, Dürnden,  
48  
49 Switzerland) will be used <sup>86</sup>. N<sub>2</sub> washout is used as tracer gas to determine the lung clearance  
50  
51 index as outcome measure. The lung clearance index (LCI) increases with lung ventilation  
52  
53 inhomogeneity.  
54  
55  
56  
57  
58  
59  
60

## Biobanking

Collected material is processed and stored at the central biobank of Charité (ZeBanC, <https://biobank.charite.de>). Material that is not immediately used is subjected to cryopreservation.

## ETHICS AND DISSEMINATION

All procedures in this study are in compliance with the principles of the 1964 Declaration of Helsinki and its amendments. We act in adherence to the principles of Good Clinical Practice (International Council for Harmonization, ICH 1996). The study was reviewed and approved by the Charité Ethics Committee (EA2/066/20). All participants enrolled give written informed consent in person, for participants minor of age the written informed consent of the legal guardian is also required.

Study procedures never interfere with the medical management of participants. Samples required for medical management always have priority. There is no direct benefit for patients participating in the study. Results from the study might improve our understanding of the disease and benefit the public health.

Data is monitored regularly. Informed consent forms are audited by a monitor appointed by the Charité Clinical Trial Management Unit. Data monitoring of collected data is performed in the course of the study.

As established for Pa-COVID<sup>43</sup>, we reiterate the fundamental principle in this study that all contributors and researchers who have access to samples commit to unrestricted data sharing. In accordance with FAIR data principles, all data collected shall be findable, accessible, interoperable, and re-usable<sup>87</sup>

1  
2  
3 Results originating from nasal epithelial culture and functional in-vitro analyses, mass  
4  
5 cytometry, mass spectrometry-based proteomics, single-cell sequencing and lung function  
6  
7 testing and multiple breath washout as well as clinical data will be will be disseminated  
8  
9 separately or in context in a variety of ways including abstracts, posters and presentations at  
10  
11 conferences and published manuscripts in peer-reviewed journals. As soon as all analyses are  
12  
13 completed, a comprehensive review will be published to put the findings in context of each  
14  
15 other.  
16  
17  
18  
19  
20  
21

## 22 **DISCUSSION**

23  
24 The SARS-CoV-2 pandemic has accelerated scientific research in the field of virology and  
25  
26 related immunobiology for nearly two years, yet many crucial questions remain unanswered.  
27  
28 Soon after the emergence of the virus it became apparent that, while children are just as likely  
29  
30 to be infected with SARS-CoV-2 as adults, they are less severely affected <sup>4-8 88</sup>. RECAST is an  
31  
32 observational study that aims to elucidate the differences between children and adults in  
33  
34 primary SARS-CoV-2 infections using a multi-omics approach. Revealing age-dependent  
35  
36 differences will help to develop better suited therapeutics and vaccination strategies beyond  
37  
38 SARS-CoV-2 infections.  
39  
40  
41  
42  
43  
44

45 Previous multi-omics approaches conducted with specimen from adult donors served to  
46  
47 elucidate the immune response in COVID <sup>81 89</sup>, to identify predictors of severe disease courses  
48  
49 <sup>90 91</sup> and to isolate possible targets for therapy <sup>81 91 92</sup>. Multi-omics-based studies focusing on  
50  
51 SARS-CoV-2 infections in children remain rare and are limited to small participant numbers  
52  
53 and only analyze a limited number of –omics dimensions: A study including 24 infected  
54  
55 children analyzed the single-cell transcriptional landscape in the upper airways <sup>28</sup>; with single-  
56  
57 cell multi-omic profiling of matched nasal, tracheal, bronchial and blood samples of 19  
58  
59  
60

1  
2  
3 infected children, a study characterized the immune landscape with focus on the upper  
4  
5 airways<sup>29</sup>; the plasma proteomic and metabolomic data of 18 infected children was analyzed  
6  
7  
8 in another study<sup>93</sup>; clinical characteristics and serum markers were analyzed in a larger group  
9  
10 that summarized children and young adults and T cell response in a pediatric subgroup of 11  
11  
12 participants was examined<sup>94</sup>; and a study with 24 infected children analyzed the T cell  
13  
14 response and specific antibody response<sup>95</sup>. Even though these studies contributed greatly to  
15  
16 a better understanding of age-related immune response patterns in COVID-19, there is still a  
17  
18 substantial demand for research. Especially studies analyzing the immune response over the  
19  
20 whole age and severity spectrum applying a multi-omics approach are needed. In addition,  
21  
22 mechanistic investigations, revealing the causal relationship between the different immune  
23  
24 defense layers, are missing. In RECAST, we will conduct a full multi-omics workup with at least  
25  
26 120 infected children, a larger number of participants than in previously published multi-omics  
27  
28 studies. Moreover, we will conduct follow-up visits for 6 months to profile the development  
29  
30 of age-specific immune response patterns over the course of time. Biobanking and long-term  
31  
32 storage of samples will be used to perform subsequent mechanistic studies upon first data  
33  
34 collection and hypotheses formulation. The recruitment of family members, both infected and  
35  
36 non-infected, allows to assess the effect of genetic relationships. The combination of high  
37  
38 resolution multi-dimensional immunologic methods with clinical endpoints in the RECAST  
39  
40 study will enable us to contribute to the understanding of the increased resilience of children  
41  
42 to SARS-CoV-2 infections.  
43  
44  
45  
46  
47  
48  
49  
50  
51  
52  
53  
54  
55  
56  
57  
58  
59  
60

### **Data availability statement**

The original data sets collected during the current study are available upon reasonable request that is of scientific nature and aims to achieve the goals described in this publication. This includes all individual participant data collected during the trial, after deidentification. The informed consent forms are available for monitoring at our study center for entitled personnel. Data will be available immediately, until 10 years after the study has concluded. Proposals should be directed to [jobst.roehmel@charite.de](mailto:jobst.roehmel@charite.de) (<https://orcid.org/0000-0002-1535-8852>).

### **Author Contributions:**

BS, JR, MM, VC, MR and LS initiated the project and led the BMBF grant proposal. All authors contributed to the design of the study. SS, JR, NZ, MK, TB, HSB, JM and ER are collecting data biological material and are conducting functional testing. BS, MM, VC, MR, LS, IL, RE, JR and VS lead their respective research field and supervise the conduction of experiments and the interpretation of results. CDH, PMB and AB are conducting experiments. SS and JR produced the first draft of the protocol. All authors provided critical review of the manuscript and have approved the final version.

### **Funding statement:**

This work was supported by the German Federal Ministry of Education and Research (grant number 01KI20337).

### **Competing interests statement:**

SS, NZ, MK, HSB, JM, ER, AB, PMB, CDH, VAS, RE, IL, MR, MM, BS and JR have no conflict of interest related to this study. TB received payments for his participation in an advisory board for vaccination against SARS-CoV-2. VC has a patent pending in the diagnosis of SARS-CoV-2

1  
2  
3 infections. LS was involved in further studies relating to SARS-CoV-2 that were funded by  
4  
5 national grants.  
6  
7

8  
9 **Acknowledgements:**

10  
11 We thank participating children and their families for their close collaboration. We also thank  
12  
13 all outpatient pediatricians who are involved in the recruitment.  
14  
15  
16  
17  
18  
19  
20  
21  
22  
23  
24  
25  
26  
27  
28  
29  
30  
31  
32  
33  
34  
35  
36  
37  
38  
39  
40  
41  
42  
43  
44  
45  
46  
47  
48  
49  
50  
51  
52  
53  
54  
55  
56  
57  
58  
59  
60

For peer review only

## REFERENCES

1. Zhou P, Yang XL, Wang XG, et al. A pneumonia outbreak associated with a new coronavirus of probable bat origin. *Nature* 2020;579(7798):270-73. doi: 10.1038/s41586-020-2012-7 [published Online First: 2020/02/06]
2. Zhu N, Zhang D, Wang W, et al. A Novel Coronavirus from Patients with Pneumonia in China, 2019. *N Engl J Med* 2020;382(8):727-33. doi: 10.1056/NEJMoa2001017 [published Online First: 2020/01/25]
3. Organization WH. WHO COVID-19 Dashboard. 2020
4. Liguoro I, Pilotto C, Bonanni M, et al. SARS-COV-2 infection in children and newborns: a systematic review. *Eur J Pediatr* 2020;179(7):1029-46. doi: 10.1007/s00431-020-03684-7 [published Online First: 2020/05/20]
5. Castagnoli R, Votto M, Licari A, et al. Severe Acute Respiratory Syndrome Coronavirus 2 (SARS-CoV-2) Infection in Children and Adolescents: A Systematic Review. *JAMA Pediatr* 2020;174(9):882-89. doi: 10.1001/jamapediatrics.2020.1467 [published Online First: 2020/04/23]
6. Zhou F, Yu T, Du R, et al. Clinical course and risk factors for mortality of adult inpatients with COVID-19 in Wuhan, China: a retrospective cohort study. *Lancet* 2020;395(10229):1054-62. doi: 10.1016/S0140-6736(20)30566-3 [published Online First: 2020/03/15]
7. Dong Y, Mo X, Hu Y, et al. Epidemiology of COVID-19 Among Children in China. *Pediatrics* 2020;145(6):e20200702. doi: 10.1542/peds.2020-0702
8. Bhopal SS, Bagaria J, Olabi B, et al. Children and young people remain at low risk of COVID-19 mortality. *Lancet Child Adolesc Health* 2021;5(5):e12-e13. doi: 10.1016/S2352-4642(21)00066-3 [published Online First: 2021/03/14]
9. Dioguardi M, Cazzolla AP, Arena C, et al. Innate Immunity in Children and the Role of ACE2 Expression in SARS-CoV-2 Infection. *Pediatr Rep* 2021;13(3):363-82. doi: 10.3390/pediatric13030045 [published Online First: 2021/07/22]
10. Mateus J, Grifoni A, Tarke A, et al. Selective and cross-reactive SARS-CoV-2 T cell epitopes in unexposed humans. *Science* 2020;370(6512):89-94. doi: 10.1126/science.abd3871 [published Online First: 2020/08/06]
11. Shrock E, Fujimura E, Kula T, et al. Viral epitope profiling of COVID-19 patients reveals cross-reactivity and correlates of severity. *Science* 2020;370(6520) doi: 10.1126/science.abd4250 [published Online First: 2020/10/01]
12. Loyal L, Braun J, Henze L, et al. Cross-reactive CD4(+) T cells enhance SARS-CoV-2 immune responses upon infection and vaccination. *Science* 2021;374(6564):eabh1823. doi: 10.1126/science.abh1823 [published Online First: 2021/09/02]
13. Braun J, Loyal L, Frentsch M, et al. SARS-CoV-2-reactive T cells in healthy donors and patients with COVID-19. *Nature* 2020;587(7833):270-74. doi: 10.1038/s41586-020-2598-9 [published Online First: 2020/07/30]
14. Guo L, Wang Y, Kang L, et al. Cross-reactive antibody against human coronavirus OC43 spike protein correlates with disease severity in COVID-19 patients: a retrospective study. *Emerg Microbes Infect* 2021;10(1):664-76. doi: 10.1080/22221751.2021.1905488 [published Online First: 2021/03/19]
15. Coates BM, Staricha KL, Wiese KM, et al. Influenza A Virus Infection, Innate Immunity, and Childhood. *JAMA Pediatr* 2015;169(10):956-63. doi: 10.1001/jamapediatrics.2015.1387 [published Online First: 2015/08/04]
16. Prendergast AJ, Klenerman P, Goulder PJ. The impact of differential antiviral immunity in children and adults. *Nat Rev Immunol* 2012;12(9):636-48. doi: 10.1038/nri3277
17. Nam HH, Ison MG. Respiratory syncytial virus infection in adults. *BMJ* 2019;366:l5021. doi: 10.1136/bmj.l5021 [published Online First: 20190910]
18. Viner RM, Mytton OT, Bonell C, et al. Susceptibility to SARS-CoV-2 Infection Among Children and Adolescents Compared With Adults: A Systematic Review and Meta-



- analysis. *JAMA Pediatr* 2021;175(2):143-56. doi: 10.1001/jamapediatrics.2020.4573 [published Online First: 2020/09/26]
19. Hoffmann M, Kleine-Weber H, Schroeder S, et al. SARS-CoV-2 Cell Entry Depends on ACE2 and TMPRSS2 and Is Blocked by a Clinically Proven Protease Inhibitor. *Cell* 2020;181(2):271-80.e8. doi: 10.1016/j.cell.2020.02.052
20. Zhang Z, Guo L, Huang L, et al. Distinct disease severity between children and older adults with COVID-19: Impacts of ACE2 expression, distribution, and lung progenitor cells. *Clin Infect Dis* 2021 doi: 10.1093/cid/ciaa1911 [published Online First: 2021/01/04]
21. Yonker LM, Neilan AM, Bartsch Y, et al. Pediatric Severe Acute Respiratory Syndrome Coronavirus 2 (SARS-CoV-2): Clinical Presentation, Infectivity, and Immune Responses. *J Pediatr* 2020;227:45-52 e5. doi: 10.1016/j.jpeds.2020.08.037 [published Online First: 2020/08/23]
22. Koch CM, Prigge AD, Anekalla KR, et al. Immune response to SARS-CoV-2 in the nasal mucosa in children and adults. *medRxiv* 2021 doi: 10.1101/2021.01.26.21250269 [published Online First: 2021/02/04]
23. Felsenstein S, Hedrich CM. SARS-CoV-2 infections in children and young people. *Clin Immunol* 2020;220:108588. doi: 10.1016/j.clim.2020.108588 [published Online First: 2020/09/10]
24. Lee CH, Pinho MP, Buckley PR, et al. Potential CD8+ T Cell Cross-Reactivity Against SARS-CoV-2 Conferred by Other Coronavirus Strains. *Front Immunol* 2020;11:579480. doi: 10.3389/fimmu.2020.579480 [published Online First: 2020/12/01]
25. Georg P, Astaburuaga-García R, Bonaguro L, et al. Complement activation induces excessive T cell cytotoxicity in severe COVID-19. *Cell* 2021 doi: <https://doi.org/10.1016/j.cell.2021.12.040>
26. Fraley E, LeMaster C, Banerjee D, et al. Cross-reactive antibody immunity against SARS-CoV-2 in children and adults. *Cell Mol Immunol* 2021;18(7):1826-28. doi: 10.1038/s41423-021-00700-0 [published Online First: 2021/06/02]
27. Massalska MA, Gober HJ. How Children Are Protected From COVID-19? A Historical, Clinical, and Pathophysiological Approach to Address COVID-19 Susceptibility. *Front Immunol* 2021;12:646894. doi: 10.3389/fimmu.2021.646894 [published Online First: 2021/06/29]
28. Loske J, Rohmel J, Lukassen S, et al. Pre-activated antiviral innate immunity in the upper airways controls early SARS-CoV-2 infection in children. *Nat Biotechnol* 2021 doi: 10.1038/s41587-021-01037-9 [published Online First: 2021/08/20]
29. Yoshida M, Worlock KB, Huang N, et al. Local and systemic responses to SARS-CoV-2 infection in children and adults. *Nature* 2022;602(7896):321-27. doi: 10.1038/s41586-021-04345-x [published Online First: 2021/12/23]
30. Pierce CA, Sy S, Galen B, et al. Natural mucosal barriers and COVID-19 in children. *JCI Insight* 2021;6(9) doi: 10.1172/jci.insight.148694 [published Online First: 2021/04/07]
31. Fajgenbaum DC, June CH. Cytokine Storm. *New England Journal of Medicine* 2020;383(23):2255-73. doi: 10.1056/NEJMra2026131
32. Kommos FKF, Schwab C, Tavernar L, et al. The Pathology of Severe COVID-19-Related Lung Damage. *Dtsch Arztebl Int* 2020;117(29-30):500-06. doi: 10.3238/arztebl.2020.0500 [published Online First: 2020/09/01]
33. Ozsurekci Y, Aykac K, Er AG, et al. Predictive value of cytokine/chemokine responses for the disease severity and management in children and adult cases with COVID-19. *J Med Virol* 2021;93(5):2828-37. doi: 10.1002/jmv.26683 [published Online First: 2020/11/24]
34. Jia R, Wang X, Liu P, et al. Mild Cytokine Elevation, Moderate CD4(+) T Cell Response and Abundant Antibody Production in Children with COVID-19. *Viol Sin* 2020;35(6):734-43. doi: 10.1007/s12250-020-00265-8 [published Online First: 2020/07/24]
35. Schneider JG, Relich RF, Datta D, et al. Identifying Risk Factors That Distinguish Symptomatic Severe Acute Respiratory Syndrome Coronavirus 2 Infection From

- 1  
2  
3 Common Upper Respiratory Infections in Children. *Cureus* 2021;13(2):e13266. doi:  
4 10.7759/cureus.13266 [published Online First: 2021/03/18]
- 5 36. Wu Q, Xing Y, Shi L, et al. Coinfection and Other Clinical Characteristics of COVID-19 in  
6 Children. *Pediatrics* 2020;146(1) doi: 10.1542/peds.2020-0961 [published Online  
7 First: 2020/05/08]
- 8 37. Li Y, Wang H, Wang F, et al. Co-infections of SARS-CoV-2 with multiple common  
9 respiratory pathogens in infected children: A retrospective study. *Medicine (Baltimore)*  
10 2021;100(11):e24315. doi: 10.1097/MD.00000000000024315 [published Online First:  
11 2021/03/18]
- 12 38. Demichev V, Tober-Lau P, Lemke O, et al. A time-resolved proteomic and prognostic  
13 map of COVID-19. *Cell Syst* 2021 doi: 10.1016/j.cels.2021.05.005 [published Online  
14 First: 2021/06/18]
- 15 39. Schulte-Schrepping J, Reusch N, Paclik D, et al. Severe COVID-19 Is Marked by a  
16 Dysregulated Myeloid Cell Compartment. *Cell* 2020;182(6):1419-40 e23. doi:  
17 10.1016/j.cell.2020.08.001 [published Online First: 2020/08/19]
- 18 40. Anita Balázs PM-B, Michael Mülleler, Vadim Farztdinov, Lukasz Szyrwiell, Annalisa  
19 Addante, Aditi Kuppe, Tihomir Rubil, Marika Drescher, Kathrin Seidel, Sebastian  
20 Stricker, Roland Eils, Irina Lehmann, Birgit Sawitzki, Jobst Röhmel, Markus Ralser  
21 and Marcus Mall. Age-related differences in structure and function of nasal epithelial  
22 cultures from healthy children and elderly people. *Frontiers in Immunology* 2022
- 23 41. Shaw AC, Goldstein DR, Montgomery RR. Age-dependent dysregulation of innate  
24 immunity. *Nat Rev Immunol* 2013;13(12):875-87. doi: 10.1038/nri3547 [published  
25 Online First: 2013/10/26]
- 26 42. Simon AK, Hollander GA, McMichael A. Evolution of the immune system in humans from  
27 infancy to old age. *Proc Biol Sci* 2015;282(1821):20143085. doi:  
28 10.1098/rspb.2014.3085 [published Online First: 2015/12/25]
- 29 43. Kurth F, Roennefarth M, Thibeault C, et al. Studying the pathophysiology of coronavirus  
30 disease 2019: a protocol for the Berlin prospective COVID-19 patient cohort (Pa-  
31 COVID-19). *Infection* 2020;48(4):619-26. doi: 10.1007/s15010-020-01464-x
- 32 44. Koczulla AR, Ankermann T, Behrends U, et al. [S1 Guideline Post-COVID/Long-COVID].  
33 *Pneumologie* 2021 doi: 10.1055/a-1551-9734 [published Online First: 2021/09/03]
- 34 45. Carruthers BM, Jain AK, De Meirleir KL, et al. Myalgic Encephalomyelitis/Chronic Fatigue  
35 Syndrome. *Journal of Chronic Fatigue Syndrome* 2003;11(1):7-115. doi:  
36 10.1300/j092v11n01\_02
- 37 46. Kedor C, Freitag H, Meyer-Arndt L, et al. Chronic COVID-19 Syndrome and Chronic  
38 Fatigue Syndrome (ME/CFS) following the first pandemic wave in Germany – a first  
39 analysis of a prospective observational study: Cold Spring Harbor Laboratory, 2021.
- 40 47. Chalder T, Berelowitz G, Pawlikowska T, et al. Development of a fatigue scale. *J*  
41 *Psychosom Res* 1993;37(2):147-53. doi: 10.1016/0022-3999(93)90081-p [published  
42 Online First: 1993/01/01]
- 43 48. Varni JW, Burwinkle TM, Katz ER, et al. The PedsQL in pediatric cancer: reliability and  
44 validity of the Pediatric Quality of Life Inventory Generic Core Scales,  
45 Multidimensional Fatigue Scale, and Cancer Module. *Cancer* 2002;94(7):2090-106.  
46 doi: 10.1002/cncr.10428 [published Online First: 2002/04/05]
- 47 49. Daniel LC, Brumley LD, Schwartz LA. Fatigue in adolescents with cancer compared to  
48 healthy adolescents. *Pediatr Blood Cancer* 2013;60(11):1902-7. doi:  
49 10.1002/psc.24706 [published Online First: 2013/07/31]
- 50 50. Varni JW, Burwinkle TM, Szer IS. The PedsQL Multidimensional Fatigue Scale in  
51 pediatric rheumatology: reliability and validity. *J Rheumatol* 2004;31(12):2494-500.  
52 [published Online First: 2004/12/01]
- 53 51. Varni JW, Limbers CA. The PedsQL Multidimensional Fatigue Scale in young adults:  
54 feasibility, reliability and validity in a University student population. *Qual Life Res*  
55 2008;17(1):105-14. doi: 10.1007/s11136-007-9282-5 [published Online First:  
56 2007/11/21]
- 57  
58  
59  
60

52. Varni JW, Limbers CA, Bryant WP, et al. The PedsQL Multidimensional Fatigue Scale in type 1 diabetes: feasibility, reliability, and validity. *Pediatr Diabetes* 2009;10(5):321-8. doi: 10.1111/j.1399-5448.2008.00482.x [published Online First: 2008/12/11]
53. Varni JW, Limbers CA, Bryant WP, et al. The PedsQL multidimensional fatigue scale in pediatric obesity: feasibility, reliability and validity. *Int J Pediatr Obes* 2010;5(1):34-42. doi: 10.3109/17477160903111706 [published Online First: 2009/07/14]
54. Varni JW, Limbers CA, Bryant WP, et al. Assessment of Fatigue in Pediatric Patients With Short Stature Utilizing the PedsQL™ Multidimensional Fatigue Scale. *Children's Health Care* 2012;41(2):162-81. doi: 10.1080/02739615.2012.657068
55. Varni JW, Beaujean AA, Limbers CA. Factorial invariance of pediatric patient self-reported fatigue across age and gender: a multigroup confirmatory factor analysis approach utilizing the PedsQL Multidimensional Fatigue Scale. *Qual Life Res* 2013;22(9):2581-94. doi: 10.1007/s11136-013-0370-4 [published Online First: 2013/02/21]
56. Panepinto JA, Torres S, Bendo CB, et al. PedsQL Multidimensional Fatigue Scale in sickle cell disease: feasibility, reliability, and validity. *Pediatr Blood Cancer* 2014;61(1):171-7. doi: 10.1002/pbc.24776 [published Online First: 2013/09/17]
57. Schriever VA, Agosin E, Altundag A, et al. Development of an International Odor Identification Test for Children: The Universal Sniff Test. *J Pediatr* 2018;198:265-72 e3. doi: 10.1016/j.jpeds.2018.03.011 [published Online First: 2018/05/08]
58. Gellrich J, Sparing-Paschke LM, Thieme T, et al. Normative data for olfactory threshold and odor identification in children and adolescents. *Int J Pediatr Otorhinolaryngol* 2019;123:5-9. doi: 10.1016/j.ijporl.2019.01.009 [published Online First: 2019/05/06]
59. Jones PW, Quirk FH, Baveystock CM. The St George's Respiratory Questionnaire. *Respir Med* 1991;85 Suppl B:25-31; discussion 33-7. doi: 10.1016/s0954-6111(06)80166-6 [published Online First: 1991/09/01]
60. Kroenke K, Spitzer RL, Williams JB. The PHQ-9: validity of a brief depression severity measure. *J Gen Intern Med* 2001;16(9):606-13. doi: 10.1046/j.1525-1497.2001.016009606.x [published Online First: 2001/09/15]
61. Blevins CA, Weathers FW, Davis MT, et al. The Posttraumatic Stress Disorder Checklist for DSM-5 (PCL-5): Development and Initial Psychometric Evaluation. *J Trauma Stress* 2015;28(6):489-98. doi: 10.1002/jts.22059 [published Online First: 2015/11/26]
62. Ravens-Sieberer U, Bullinger M. Assessing health-related quality of life in chronically ill children with the German KINDL: first psychometric and content analytical results. *Qual Life Res* 1998;7(5):399-407. doi: 10.1023/a:1008853819715 [published Online First: 1998/08/06]
63. Organization WH. COVID-19 Clinical management: living guidance.
64. Characterisation WHOWGotC, Management of C-i. A minimal common outcome measure set for COVID-19 clinical research. *Lancet Infect Dis* 2020;20(8):e192-e97. doi: 10.1016/S1473-3099(20)30483-7 [published Online First: 2020/06/17]
65. Corman VM, Landt O, Kaiser M, et al. Detection of 2019 novel coronavirus (2019-nCoV) by real-time RT-PCR. *Euro Surveill* 2020;25(3) doi: 10.2807/1560-7917.ES.2020.25.3.2000045 [published Online First: 2020/01/30]
66. Wolfel R, Corman VM, Guggemos W, et al. Virological assessment of hospitalized patients with COVID-2019. *Nature* 2020;581(7809):465-69. doi: 10.1038/s41586-020-2196-x [published Online First: 2020/04/03]
67. Liu X, Krawczyk E, Supryniewicz FA, et al. Conditional reprogramming and long-term expansion of normal and tumor cells from human biospecimens. *Nat Protoc* 2017;12(2):439-51. doi: 10.1038/nprot.2016.174 [published Online First: 2017/01/27]
68. Liu X, Ory V, Chapman S, et al. ROCK inhibitor and feeder cells induce the conditional reprogramming of epithelial cells. *Am J Pathol* 2012;180(2):599-607. doi: 10.1016/j.ajpath.2011.10.036 [published Online First: 2011/12/23]
69. Chapman S, Liu X, Meyers C, et al. Human keratinocytes are efficiently immortalized by a Rho kinase inhibitor. *J Clin Invest* 2010;120(7):2619-26. doi: 10.1172/JCI42297 [published Online First: 2010/06/03]



- 1  
2  
3 70. Gentsch M, Boyles SE, Chelvaraju C, et al. Pharmacological Rescue of Conditionally  
4 Reprogrammed Cystic Fibrosis Bronchial Epithelial Cells. *Am J Respir Cell Mol Biol*  
5 2017;56(5):568-74. doi: 10.1165/rcmb.2016-0276MA [published Online First:  
6 2016/12/17]
- 7 71. Salomon JJ, Albrecht T, Graeber SY, et al. Chronic rhinosinusitis with nasal polyps is  
8 associated with impaired TMEM16A-mediated epithelial chloride secretion. *J Allergy*  
9 *Clin Immunol* 2021;147(6):2191-201 e2. doi: 10.1016/j.jaci.2021.02.008 [published  
10 Online First: 2021/02/21]
- 11 72. Schulze J, Mache C, Balazs A, et al. Analysis of Severe Acute Respiratory Syndrome 2  
12 Replication in Explant Cultures of the Human Upper Respiratory Tract Reveals Broad  
13 Tissue Tropism of Wild-Type and B.1.1.7 Variant Viruses. *J Infect Dis*  
14 2021;224(12):2020-24. doi: 10.1093/infdis/jiab523 [published Online First:  
15 2021/10/16]
- 16 73. Martinovich KM, Iosifidis T, Buckley AG, et al. Conditionally reprogrammed primary  
17 airway epithelial cells maintain morphology, lineage and disease specific functional  
18 characteristics. *Sci Rep* 2017;7(1):17971. doi: 10.1038/s41598-017-17952-4  
19 [published Online First: 2017/12/23]
- 20 74. Bove PF, Dang H, Chelvaraju C, et al. Breaking the in vitro alveolar type II cell  
21 proliferation barrier while retaining ion transport properties. *Am J Respir Cell Mol Biol*  
22 2014;50(4):767-76. doi: 10.1165/rcmb.2013-0071OC [published Online First:  
23 2013/11/07]
- 24 75. Mall MA, Button B, Johannesson B, et al. Airway surface liquid volume regulation  
25 determines different airway phenotypes in liddle compared with betaENaC-  
26 overexpressing mice. *J Biol Chem* 2010;285(35):26945-55. doi:  
27 10.1074/jbc.M110.151803 [published Online First: 2010/06/23]
- 28 76. Liu X, Wu Y, Rong L. Conditionally Reprogrammed Human Normal Airway Epithelial  
29 Cells at ALI: A Physiological Model for Emerging Viruses. *Viral Sin* 2020;35(3):280-  
30 89. doi: 10.1007/s12250-020-00244-z [published Online First: 2020/06/20]
- 31 77. Duerr J, Leitz DHW, Szczygiel M, et al. Conditional deletion of Nedd4-2 in lung epithelial  
32 cells causes progressive pulmonary fibrosis in adult mice. *Nat Commun*  
33 2020;11(1):2012. doi: 10.1038/s41467-020-15743-6 [published Online First:  
34 2020/04/26]
- 35 78. Messner CB, Demichev V, Wendisch D, et al. Ultra-High-Throughput Clinical Proteomics  
36 Reveals Classifiers of COVID-19 Infection. *Cell Syst* 2020;11(1):11-24 e4. doi:  
37 10.1016/j.cels.2020.05.012 [published Online First: 2020/07/04]
- 38 79. Demichev V, Messner CB, Vernardis SI, et al. DIA-NN: neural networks and interference  
39 correction enable deep proteome coverage in high throughput. *Nat Methods*  
40 2020;17(1):41-44. doi: 10.1038/s41592-019-0638-x [published Online First:  
41 2019/11/27]
- 42 80. Sungnak W, Huang N, Becavin C, et al. SARS-CoV-2 entry factors are highly expressed  
43 in nasal epithelial cells together with innate immune genes. *Nat Med* 2020;26(5):681-  
44 87. doi: 10.1038/s41591-020-0868-6 [published Online First: 2020/04/25]
- 45 81. Chua RL, Lukassen S, Trump S, et al. COVID-19 severity correlates with airway  
46 epithelium-immune cell interactions identified by single-cell analysis. *Nat Biotechnol*  
47 2020;38(8):970-79. doi: 10.1038/s41587-020-0602-4 [published Online First:  
48 2020/06/28]
- 49 82. Mitchell WB. Thromboinflammation in COVID-19 acute lung injury. *Paediatr Respir Rev*  
50 2020;35:20-24. doi: 10.1016/j.prrv.2020.06.004 [published Online First: 2020/07/13]
- 51 83. Stahl M, Joachim C, Blessing K, et al. Multiple breath washout is feasible in the clinical  
52 setting and detects abnormal lung function in infants and young children with cystic  
53 fibrosis. *Respiration* 2014;87(5):357-63. doi: 10.1159/000357075 [published Online  
54 First: 2014/01/18]
- 55 84. Stahl M, Joachim C, Kirsch I, et al. Multicentre feasibility of multiple-breath washout in  
56 preschool children with cystic fibrosis and other lung diseases. *ERJ Open Res*  
57 2020;6(4) doi: 10.1183/23120541.00408-2020 [published Online First: 2020/12/03]
- 58  
59  
60

- 1  
2  
3 85. Beydon N, Davis SD, Lombardi E, et al. An official American Thoracic Society/European  
4 Respiratory Society statement: pulmonary function testing in preschool children. *Am J*  
5 *Respir Crit Care Med* 2007;175(12):1304-45. doi: 10.1164/rccm.200605-642ST  
6 [published Online First: 2007/06/05]  
7  
8 86. Saunders C, Jensen R, Robinson PD, et al. Integrating the multiple breath washout test  
9 into international multicentre trials. *J Cyst Fibros* 2020;19(4):602-07. doi:  
10 10.1016/j.jcf.2019.11.006 [published Online First: 2019/11/28]  
11  
12 87. Wilkinson MD, Dumontier M, Aalbersberg IJ, et al. The FAIR Guiding Principles for  
13 scientific data management and stewardship. *Sci Data* 2016;3:160018. doi:  
14 10.1038/sdata.2016.18 [published Online First: 2016/03/16]  
15  
16 88. Zimmermann P, Curtis N. Coronavirus Infections in Children Including COVID-19: An  
17 Overview of the Epidemiology, Clinical Features, Diagnosis, Treatment and  
18 Prevention Options in Children. *Pediatr Infect Dis J* 2020;39(5):355-68. doi:  
19 10.1097/INF.0000000000002660 [published Online First: 2020/04/21]  
20  
21 89. Stephenson E, Reynolds G, Botting RA, et al. Single-cell multi-omics analysis of the  
22 immune response in COVID-19. *Nat Med* 2021;27(5):904-16. doi: 10.1038/s41591-  
23 021-01329-2 [published Online First: 2021/04/22]  
24  
25 90. Bernardes JP, Mishra N, Tran F, et al. Longitudinal Multi-omics Analyses Identify  
26 Responses of Megakaryocytes, Erythroid Cells, and Plasmablasts as Hallmarks of  
27 Severe COVID-19. *Immunity* 2020;53(6):1296-314 e9. doi:  
28 10.1016/j.immuni.2020.11.017 [published Online First: 2020/12/10]  
29  
30 91. Trump S, Lukassen S, Anker MS, et al. Hypertension delays viral clearance and  
31 exacerbates airway hyperinflammation in patients with COVID-19. *Nat Biotechnol*  
32 2021;39(6):705-16. doi: 10.1038/s41587-020-00796-1 [published Online First:  
33 2020/12/29]  
34  
35 92. Stukalov A, Girault V, Grass V, et al. Multilevel proteomics reveals host perturbations by  
36 SARS-CoV-2 and SARS-CoV. *Nature* 2021;594(7862):246-52. doi: 10.1038/s41586-  
37 021-03493-4 [published Online First: 2021/04/13]  
38  
39 93. Wang C, Li X, Ning W, et al. Multi-omic profiling of plasma reveals molecular alterations  
40 in children with COVID-19. *Theranostics* 2021;11(16):8008-26. doi:  
41 10.7150/thno.61832 [published Online First: 2021/08/03]  
42  
43 94. Pierce CA, Preston-Hurlburt P, Dai Y, et al. Immune responses to SARS-CoV-2 infection  
44 in hospitalized pediatric and adult patients. *Sci Transl Med* 2020;12(564) doi:  
45 10.1126/scitranslmed.abd5487 [published Online First: 2020/09/23]  
46  
47 95. Cohen CA, Li APY, Hachim A, et al. SARS-CoV-2 specific T cell responses are lower in  
48 children and increase with age and time after infection. *Nat Commun*  
49 2021;12(1):4678. doi: 10.1038/s41467-021-24938-4 [published Online First:  
50 2021/07/31]  
51  
52  
53  
54  
55  
56  
57  
58  
59  
60

### Figure 1. Performed analyses in the RECAST study

The RECAST study consist of 8 elements, including the anamnesis and clinical data, a comprehensive multi-omics workup of the immune landscape of the blood and the upper airways and lung function testing.

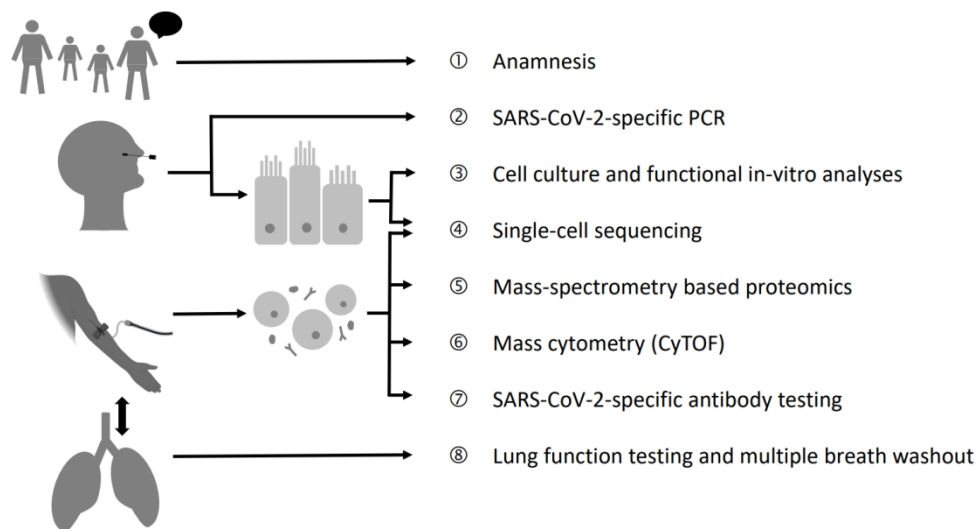

Figure 1. Performed analyses in the RECAST study

The RECAST study consist of 8 elements, including the anamnesis and clinical data, a comprehensive multi-omics workup of the immune landscape of the blood and the upper airways and lung function testing.

413x226mm (96 x 96 DPI)

1  
2  
3 **Appendix, table E1. Assessed data.**  
4  
5

| Assessed data                                                                                                                                                                                                               | Item list                                                                                                                                                                                                                                                                                                                                                                                                                                                                                                                                                                                                                                                                                                            |
|-----------------------------------------------------------------------------------------------------------------------------------------------------------------------------------------------------------------------------|----------------------------------------------------------------------------------------------------------------------------------------------------------------------------------------------------------------------------------------------------------------------------------------------------------------------------------------------------------------------------------------------------------------------------------------------------------------------------------------------------------------------------------------------------------------------------------------------------------------------------------------------------------------------------------------------------------------------|
| Family constellation                                                                                                                                                                                                        |                                                                                                                                                                                                                                                                                                                                                                                                                                                                                                                                                                                                                                                                                                                      |
| Biometric information, including sex at birth, body height, body weight, ethnicity, number of children and grand-children and profession                                                                                    |                                                                                                                                                                                                                                                                                                                                                                                                                                                                                                                                                                                                                                                                                                                      |
| Tests for SARS-CoV-2 in the last 4 weeks, including type, date and result                                                                                                                                                   |                                                                                                                                                                                                                                                                                                                                                                                                                                                                                                                                                                                                                                                                                                                      |
| Vaccination against SARS-CoV-2, including manufacturer, date(s) and symptoms after vaccination                                                                                                                              |                                                                                                                                                                                                                                                                                                                                                                                                                                                                                                                                                                                                                                                                                                                      |
| Temporal course of infection in the family                                                                                                                                                                                  |                                                                                                                                                                                                                                                                                                                                                                                                                                                                                                                                                                                                                                                                                                                      |
| Index case and assumed point of infection                                                                                                                                                                                   |                                                                                                                                                                                                                                                                                                                                                                                                                                                                                                                                                                                                                                                                                                                      |
| Information about household, including number of household members, pet animals and information about smoking (including smoked substances)                                                                                 |                                                                                                                                                                                                                                                                                                                                                                                                                                                                                                                                                                                                                                                                                                                      |
| Paediatric anamnesis, including biological parents and legal parents, gestational week at birth, problems during pregnancy, birth and perinatal period, childcare or daycare or school or training, previous RSV infections |                                                                                                                                                                                                                                                                                                                                                                                                                                                                                                                                                                                                                                                                                                                      |
| Medical conditions and therapy, including smoking (including substance and length), atopic disposition, allergies, asthma and previous hospitalizations                                                                     |                                                                                                                                                                                                                                                                                                                                                                                                                                                                                                                                                                                                                                                                                                                      |
| Symptoms (including duration) as listed and symptom severity according to WHO scales                                                                                                                                        | Fever or elevated temperature, exhaustion and fatigue, loss of appetite, dizziness, diarrhea, nausea, vomiting, impaired sense of taste or smell, rhinorrhea, congested nose, sneezing, unproductive cough, productive cough, shortness of breath, headache, abdominal pain, sore throat, muscle ache, chest pain, ear pain, joint pain, conjunctivitis, lymphadenitis, skin efflorescence, shivering, paresis, impaired consciousness                                                                                                                                                                                                                                                                               |
| Hygiene measures to prevent spreading of disease                                                                                                                                                                            |                                                                                                                                                                                                                                                                                                                                                                                                                                                                                                                                                                                                                                                                                                                      |
| Ability to smell, including parosmia                                                                                                                                                                                        |                                                                                                                                                                                                                                                                                                                                                                                                                                                                                                                                                                                                                                                                                                                      |
| Consequences of SARS-CoV-2 infection, including hospitalization, concomitant disease(s) and treatment                                                                                                                       |                                                                                                                                                                                                                                                                                                                                                                                                                                                                                                                                                                                                                                                                                                                      |
| Symptoms of Post-COVID or fatigue as listed, including their duration, whether dependent in occurrence or intensity on physical or mental stress or posture                                                                 | Pain, nausea, vomiting, lymphadenitis, loss of appetite, abdominal complaint(s), loss of smell or taste, palpitation, shortness of breath, coughing, fever, skin efflorescence, conjunctivitis, hair loss, reddening or swelling of hand or feet, reddening or swelling of tongue, lips or cheeks, exhaustion or fatigue, reduced physical and exercise capacity, sleep ineffectivity, disturbed sleeping rhythm, disturbed sleep duration, mood disturbance, cognitive impairment, behavioral changes, sadness or depression, restlessness or excitement, orthostatic dysregulation, increased sensibility to triggers, such as light, noise, smell, touch or others, impaired adaptability to cold, heat or others |

## STROBE Statement—checklist of items that should be included in reports of observational studies

|                           | Item No. | Recommendation                                                                                                                                                                                                                                                                                                                                                                                                                                                         | Page No. | Relevant text from manuscript |
|---------------------------|----------|------------------------------------------------------------------------------------------------------------------------------------------------------------------------------------------------------------------------------------------------------------------------------------------------------------------------------------------------------------------------------------------------------------------------------------------------------------------------|----------|-------------------------------|
| <b>Title and abstract</b> | 1        | (a) Indicate the study's design with a commonly used term in the title or the abstract                                                                                                                                                                                                                                                                                                                                                                                 | 1        | observational study           |
|                           |          | (b) Provide in the abstract an informative and balanced summary of what was done and what was found                                                                                                                                                                                                                                                                                                                                                                    | 4        |                               |
| <b>Introduction</b>       |          |                                                                                                                                                                                                                                                                                                                                                                                                                                                                        |          |                               |
| Background/rationale      | 2        | Explain the scientific background and rationale for the investigation being reported                                                                                                                                                                                                                                                                                                                                                                                   | 5, 6     |                               |
| Objectives                | 3        | State specific objectives, including any prespecified hypotheses                                                                                                                                                                                                                                                                                                                                                                                                       | 7        |                               |
| <b>Methods</b>            |          |                                                                                                                                                                                                                                                                                                                                                                                                                                                                        |          |                               |
| Study design              | 4        | Present key elements of study design early in the paper                                                                                                                                                                                                                                                                                                                                                                                                                | 8        |                               |
| Setting                   | 5        | Describe the setting, locations, and relevant dates, including periods of recruitment, exposure, follow-up, and data collection                                                                                                                                                                                                                                                                                                                                        | 8 - 10   |                               |
| Participants              | 6        | (a) <i>Cohort study</i> —Give the eligibility criteria, and the sources and methods of selection of participants. Describe methods of follow-up<br><i>Case-control study</i> —Give the eligibility criteria, and the sources and methods of case ascertainment and control selection. Give the rationale for the choice of cases and controls<br><i>Cross-sectional study</i> —Give the eligibility criteria, and the sources and methods of selection of participants | 9 - 10   |                               |
|                           |          | (b) <i>Cohort study</i> —For matched studies, give matching criteria and number of exposed and unexposed<br><i>Case-control study</i> —For matched studies, give matching criteria and the number of controls per case                                                                                                                                                                                                                                                 |          |                               |



|                              |    |                                                                                                                                                                                                                                                                                                                                                                                                                                                                                                                                                                                               |                                                             |
|------------------------------|----|-----------------------------------------------------------------------------------------------------------------------------------------------------------------------------------------------------------------------------------------------------------------------------------------------------------------------------------------------------------------------------------------------------------------------------------------------------------------------------------------------------------------------------------------------------------------------------------------------|-------------------------------------------------------------|
| Variables                    | 7  | Clearly define all outcomes, exposures, predictors, potential confounders, and effect modifiers. Give diagnostic criteria, if applicable                                                                                                                                                                                                                                                                                                                                                                                                                                                      | 10 - 13                                                     |
| Data sources/<br>measurement | 8* | For each variable of interest, give sources of data and details of methods of assessment (measurement). Describe comparability of assessment methods if there is more than one group                                                                                                                                                                                                                                                                                                                                                                                                          | 10 - 13                                                     |
| Bias                         | 9  | Describe any efforts to address potential sources of bias                                                                                                                                                                                                                                                                                                                                                                                                                                                                                                                                     | NA<br>study not<br>terminated, no<br>data interpretation    |
| Study size                   | 10 | Explain how the study size was arrived at                                                                                                                                                                                                                                                                                                                                                                                                                                                                                                                                                     | NA<br>study not<br>terminated,<br>no data<br>interpretation |
| Quantitative variables       | 11 | Explain how quantitative variables were handled in the analyses. If applicable, describe which groupings were chosen and why                                                                                                                                                                                                                                                                                                                                                                                                                                                                  | NA<br>study not<br>terminated,<br>no data<br>interpretation |
| Statistical methods          | 12 | <p>(a) Describe all statistical methods, including those used to control for confounding</p> <p>(b) Describe any methods used to examine subgroups and interactions</p> <p>(c) Explain how missing data were addressed</p> <p>(d) <i>Cohort study</i>—If applicable, explain how loss to follow-up was addressed</p> <p><i>Case-control study</i>—If applicable, explain how matching of cases and controls was addressed</p> <p><i>Cross-sectional study</i>—If applicable, describe analytical methods taking account of sampling strategy</p> <p>(e) Describe any sensitivity analyses</p> | NA<br>study not<br>terminated,<br>no data<br>interpretation |

For peer review only

|                   |     |                                                                                                                                                                                                                                                                                                                                                                                                               |                                                       |
|-------------------|-----|---------------------------------------------------------------------------------------------------------------------------------------------------------------------------------------------------------------------------------------------------------------------------------------------------------------------------------------------------------------------------------------------------------------|-------------------------------------------------------|
| Participants      | 13* | (a) Report numbers of individuals at each stage of study—eg numbers potentially eligible, examined for eligibility, confirmed eligible, included in the study, completing follow-up, and analysed<br>(b) Give reasons for non-participation at each stage<br>(c) Consider use of a flow diagram                                                                                                               | NA<br>study not terminated,<br>no data interpretation |
| Descriptive data  | 14* | (a) Give characteristics of study participants (eg demographic, clinical, social) and information on exposures and potential confounders<br>(b) Indicate number of participants with missing data for each variable of interest<br>(c) <i>Cohort study</i> —Summarise follow-up time (eg, average and total amount)                                                                                           |                                                       |
| Outcome data      | 15* | <i>Cohort study</i> —Report numbers of outcome events or summary measures over time<br><i>Case-control study</i> —Report numbers in each exposure category, or summary measures of exposure<br><i>Cross-sectional study</i> —Report numbers of outcome events or summary measures                                                                                                                             |                                                       |
| Main results      | 16  | (a) Give unadjusted estimates and, if applicable, confounder-adjusted estimates and their precision (eg, 95% confidence interval). Make clear which confounders were adjusted for and why they were included<br>(b) Report category boundaries when continuous variables were categorized<br>(c) If relevant, consider translating estimates of relative risk into absolute risk for a meaningful time period |                                                       |
| Other analyses    | 17  | Report other analyses done—eg analyses of subgroups and interactions, and sensitivity analyses                                                                                                                                                                                                                                                                                                                |                                                       |
| <b>Discussion</b> |     |                                                                                                                                                                                                                                                                                                                                                                                                               |                                                       |
| Key results       | 18  | Summarise key results with reference to study objectives                                                                                                                                                                                                                                                                                                                                                      | 14                                                    |
| Limitations       | 19  | Discuss limitations of the study, taking into account sources of potential bias or imprecision. Discuss both direction and magnitude of any potential bias                                                                                                                                                                                                                                                    | 14 - 15                                               |
| Interpretation    | 20  | Give a cautious overall interpretation of results considering objectives, limitations, multiplicity of analyses, results from similar studies, and other relevant evidence                                                                                                                                                                                                                                    | 15                                                    |
| Generalisability  | 21  | Discuss the generalisability (external validity) of the study results                                                                                                                                                                                                                                                                                                                                         | NA<br>study not terminated,<br>no data interpretation |

1  
2  
3  
4  
5  
6  
7  
8  
9  
10  
11  
12  
13  
14  
15  
16  
17  
18  
19  
20  
21  
22  
23  
24  
25  
26  
27  
28  
29  
30  
31  
32  
33  
34  
35  
36  
37  
38  
39  
40  
41  
42  
43  
44  
45  
46

---

**Other information**

---

|         |    |                                                                                                                                                               |    |
|---------|----|---------------------------------------------------------------------------------------------------------------------------------------------------------------|----|
| Funding | 22 | Give the source of funding and the role of the funders for the present study and, if applicable, for the original study on which the present article is based | 15 |
|---------|----|---------------------------------------------------------------------------------------------------------------------------------------------------------------|----|

---

\*Give information separately for cases and controls in case-control studies and, if applicable, for exposed and unexposed groups in cohort and cross-sectional studies.

**Note:** An Explanation and Elaboration article discusses each checklist item and gives methodological background and published examples of transparent reporting. The STROBE checklist is best used in conjunction with this article (freely available on the Web sites of PLoS Medicine at <http://www.plosmedicine.org/>, Annals of Internal Medicine at <http://www.annals.org/>, and Epidemiology at <http://www.epidem.com/>). Information on the STROBE Initiative is available at [www.strobe-statement.org](http://www.strobe-statement.org).
