# Supplementary material for: RECAST: Study protocol for an observational study for the understanding of the increased REsilience of Children compared to Adults in SARS-CoV-2 infecTion
Source: PubMed Central journal article supplement — BMJ Open. 2023 Apr 17;13(4):e065221. doi: 10.1136/bmjopen-2022-065221 (PMC10111194; doi:10.1136/bmjopen-2022-065221), 2023-04-17
Supplement: bmjopen-2022-065221supp001.pdf [file bmjopen-2022-065221supp001.pdf]

**Appendix, table E1. Assessed data.**

| <b>Assessed data</b>                                                                                                                                                                                                        | <b>Item list</b>                                                                                                                                                                                                                                                                                                                                                                                                                                                                                                                                                                                                                                                                                                     |
|-----------------------------------------------------------------------------------------------------------------------------------------------------------------------------------------------------------------------------|----------------------------------------------------------------------------------------------------------------------------------------------------------------------------------------------------------------------------------------------------------------------------------------------------------------------------------------------------------------------------------------------------------------------------------------------------------------------------------------------------------------------------------------------------------------------------------------------------------------------------------------------------------------------------------------------------------------------|
| Family constellation                                                                                                                                                                                                        |                                                                                                                                                                                                                                                                                                                                                                                                                                                                                                                                                                                                                                                                                                                      |
| Biometric information, including sex at birth, body height, body weight, ethnicity, number of children and grand-children and profession                                                                                    |                                                                                                                                                                                                                                                                                                                                                                                                                                                                                                                                                                                                                                                                                                                      |
| Tests for SARS-CoV-2 in the last 4 weeks, including type, date and result                                                                                                                                                   |                                                                                                                                                                                                                                                                                                                                                                                                                                                                                                                                                                                                                                                                                                                      |
| Vaccination against SARS-CoV-2, including manufacturer, date(s) and symptoms after vaccination                                                                                                                              |                                                                                                                                                                                                                                                                                                                                                                                                                                                                                                                                                                                                                                                                                                                      |
| Temporal course of infection in the family                                                                                                                                                                                  |                                                                                                                                                                                                                                                                                                                                                                                                                                                                                                                                                                                                                                                                                                                      |
| Index case and assumed point of infection                                                                                                                                                                                   |                                                                                                                                                                                                                                                                                                                                                                                                                                                                                                                                                                                                                                                                                                                      |
| Information about household, including number of household members, pet animals and information about smoking (including smoked substances)                                                                                 |                                                                                                                                                                                                                                                                                                                                                                                                                                                                                                                                                                                                                                                                                                                      |
| Paediatric anamnesis, including biological parents and legal parents, gestational week at birth, problems during pregnancy, birth and perinatal period, childcare or daycare or school or training, previous RSV infections |                                                                                                                                                                                                                                                                                                                                                                                                                                                                                                                                                                                                                                                                                                                      |
| Medical conditions and therapy, including smoking (including substance and length), atopic disposition, allergies, asthma and previous hospitalizations                                                                     |                                                                                                                                                                                                                                                                                                                                                                                                                                                                                                                                                                                                                                                                                                                      |
| Symptoms (including duration) as listed and symptom severity according to WHO scales                                                                                                                                        | Fever or elevated temperature, exhaustion and fatigue, loss of appetite, dizziness, diarrhea, nausea, vomiting, impaired sense of taste or smell, rhinorrhea, congested nose, sneezing, unproductive cough, productive cough, shortness of breath, headache, abdominal pain, sore throat, muscle ache, chest pain, ear pain, joint pain, conjunctivitis, lymphadenitis, skin efflorescence, shivering, paresis, impaired consciousness                                                                                                                                                                                                                                                                               |
| Hygiene measures to prevent spreading of disease                                                                                                                                                                            |                                                                                                                                                                                                                                                                                                                                                                                                                                                                                                                                                                                                                                                                                                                      |
| Ability to smell, including parosmia                                                                                                                                                                                        |                                                                                                                                                                                                                                                                                                                                                                                                                                                                                                                                                                                                                                                                                                                      |
| Consequences of SARS-CoV-2 infection, including hospitalization, concomitant disease(s) and treatment                                                                                                                       |                                                                                                                                                                                                                                                                                                                                                                                                                                                                                                                                                                                                                                                                                                                      |
| Symptoms of Post-COVID or fatigue as listed, including their duration, whether dependent in occurrence or intensity on physical or mental stress or posture                                                                 | Pain, nausea, vomiting, lymphadenitis, loss of appetite, abdominal complaint(s), loss of smell or taste, palpitation, shortness of breath, coughing, fever, skin efflorescence, conjunctivitis, hair loss, reddening or swelling of hand or feet, reddening or swelling of tongue, lips or cheeks, exhaustion or fatigue, reduced physical and exercise capacity, sleep ineffectivity, disturbed sleeping rhythm, disturbed sleep duration, mood disturbance, cognitive impairment, behavioral changes, sadness or depression, restlessness or excitement, orthostatic dysregulation, increased sensibility to triggers, such as light, noise, smell, touch or others, impaired adaptability to cold, heat or others |
